# Supplementary material for: Anion-templated synthesis of a switchable fluorescent [2]catenane with sulfate sensing capability
Source: Royal Society of Chemistry journal article supplement (doi:10.1039/d3sc05086f), 2023-12-18
Supplement: d3sc05086f1.pdf [file d3sc05086f1.pdf]

## Supporting Information

# Anion-templated synthesis of a switchable fluorescent [2]catenane with sulfate sensing capability

Krzysztof M. Bąk, Bartosz Trzaskowski, Michał J. Chmielewski

## Contents

|                                                                                          |    |
|------------------------------------------------------------------------------------------|----|
| 1. General Information .....                                                             | 2  |
| 1.1 Materials .....                                                                      | 2  |
| 1.2 Instruments and Methods .....                                                        | 2  |
| 2. Synthetic Procedures and Characterization of New Compounds .....                      | 3  |
| 3. NMR Spectra .....                                                                     | 7  |
| 4. DOSY Experiments .....                                                                | 16 |
| 5. Binding Studies .....                                                                 | 18 |
| 5.1 <sup>1</sup> H NMR Titrations .....                                                  | 18 |
| 5.2 UV-Vis Titrations .....                                                              | 48 |
| 5.3 Fluorescence Titrations .....                                                        | 65 |
| 6. Computational Studies .....                                                           | 67 |
| 6.1. Methods .....                                                                       | 67 |
| 6.2. Results .....                                                                       | 67 |
| 6.3. Conformation Search for 2:1 Complexes of Macrocycle <b>3</b> .....                  | 77 |
| 6.4. DFT Analysis of Sulfate Binding by Precursor <b>1</b> and Macrocycle <b>3</b> ..... | 89 |
| 7. References .....                                                                      | 90 |

## 1. General Information

### 1.1 Materials

All reagents were purchased from Alfa Aesar or Sigma-Aldrich and used without further purification. Deuterated solvents were purchased from Euriso-top. TLC was carried out on Merck silica gel 60 F254 plates. Preparative chromatography was done using Merck Silica Gel 60 (230-400 mesh) or Teledyne Isco CombiFlash system with RediSep Normal-phase Silica Flash Columns.

Tetrabutylammonium sulfate was purchased from Alfa Aesar as a 50% aqueous solution. Before drying, the pH of this solution was checked and found to be neutral (pH=7.3 upon dilution to 1 M concentration), confirming that the sample is essentially free from hydrogensulfate. Anhydrous salt was obtained in the following way: *ca.* 2 g of the 50% solution was transferred to a 50 ml round-bottom flask and most of the water was removed on a rotary evaporator with gentle heating over a few hours. Viscous residue was then further dried under high vacuum over KOH to a constant mass (in total *ca.* 47% loss of weight was reached). The resulting white crystalline solid was stored in a vacuum desiccator over KOH and used for titrations. Tetrabutylammonium chloride, tetrabutylammonium benzoate and tetrabutylammonium dihydrogen phosphate were obtained from Sigma-Aldrich and used as received.

### 1.2 Instruments and Methods

NMR spectra were recorded using Agilent 400 MHz or Bruker Avance 500 MHz spectrometers at ambient temperature in DMSO- $d_6$ . Chemical shifts are reported in parts per million (ppm) and coupling constants  $J$  are given in hertz (Hz). Data are reported as follows: chemical shift, multiplicity (s-singlet, bs – broad singlet, d – doublet, dd – doublet of doublets), coupling constant and integration. The residual signal of DMSO- $d_6$  solvent was used as an internal reference standard ( $\delta_H = 2.500$  ppm and  $\delta_C = 39.50$  ppm). The HR-ESI mass spectra were obtained using a Quattro TOF mass spectrometer with methanol as a spray solvent. Elemental analysis was performed using a CHN analyser model Vario EL III Elementar Analyser. Chlorine content in all analysed samples was determined according to the Schöniger method.

## 2. Synthetic Procedures and Characterization of New Compounds

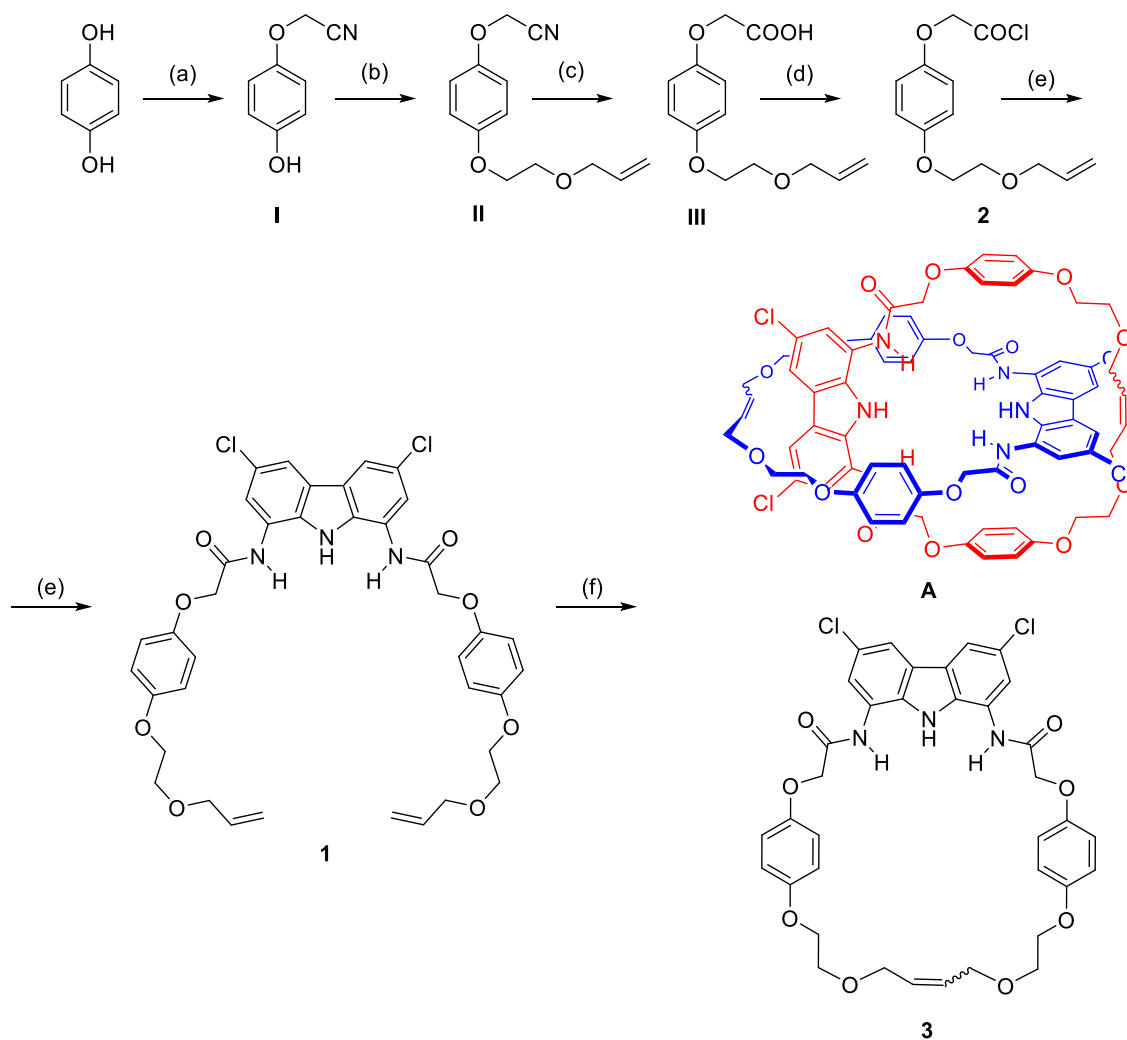

**Scheme S1.** Synthetic pathway leading to catenane **A**. (a)  $\text{NaOH}/\text{BrCH}_2\text{CN}$ ,  $\text{H}_2\text{O}/1,4\text{-dioxane}$  1:1, 1h, 49%; (b)  $\text{K}_2\text{CO}_3/2\text{-allyloxyethyl-}p\text{-toluene sulfonate}$ , acetonitrile, reflux, 20h, 80%; (c)  $\text{NaOH}$ ,  $\text{H}_2\text{O}/\text{MeOH}$  1:1, reflux, 24h, 94%; (d)  $\text{SOCl}_2$ , DCM, reflux, 24h, assumed quantitative; (e) 1,8-diamino-3,6-dichlorocarbazole/ $\text{Et}_3\text{N}$ , acetonitrile, RT, 40h, 80%; (f)  $\text{TBA}_2\text{SO}_4$ /tetrafluoro-1,4-benzoquinone/nitro-Grela SiPr catalyst, DCM, RT, 26% for **1**, 14% for **5**, 10% for **6**.

### Synthesis of **I**

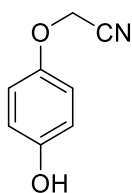

Prepared according to the previously published procedure.<sup>1</sup>

## Synthesis of II

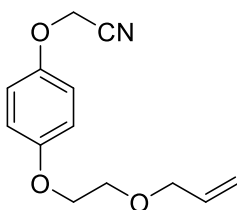

To a 250 ml two-neck round-bottom flask equipped with a magnetic stirrer, 2-(4-hydroxyphenoxy)acetonitrile (4.474 g, 30.00 mmol) and acetonitrile (75 ml) were added. The flask was equipped with a reflux condenser connected to a check-valve bubbler and argon was bubbled through the solution for 15 min. Afterwards, 2-allyloxyethyl-*p*-toluene sulfonate (7.690 g, 30.00 mmol) and solid potassium carbonate (4.561 g, 33.0 mmol) were added in a counterstream of argon. Argon inlet was removed and the reaction mixture was heated at reflux for 20 h under an argon atmosphere. After this time, reaction mixture was cooled down to room temperature, filtered, and washed with acetonitrile. The solvent was removed on a rotary evaporator. The product was purified by column chromatography using hexane/AcOEt mixture (9:1 – 8:2 v/v). Fractions containing pure product were combined and evaporated to yield a brown oil (5.617 g, 24.08 mmol, 80.3%). <sup>1</sup>H NMR in accordance with previously published data.<sup>2</sup>

## Synthesis of III

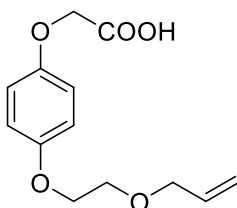

To a 250 ml one-neck round-bottom flask equipped with a magnetic stirrer, 2-(4-(2-allyloxyethoxy)phenoxy)acetonitrile (Compound II) (2.333 g, 10.0 mmol) and methanol (45 ml) were added, forming clear solution. Next, aqueous solution of NaOH (20%) was added (45 ml). The flask was equipped with a reflux condenser connected to a check-valve bubbler. Reaction mixture was heated at reflux for 24 h and then cooled down in an ice bath causing precipitation of a white solid. Mixture was acidified to pH 7 by the addition of 3 M aqueous HCl. Afterwards, solid was filtered, washed with water (3×15 ml) and dried in vacuo to give a pure white product (2.378 g, 9.427 mmol, 94.3%). <sup>1</sup>H NMR (400 MHz, DMSO-*d*<sub>6</sub>) δ<sub>DMSO</sub>: 12.95 (bs; 1H); 6.85 (m; *J* = 6.4 Hz; 2H); 5.90 (ddt; *J* = 17.3; 10.6; 5.4 Hz; 1H); 5.27 (ddd; *J* = 17.3; 3.7; 1.7 Hz; 1H); 5.15 (ddd; *J* = 10.4; 3.4; 1.4 Hz; 1H); 4.58 (s; 1H); 4.03 (m; 1H); 4.00 (dt; *J* = 5.4; 1.5 Hz; 1H); 3.68 (m; 1H) (Figure S1); <sup>13</sup>C NMR (101 MHz, DMSO-*d*<sub>6</sub>) δ<sub>DMSO</sub>: 170.84; 153.26; 152.28; 135.58; 116.93; 115.77; 115.69; 71.54; 68.65; 67.92; 65.49 (Figure S2) **HR MS** (ESI): *m/z* calcd. for C<sub>13</sub>H<sub>16</sub>O<sub>5</sub>Na [M+Na]<sup>+</sup>: 275.0895; found: 275.0883. **Elemental Analysis** calcd. for C<sub>13</sub>H<sub>16</sub>O<sub>5</sub>: C 61.90; H 6.39; found: C 61.90; H 6.30.

## Synthesis of 2

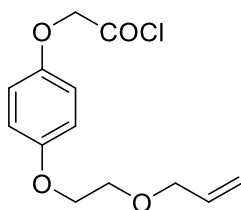

To a 100 ml single-neck round-bottom flask equipped with a magnetic stirrer, 2-(4-(2-allyloxy)ethoxy)phenoxy)acetic acid (2.000 g, 7.928 mmol), DCM (SPS, 30 ml) and thionyl chloride (1.800 ml, 23.78 mmol) were added. The flask was equipped with a reflux condenser connected to a check-valve bubbler. Reaction mixture was heated at reflux for 24 h. After that time, it was cooled down to room temperature and solvent was removed on a rotary evaporator. Product was dried *in vacuo* at 60°C, and used in the next synthetic step without further purification and characterization.

## Synthesis of 1

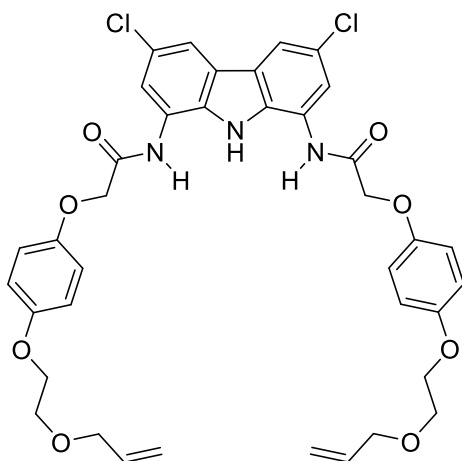

A 100 ml two-neck round-bottom flask was dried in a stream of hot air and then cooled down in vacuo. After that, it was equipped with a magnetic stirrer and 1,8-diamino-3,6-dichlorocarbazole (0.950 g, 3.568 mmol) was added. The flask was closed with rubber septum and purged with argon. Next, acetonitrile (40 ml) and triethylamine (1.2 ml, 8.7 mmol) were added. A single-neck round bottom flask with 2-(4-(2-allyloxy)ethoxy)phenoxy)acetyl chloride (Compound 2) obtained in the previous synthetic step was closed with a septum, purged with argon, and then acetonitrile (10 ml) was added. The solution of acetyl chloride was added dropwise to the solution of 1,8-diamino-3,6-dichlorocarbazole. Reaction mixture was left in room temperature for 40 h. After that, white solid was filtered, suspended in MeOH (50 ml) and placed in ultrasonic bath. Afterwards, it was filtered again and dried in vacuo, yielding pure precursor 1 of catenane (2.111 g, 2.873 mmol, 80%). <sup>1</sup>H NMR (400 MHz, DMSO-d<sub>6</sub>) δ<sub>DMSO</sub>: 10.81 (s; 1H); 10.32 (s; 2H); 8.19 (d; *J* = 1.9 Hz; 2H); 7.75 (d; *J* = 1.4 Hz; 2H); 7.02 (d; *J* = 9.1 Hz; 4H); 6.92 (d; *J* = 9.1 Hz; 4H); 5.89 (ddt; *J* = 17.2; 10.6; 5.4 Hz; 2H); 5.27 (ddd; *J* = 17.3; 3.6; 1.7 Hz; 2H); 5.15 (ddd; *J* = 10.5; 3.3; 1.4 Hz; 2H); 4.78 (s; 4H); 4.04 (m; 4H); 4.00 (dt; *J* = 5.3; 1.5 Hz; 4H); 3.69 (m; 4H); <sup>13</sup>C NMR (101 MHz, DMSO-d<sub>6</sub>) δ<sub>DMSO</sub>: 167.97; 153.55; 152.18; 135.57; 132.08; 124.65; 123.78; 123.75; 120.70; 117.60; 116.92; 116.23; 115.78; 71.55; 68.65; 68.22; 67.91;

**HR MS (ESI):** *m/z* calcd. for C<sub>38</sub>H<sub>36</sub>N<sub>3</sub>O<sub>8</sub>Cl<sub>2</sub> [M-H]<sup>-</sup>: 732.1879; found: 732.1877.

**Elemental Analysis** calcd. for C<sub>38</sub>H<sub>37</sub>N<sub>3</sub>O<sub>8</sub>Cl<sub>2</sub>: C 62.13; H 5.08; Cl 9.65; N 5.72; found: C 62.01; H 5.16; Cl 9.40; N 5.70.

## Synthesis of catenane A

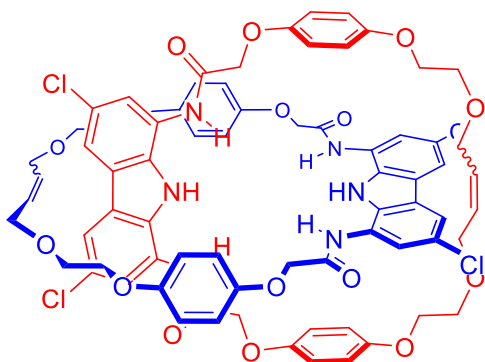

A 100 ml two-neck round-bottom flask was dried in an oven and cooled down *in vacuo*. Then the flask was equipped with a magnetic stirrer and acyclic precursor **1** (50 mg, 0.068 mmol) was added. The flask was closed with a rubber septum, purged with argon and dry DCM (SPS, 65 ml) was added. Nitro-Grela SiPr catalyst (2.48 mg, 0.00328 mmol, 5% mol), dried tetrabutylammonium sulfate (20.87 mg, 0.0359 mmol, 0.5 equiv.) and tetrafluoro-1,4-benzoquinone (1.17 mg, 0.0065 mmol, 10% mol) were weighed out in three separate vials, which were then filled with argon. DCM (SPS, 2 ml + 2 ml for vial washing) was added to the vial with tetrabutylammonium sulfate. This solution was then added to the reaction mixture causing immediate dissolution of the precursor. Dry DCM (SPS, 1 ml) was added to the vial with tetrafluoro-1,4-benzoquinone. This solution was then used to dissolve catalyst. The mixture of catalyst and quinone was added dropwise to the reaction mixture using a syringe pump (100  $\mu\text{L/h}$ ). Reaction was left overnight at room temperature. Next day, 1,4-piperazinedipropanenitrile (3.268 mg, 0.017 mmol, as 1 mg/ml DCM solution) was added to the reaction mixture and stirred for 30 min. to quench the reaction. After that, silica gel (0.5 g) was added and solvent was removed on a rotary evaporator (dry loading). The crude product was purified by a flash column chromatography (CombiFlash) on 4 g cartridge using gradient elution with DCM/MeOH mixtures (0 to 5% MeOH). Fractions containing pure products were combined and evaporated to yield catenane **A** (12.5 mg, 0.0088 mmol, 25.9%) and macrocycle **3** (4.1 mg, 0.0058 mmol).

**Catenane A**  $^1\text{H NMR}$  (500 MHz,  $\text{DMSO-d}_6$ )  $\delta_{\text{DMSO}}$ : 10.82 (bs, 1H), 10.29 (bs, 2H), 8.18 (bd, 2H), 7.76 (bd, 2H), 7.03 (d,  $J = 9.0$  Hz, 4H), 6.90 (d,  $J = 9.0$  Hz, 4H), 5.77 (bt, 2H), 4.75 (s, 4H), 4.04 – 3.96 (8H), 3.66 (m, 4H);  $^{13}\text{C NMR}$  (126 MHz,  $\text{DMSO-d}_6$ )  $\delta_{\text{DMSO}}$ : 167.41, 153.09, 151.65, 131.59, 128.92, 124.22, 123.32, 120.13, 117.16, 115.80, 115.29, 70.08, 68.09, 67.84, 67.45. **HR MS** (ESI-):  $m/z$  calcd. for  $\text{C}_{72}\text{H}_{64}\text{N}_6\text{O}_{16}\text{Cl}_4$   $[\text{M}-2\text{H}]^{2-}$ : 704.1561; found: 704.1562.

**Macrocycle 3**  $^1\text{H NMR}$  (500 MHz,  $\text{DMSO-d}_6$ )  $\delta_{\text{DMSO}}$ : 11.02 (bs, 1H), 10.24 (bs, 2H), 8.19 (bd, 2H), 7.83 (bd, 2H), 7.08 (d,  $J = 7.5$  Hz, 4H), 6.91 (d,  $J = 7.7$  Hz, 4H), 5.78 (bs, 2H), 4.74 (bs, 4H), 4.01 (8H), 3.67 (bs, 4H).  $^{13}\text{C NMR}$  (126 MHz,  $\text{DMSO-d}_6$ )  $\delta_{\text{DMSO}}$ : 167.36, 153.20, 151.57, 131.47, 128.84, 124.26, 123.37, 119.89, 117.13, 115.88, 115.30, 69.73, 68.02, 67.92, 67.64. **HR MS** (ESI):  $m/z$  calcd. for  $\text{C}_{36}\text{H}_{33}\text{N}_3\text{O}_8\text{Cl}_2\text{Na}$   $[\text{M}+\text{Na}]^+$ : 728.1530; found: 728.1542.

### 3. NMR Spectra

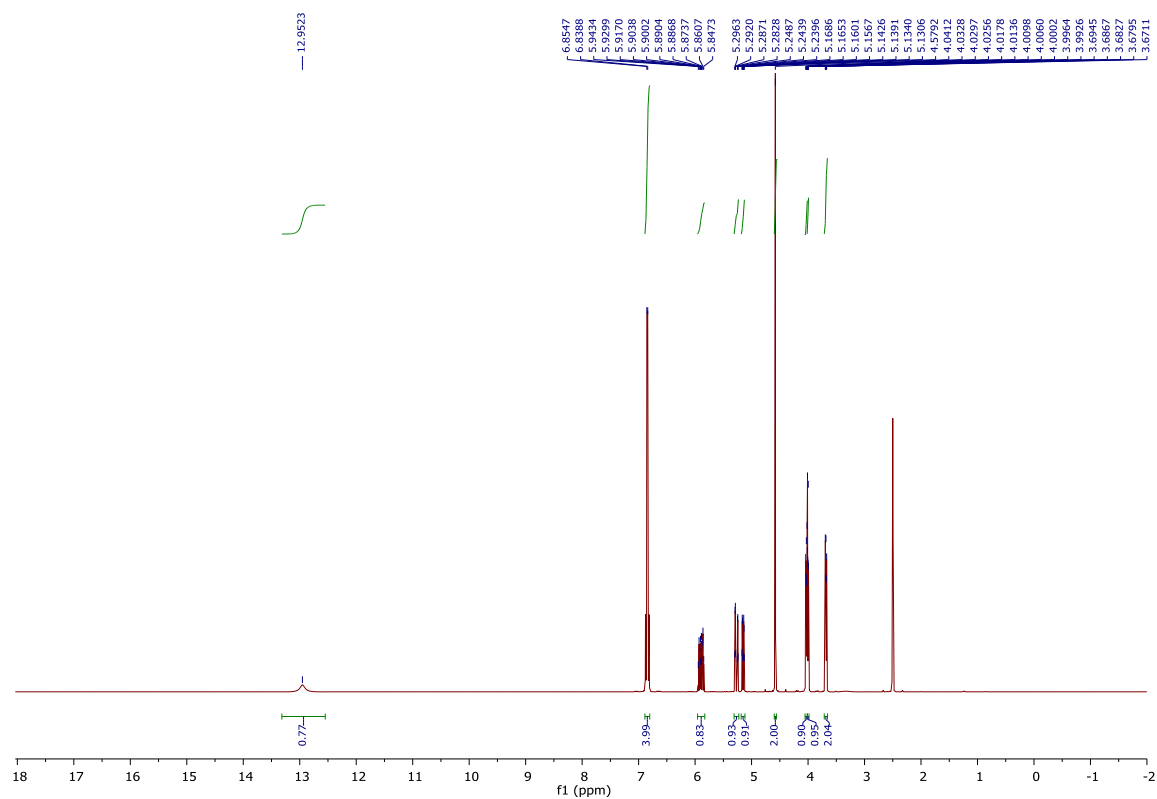

Figure S1.  $^1\text{H}$  NMR spectrum of compound III in  $\text{DMSO-d}_6$ .

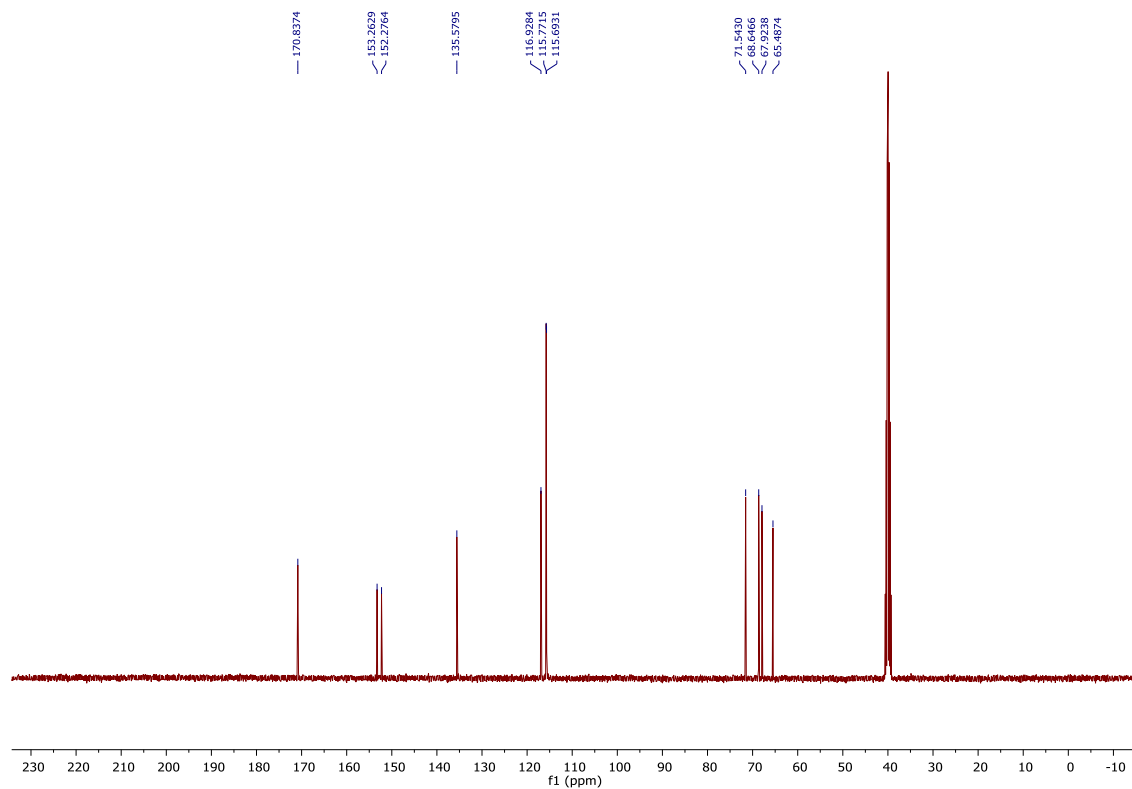

Figure S2.  $^{13}\text{C}$  NMR spectrum of compound III in  $\text{DMSO-d}_6$ .

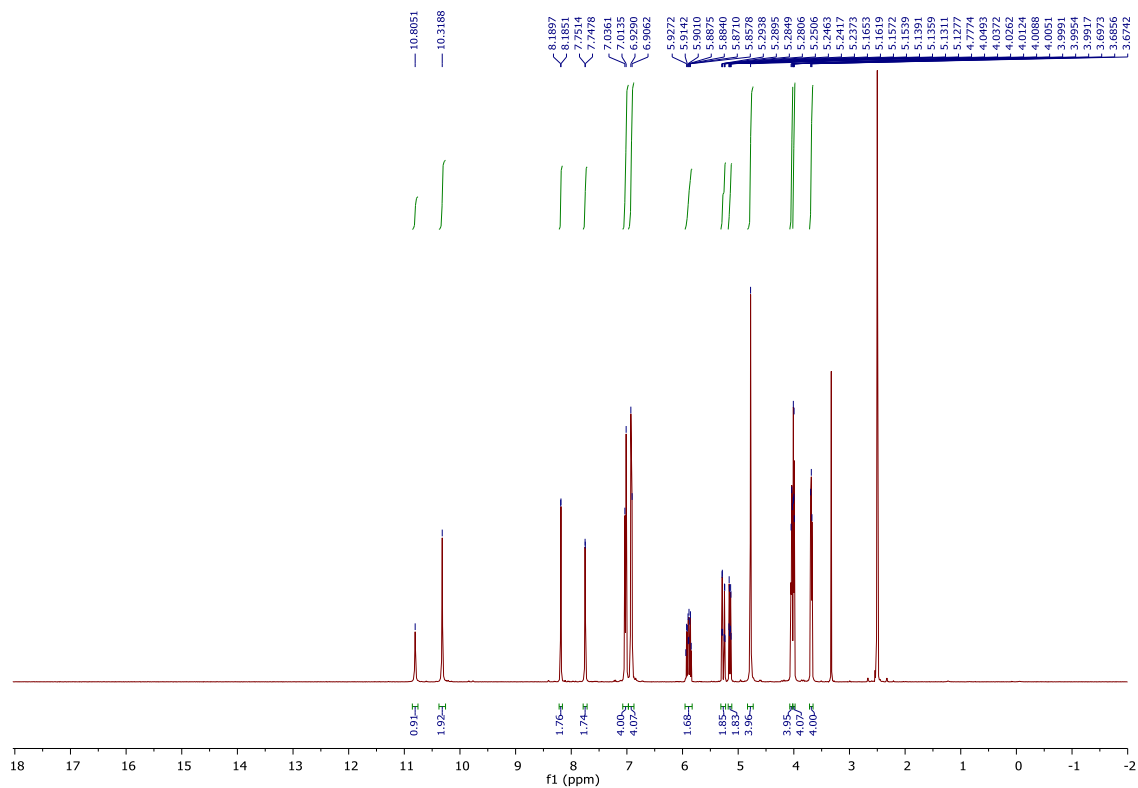

Figure S3.  $^1\text{H}$  NMR spectrum of precursor **1** in  $\text{DMSO-d}_6$ .

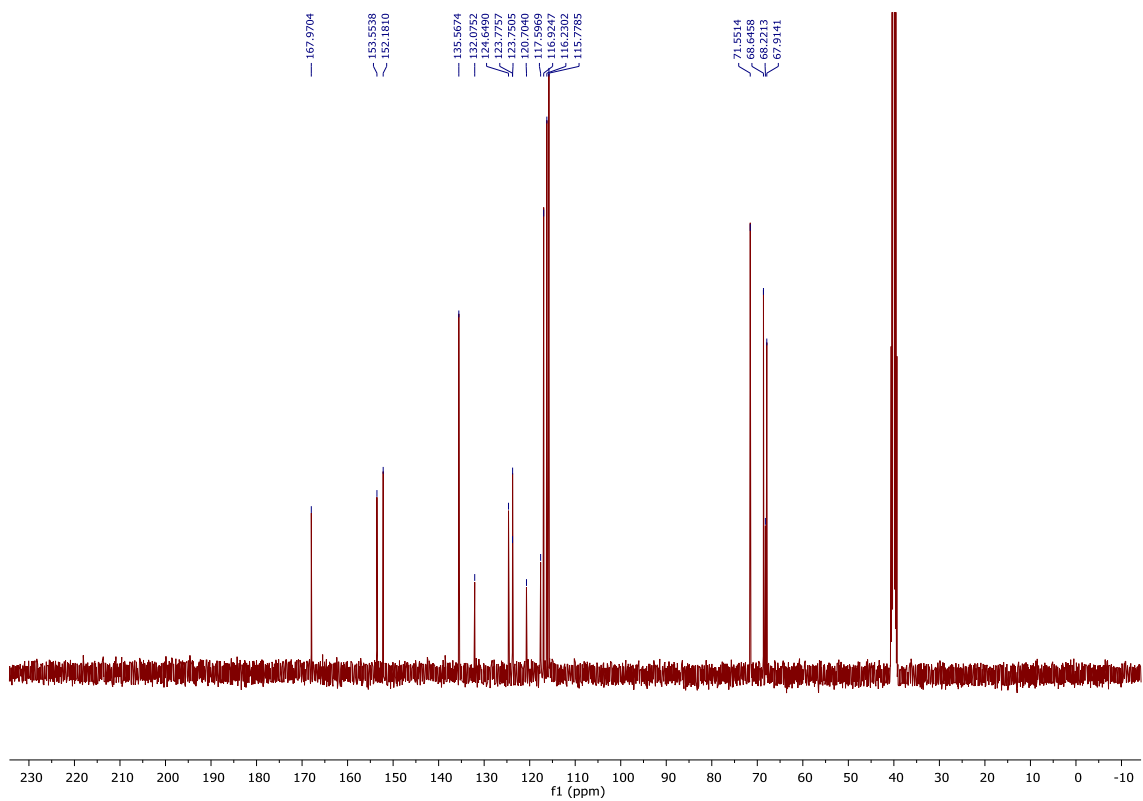

Figure S4.  $^{13}\text{C}$  NMR spectrum of precursor **1** in  $\text{DMSO-d}_6$ .



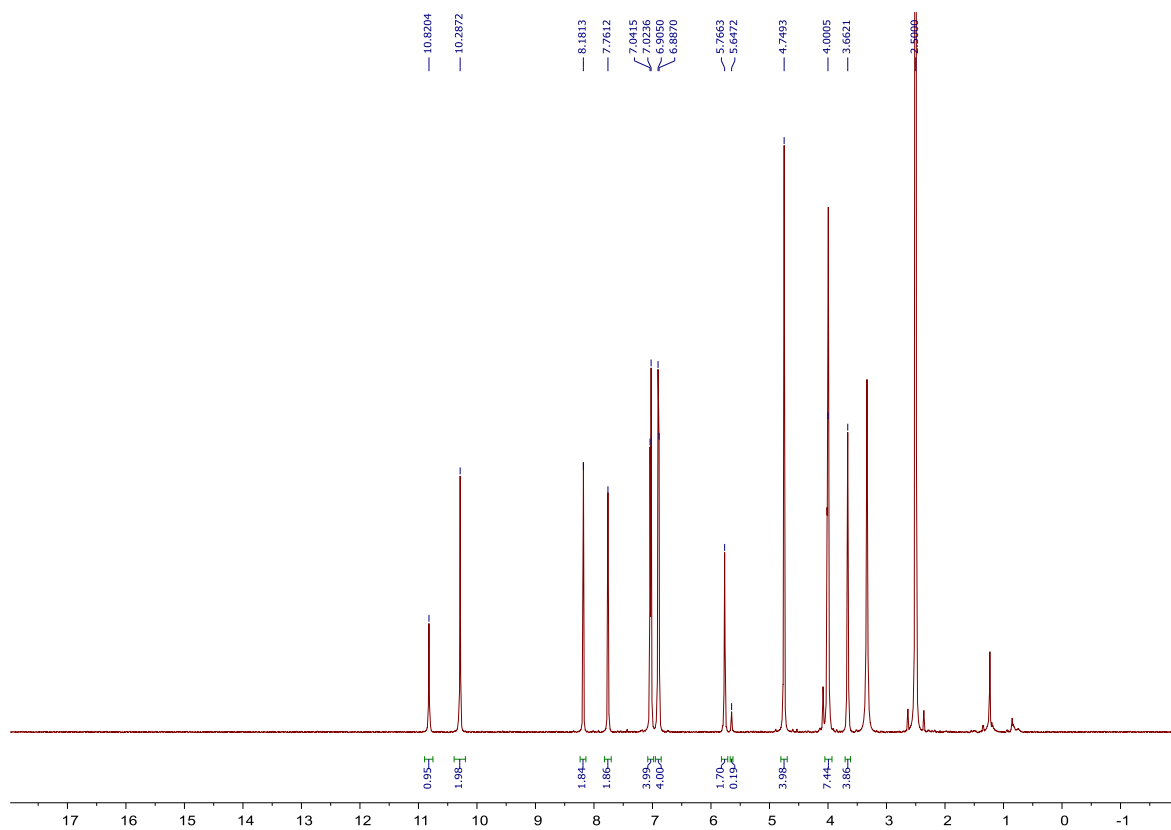

Figure S5.  $^1\text{H}$  NMR spectrum of catenane **A** in  $\text{DMSO-d}_6$ .

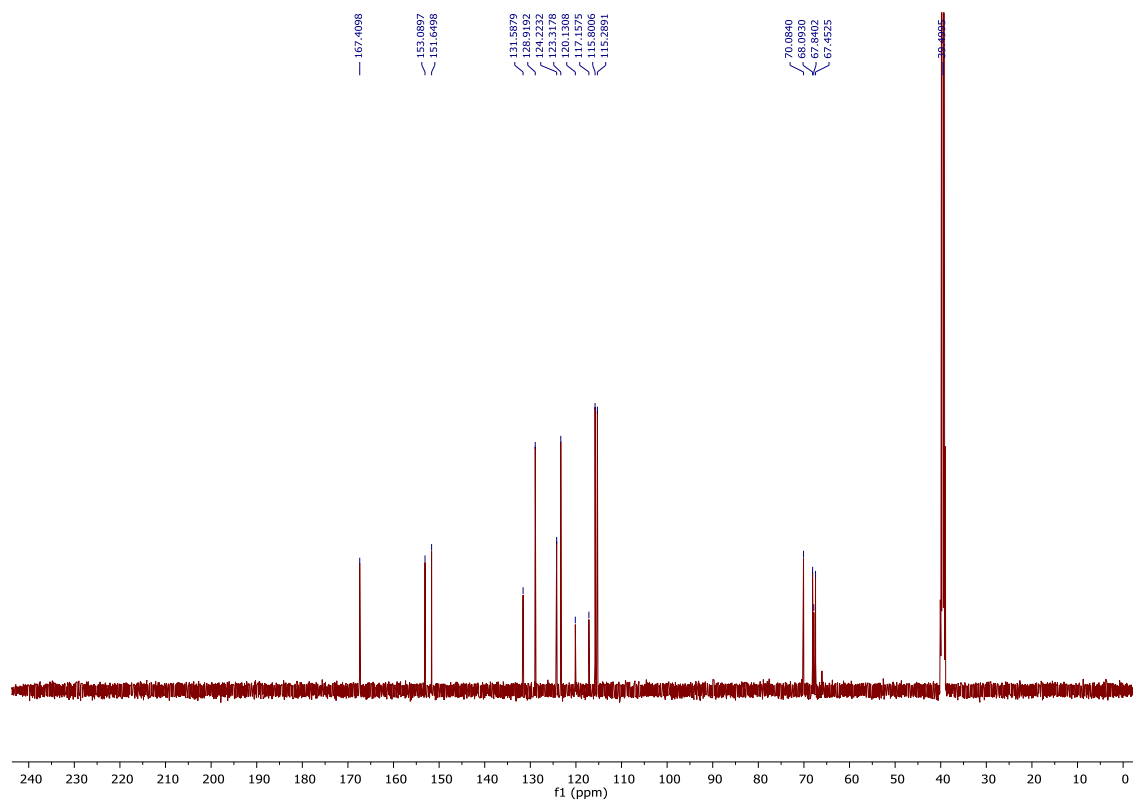

Figure S6.  $^{13}\text{C}$  NMR spectrum of catenane **A** in  $\text{DMSO-d}_6$ .

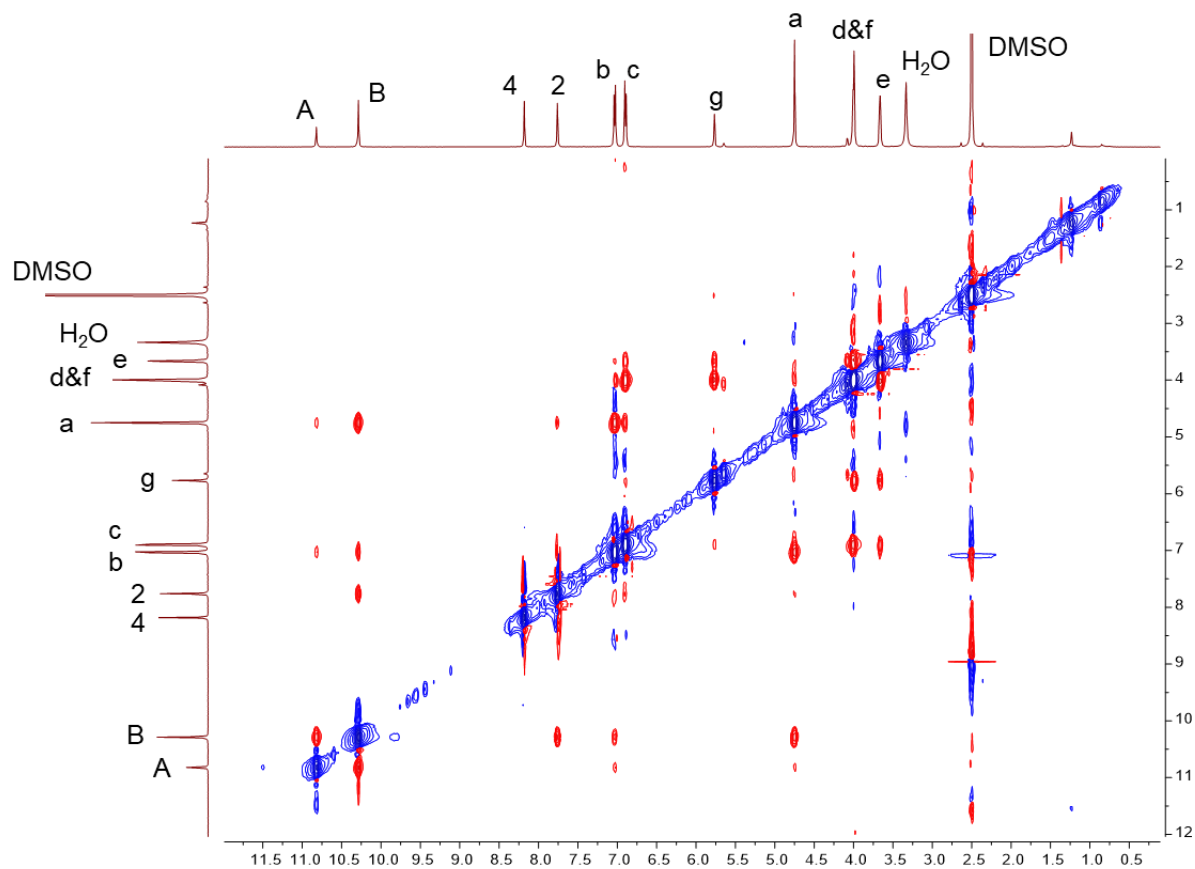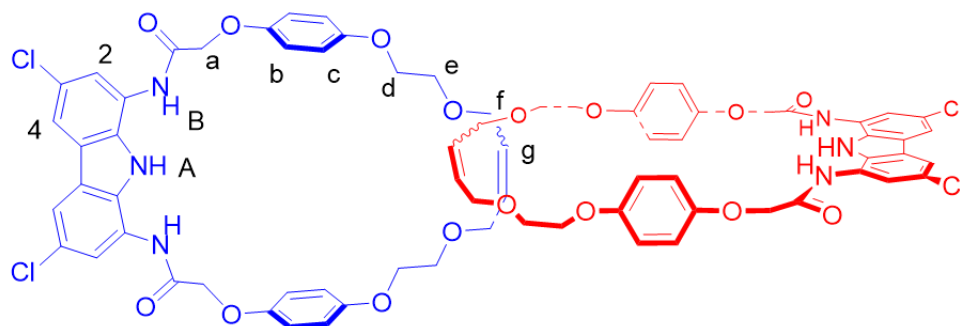

**Figure S7.** 2D  $^1\text{H}$ - $^1\text{H}$  ROESY spectrum of catenane **A** in  $\text{DMSO-d}_6$ . No cross signals characteristic for an interlocked architecture were found.

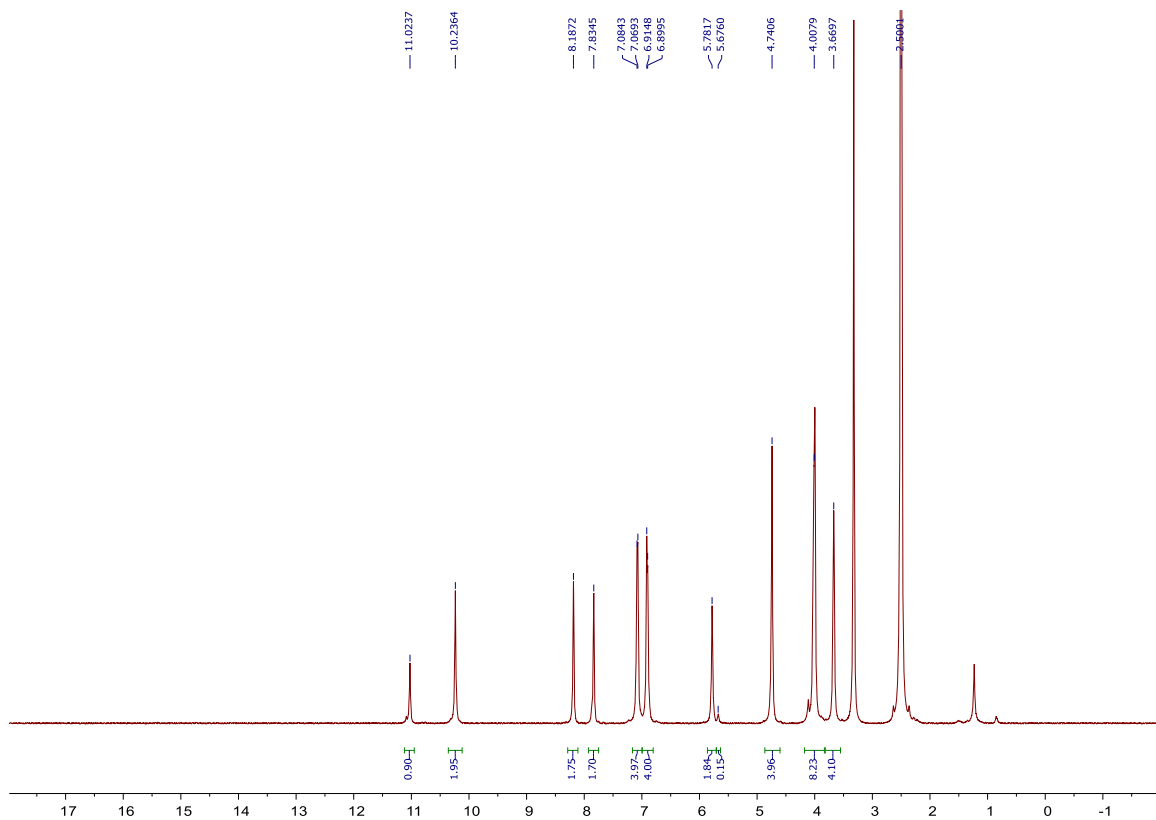

Figure S8.  $^1\text{H}$  NMR spectrum of macrocycle **3** in  $\text{DMSO-d}_6$ .

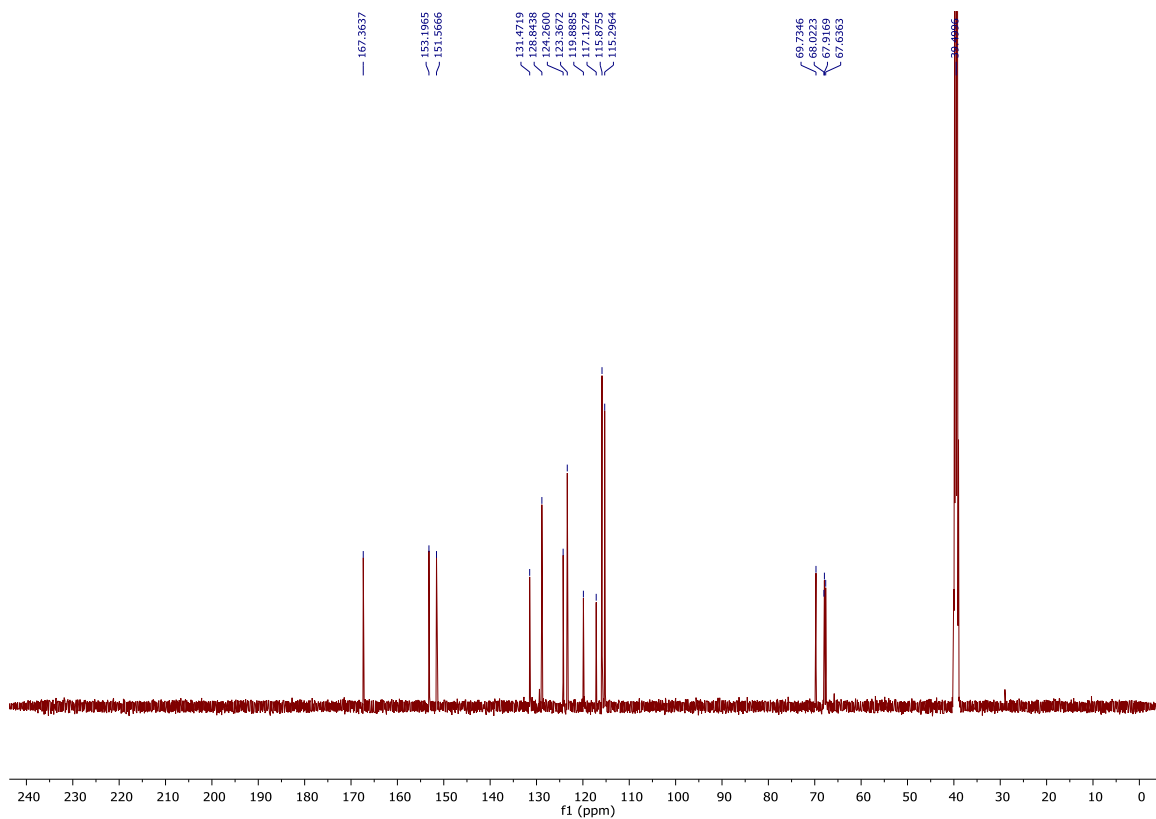

Figure S9.  $^{13}\text{C}$  NMR spectrum of macrocycle **3** in  $\text{DMSO-d}_6$ .

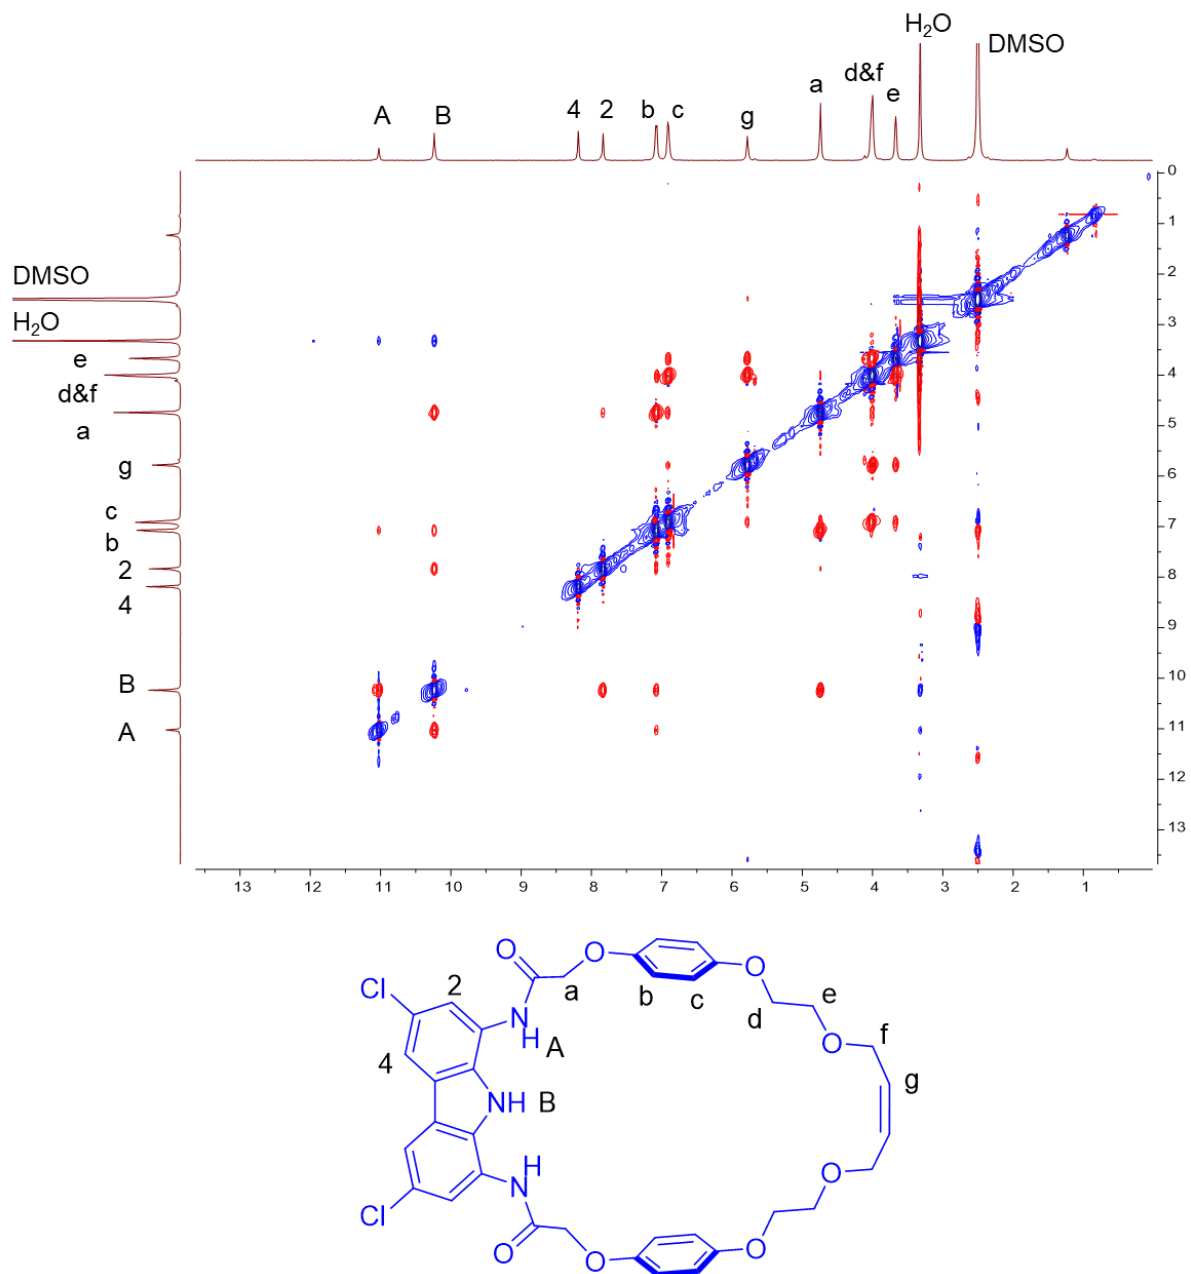

**Figure S10.** 2D  $^1\text{H}$ - $^1\text{H}$  ROESY spectrum of macrocycle **3** in  $\text{DMSO-d}_6$ . Similar pattern of cross peaks were observed as in the case of catenane **A** (Fig. S7)

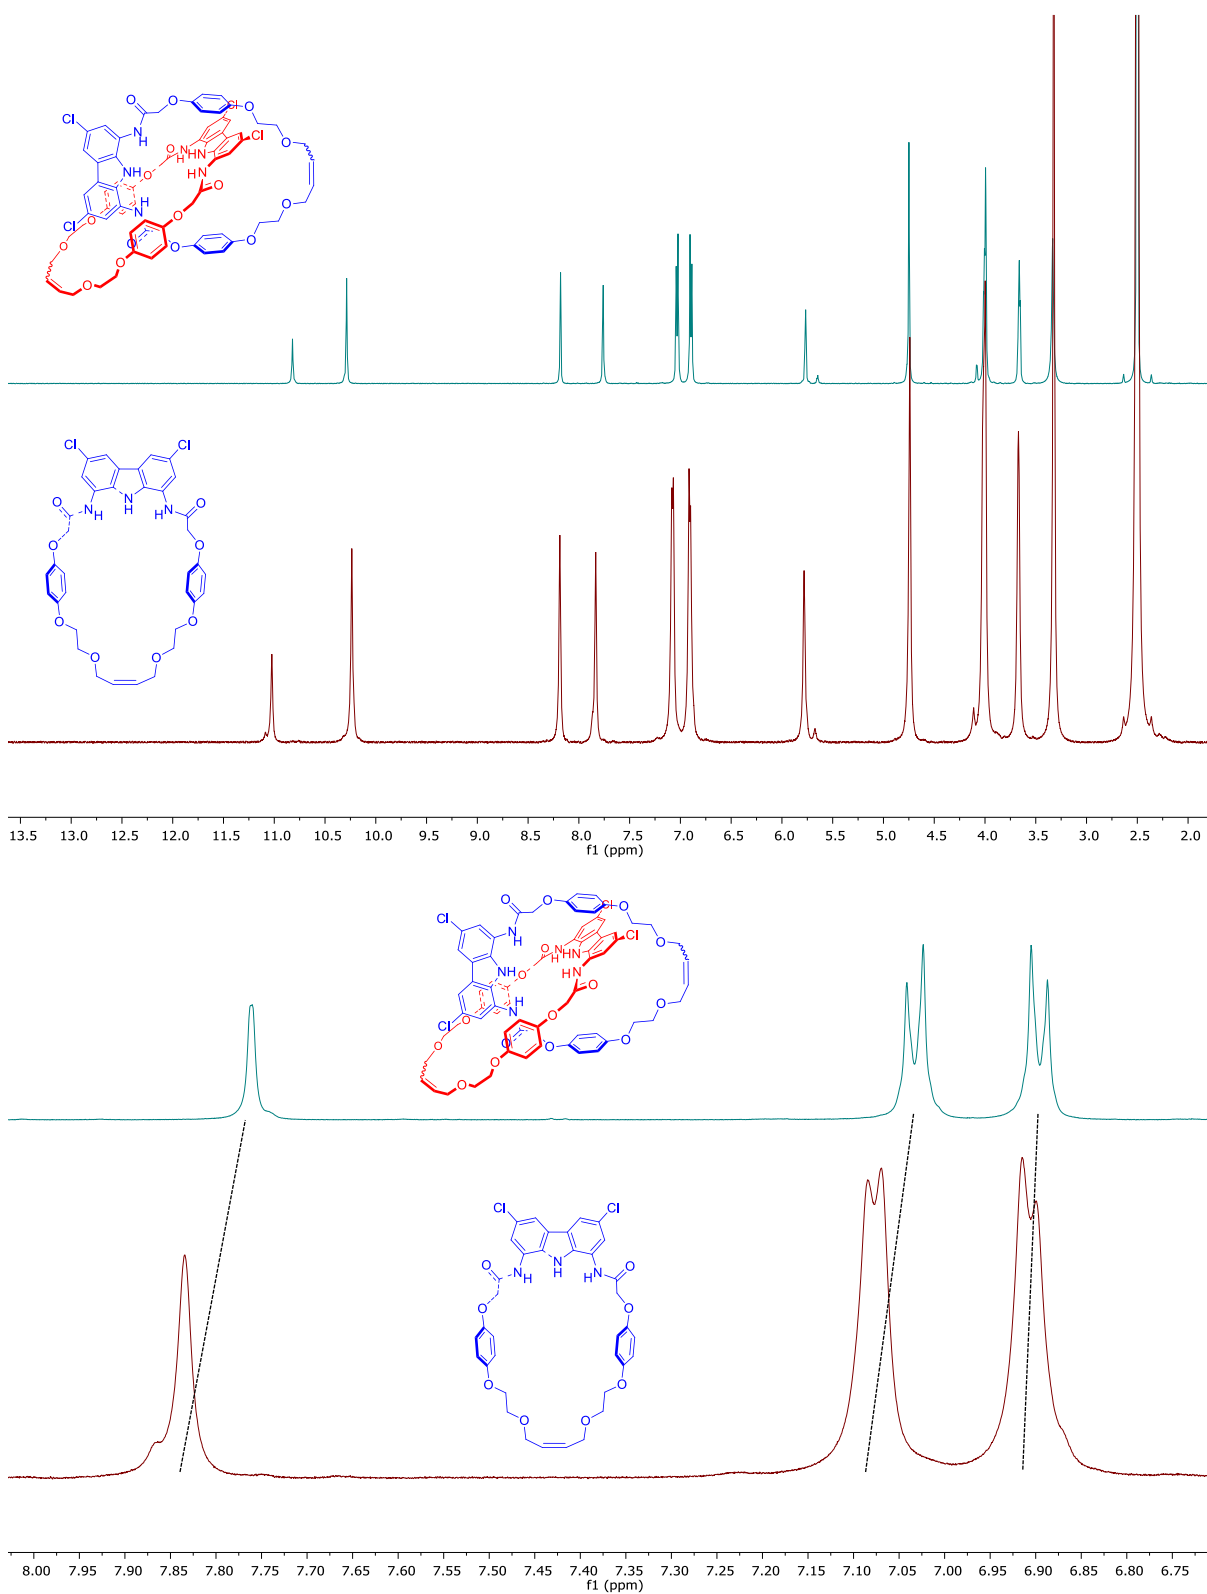

**Figure S11.** Comparison of <sup>1</sup>H NMR spectra of catenane **A** and macrocycle **3**. Lower stack presents zoom of aromatic 6.70-8.00 ppm region. Signals of carbazole CH-2 proton and hydroquinone protons *B* & *C* are slightly shifted downfield as a result of shielding effect in the interlocked architecture.

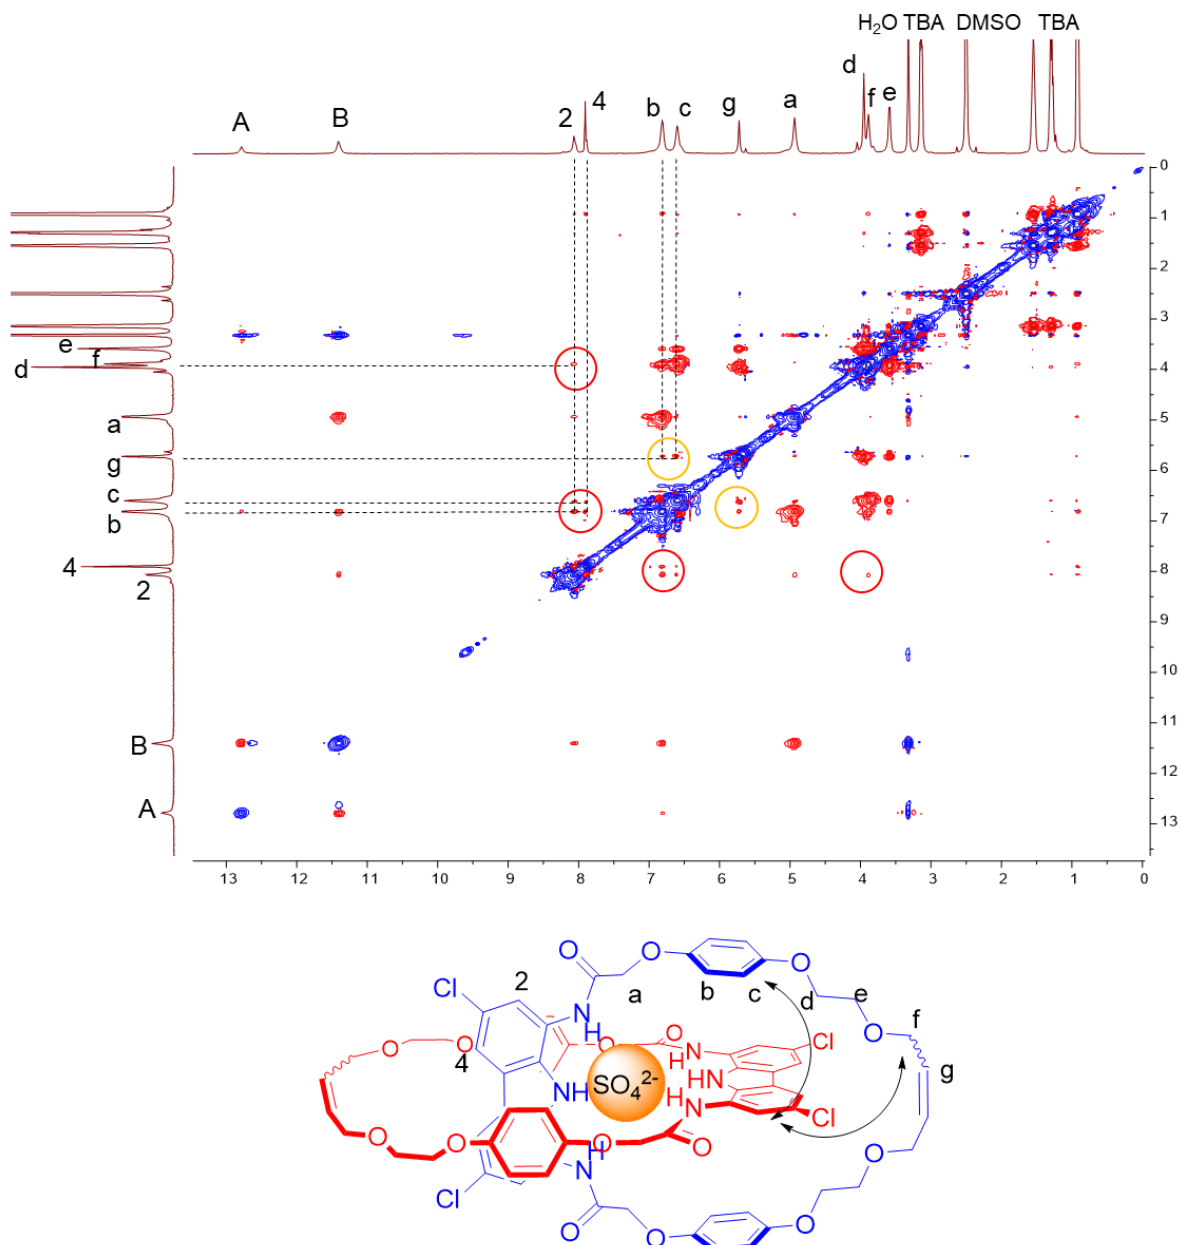

**Figure S12.** 2D  $^1\text{H}$ - $^1\text{H}$  ROESY spectrum of catenane **A** in the presence of 1 equivalent of  $\text{TBA}_2\text{SO}_4$  recorded in  $\text{DMSO-d}_6$ . Sulfate binding rigidifies the structure of catenane leading to appearance of the specific cross peaks (encircled), e.g. between protons b/c and 2/4 or g and b/c, characteristic for the interlocked structure.

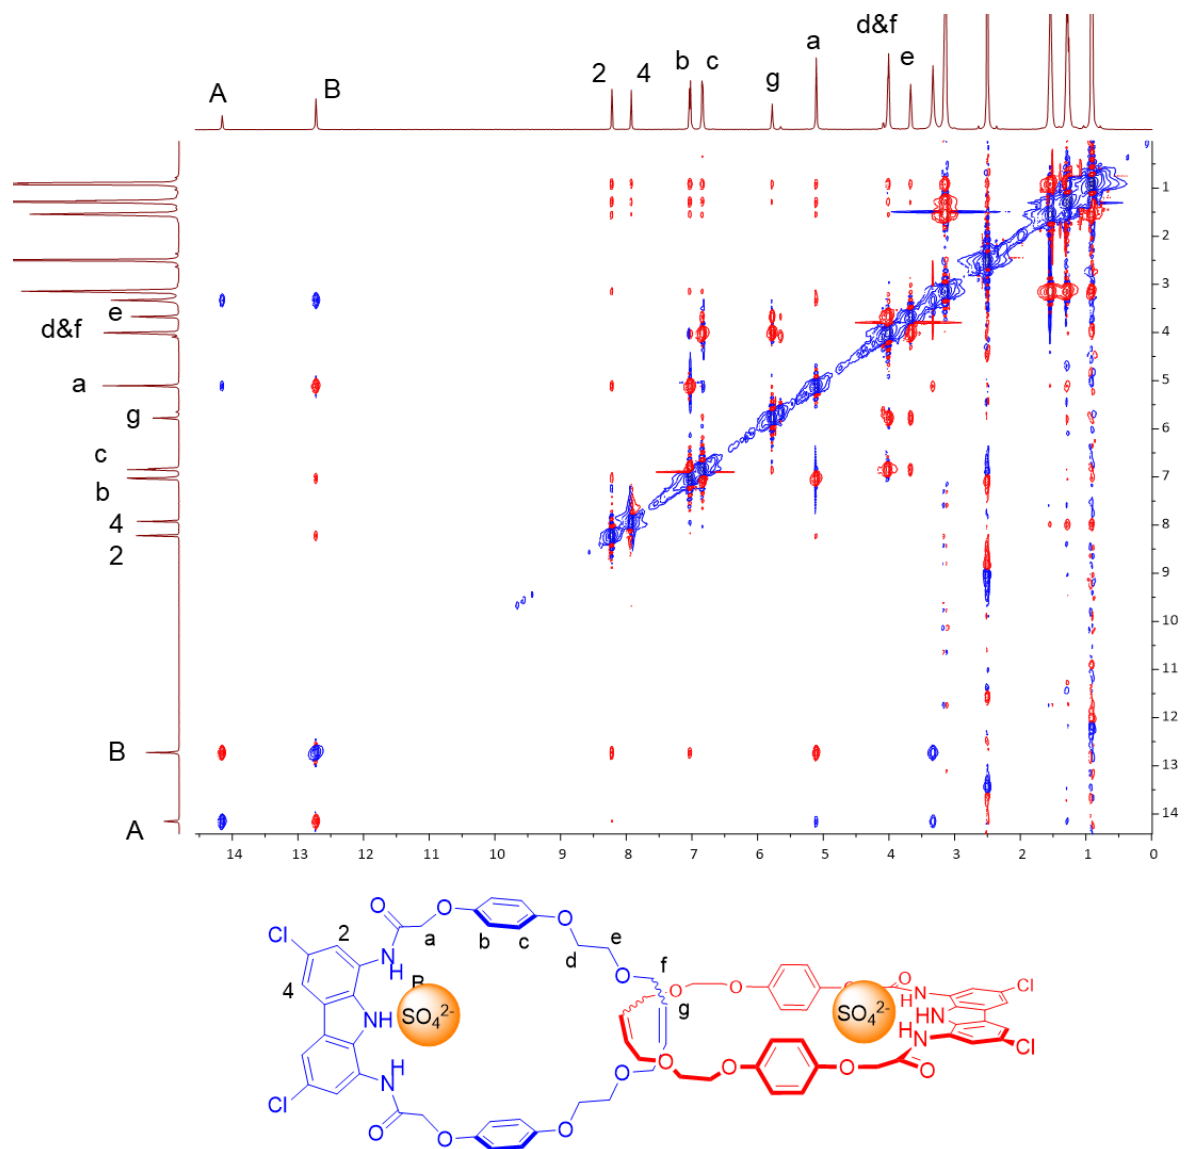

**Figure S13.** 2D  $^1\text{H}$ - $^1\text{H}$  ROESY spectrum of catenane **A** in presence of 2.5 equivalents of  $\text{TBA}_2\text{SO}_4$  recorded in  $\text{DMSO-d}_6$ . In excess of sulfate characteristic cross peaks present in ROESY spectrum of catenane **A** in presence of 1 equivalent of  $\text{TBA}_2\text{SO}_4$  disappeared, suggesting the catenane drastically changes its conformation in 1:2 complex.

#### 4. DOSY Experiments

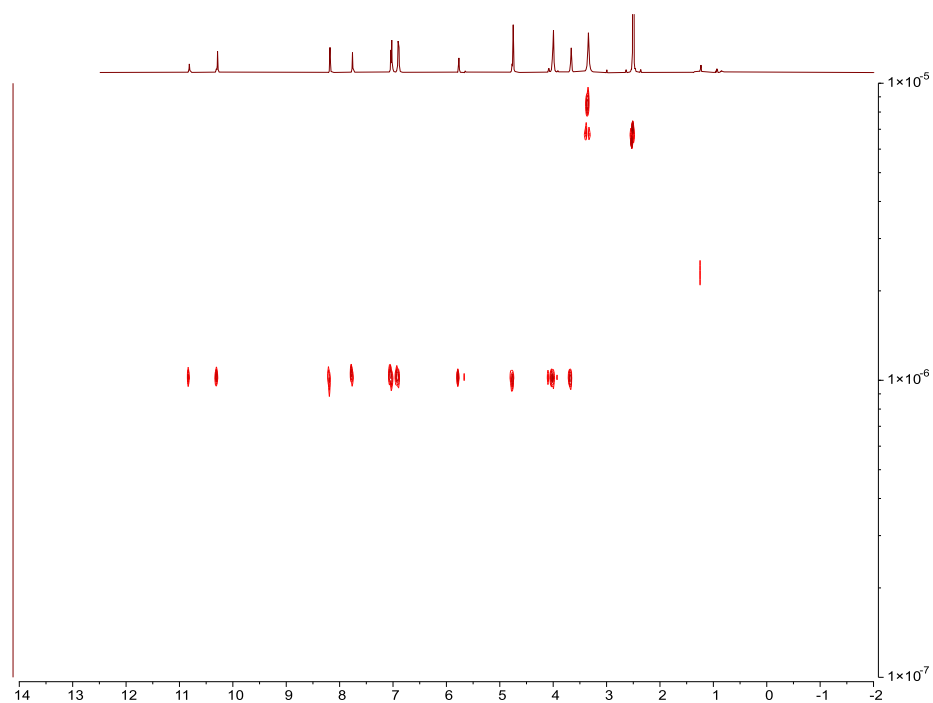

**Figure S14.** DOSY spectrum of catenane **A** in DMSO- $d_6$ . Concentration of **A**: 0.002 M. Temperature: 298 K. The calculated diffusion coefficient equals to:  $D_A = 1.03 \cdot 10^{-6} \text{ cm}^2/\text{s}$ .

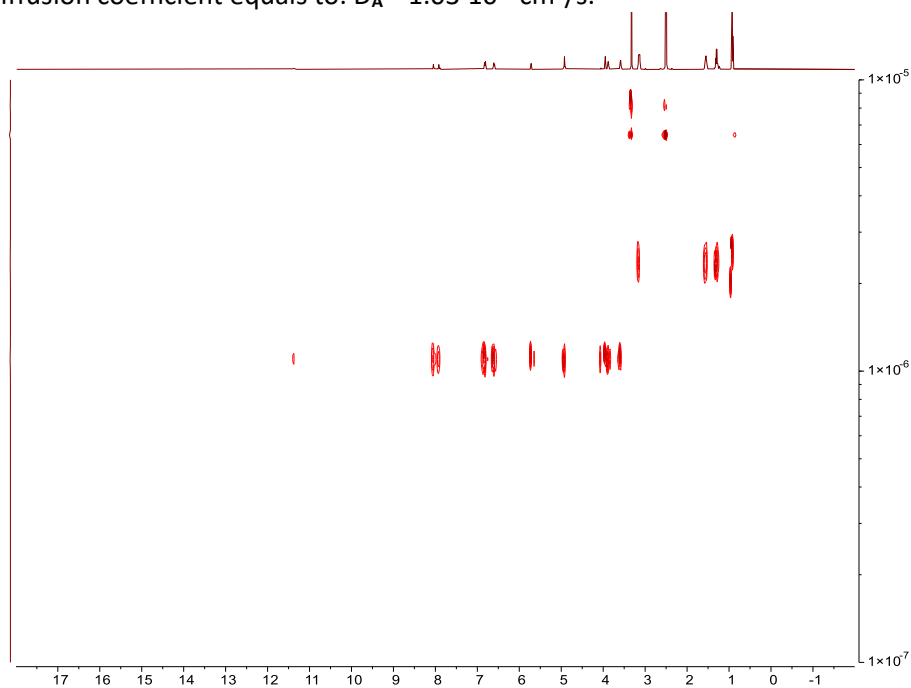

**Figure S15.** DOSY spectrum of catenane **A** in the presence of 1 equivalent of  $\text{TBA}_2\text{SO}_4$  in DMSO- $d_6$ . Concentration of **A**: 0.002 M. Temperature: 298 K. The calculated diffusion coefficient equals to:  $D_{A \times \text{SO}_4} = 1.11 \cdot 10^{-6} \text{ cm}^2/\text{s}$ .



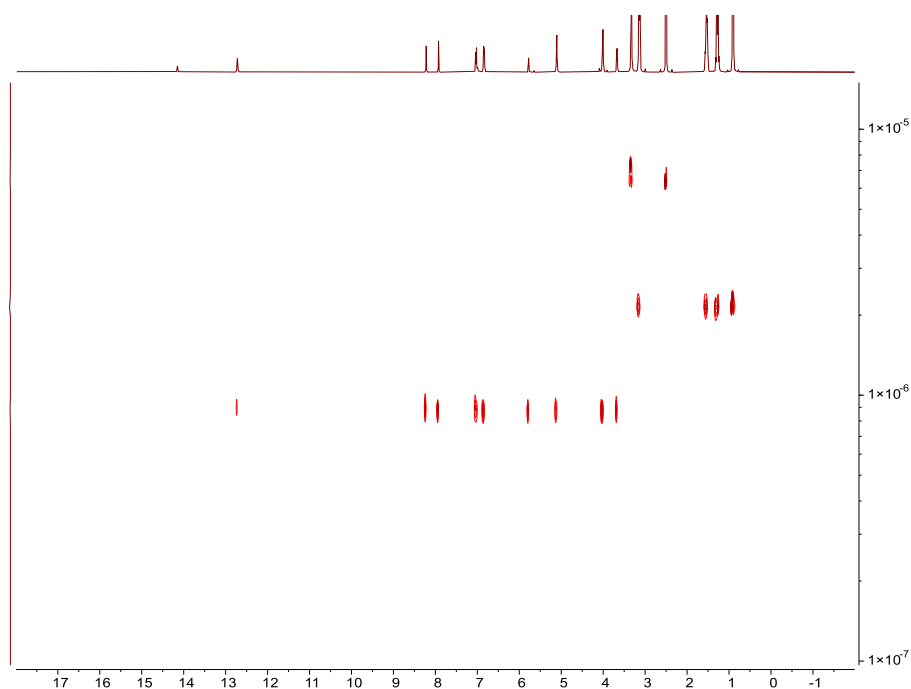

**Figure S16.** DOSY spectrum of catenane **A** in the presence of 2.5 equivalent of TBA<sub>2</sub>SO<sub>4</sub> in DMSO-d<sub>6</sub>. Concentration of **A**: 0.002 M. Temperature: 298 K. The calculated diffusion coefficient equals to:  $D_{SO_4 \times A \times SO_4} = 0.89 \cdot 10^{-6} \text{ cm}^2/\text{s}$ .

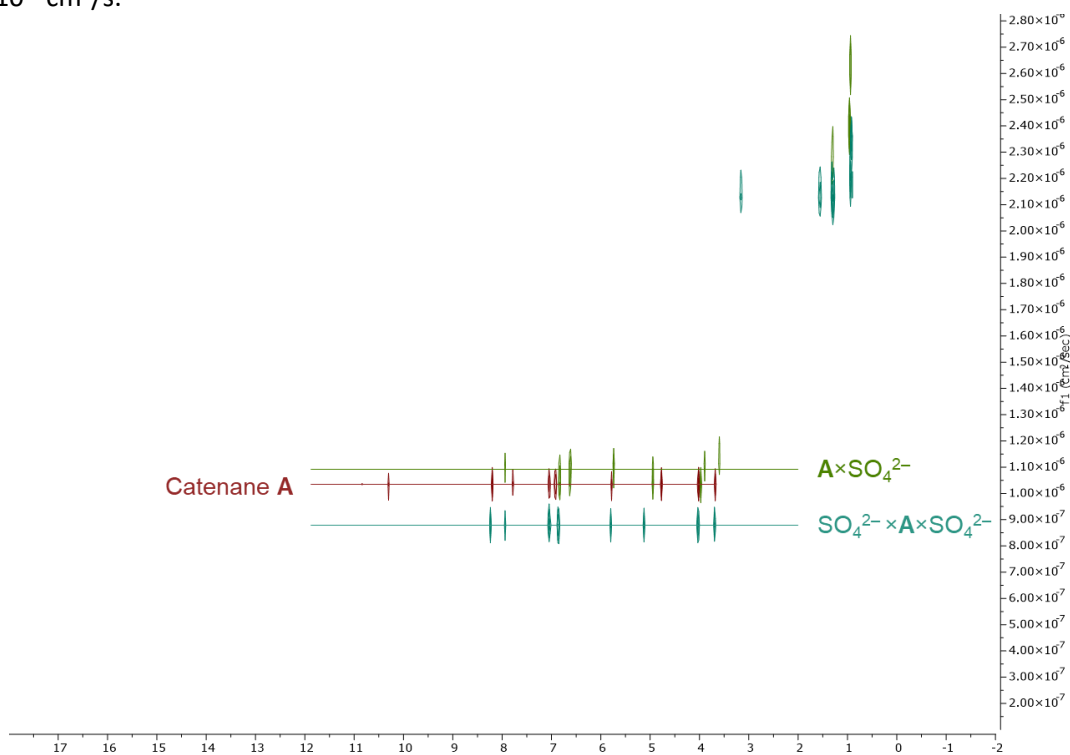

**Figure S17.** Superimposed DOSY spectra of catenane **A** in the presence of 0, 1, or 2.5 equivalent of TBA<sub>2</sub>SO<sub>4</sub> in DMSO-d<sub>6</sub>. Concentration of **A**: 0.002 M. Temperature: 298 K.

## 5. Binding Studies

### 5.1 $^1\text{H}$ NMR Titrations

#### General Procedure

All the reagents were weighted separately on a Mettler Toledo Excellence XA105DU analytical balance (readability 0.01 mg) in screw-capped vials sealed with Teflon-covered septa. DMSO/H<sub>2</sub>O mixtures were obtained using Milli-Q H<sub>2</sub>O and their concentrations were expressed as weight-weight percentage. All the solvent/solution manipulations were done using gas-tight Hamilton glass syringes. Titrants were prepared by dissolving appropriate salts in the solution of the receptor (unless specified otherwise), in order to avoid dilution of the receptor during titration. Titrations were performed in screw-capped NMR tubes sealed with Teflon-covered septa, by adding aliquots of the titrant solution to the receptor solution (0.600 mL, 2 mM) and recording  $^1\text{H}$  NMR spectra after each addition. The NMR spectra were measured on Agilent 400 MHz spectrometer. The  $^1\text{H}$  NMR titration data were fitted with WinEQNMR2 software when possible. Association constants and chemical shifts of both 1:1 and 1:2 complexes were set as free parameters for fitting, whereas chemical shifts of free ligands were constrained to be equal to experimentally measured values.

#### 5.1.1 $^1\text{H}$ NMR titration of 0.001 M solution of catenane **A** in DMSO-d<sub>6</sub> + 0.5% H<sub>2</sub>O with 0.015 M (TBA)<sub>2</sub>SO<sub>4</sub>.

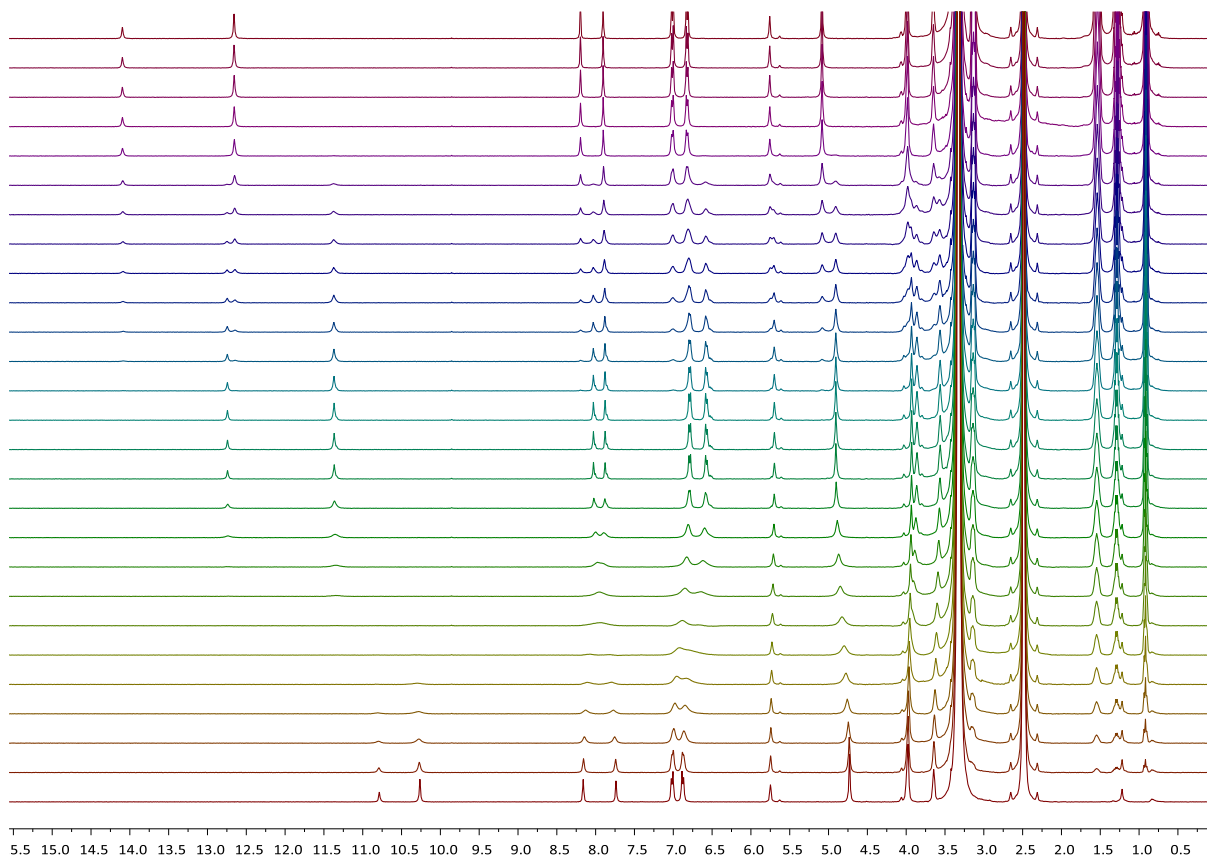

**Figure S18.** Stack of  $^1\text{H}$  NMR spectra obtained during titration of 0.001 M solution of catenane **A** in DMSO-d<sub>6</sub> + 0.5% H<sub>2</sub>O with 0.015 M (TBA)<sub>2</sub>SO<sub>4</sub>.

**5.1.2**  $^1\text{H}$  NMR titration of 0.0001 M solution of catenane **A** in  $\text{DMSO-d}_6/\text{H}_2\text{O}$  9:1 with 0.0015 M  $(\text{TBA})_2\text{SO}_4$ . Water suppression (wet1D) was used.

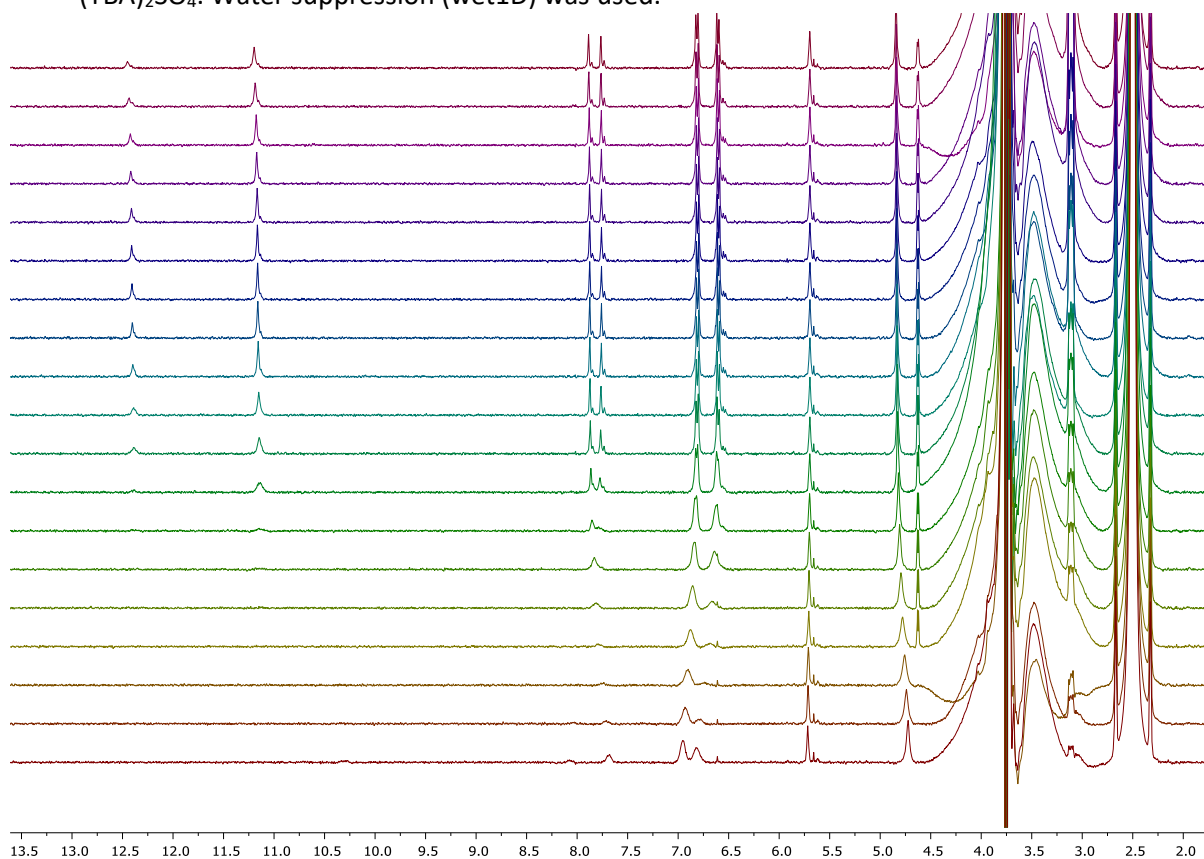

**Figure S19.** Stack of  $^1\text{H}$  NMR (wet 1D suppression) spectra obtained during titration of 0.0001 M solution of catenane **A** in  $\text{DMSO-d}_6/\text{H}_2\text{O}$  9:1 with 0.0015 M  $(\text{TBA})_2\text{SO}_4$ .

**Table S1.** Chemical shifts of proton signals obtained during titration of 0.0001 M solution of catenane **A** in  $\text{DMSO-d}_6/\text{H}_2\text{O}$  9:1 with 0.0015 M  $(\text{TBA})_2\text{SO}_4$ .

| Equivalents of $(\text{TBA})_2\text{SO}_4$ | $\alpha$ | $\beta$ | 2      | 4       | A      | B      | C      | G      |
|--------------------------------------------|----------|---------|--------|---------|--------|--------|--------|--------|
| 0.00                                       | 10.6893  | 10.2962 | 7.6607 | 8.0934  | 4.7078 | 6.9746 | 6.8409 | 5.7218 |
| 0.10                                       | 10.6946  | 10.307  | 7.6839 | 8.0674  | 4.7238 | 6.9522 | 6.8175 | 5.7181 |
| 0.20                                       | 10.7041  | 10.3501 | 7.7106 | 8.0354  | 4.7399 | 6.9296 | 6.7902 | 5.7135 |
| 0.29                                       | 11.027   | 10.3504 | 7.7559 | 7.9674  | 4.7572 | 6.8962 | 6.7489 | 5.7116 |
| 0.40                                       | broad    | broad   | 7.7881 | overlap | 4.7786 | 6.8750 | 6.6887 | 5.7074 |

|      |         |         |        |         |        |        |        |        |
|------|---------|---------|--------|---------|--------|--------|--------|--------|
| 0.50 | broad   | broad   | 7.8122 | overlap | 4.7917 | 6.8567 | 6.6650 | 5.7046 |
| 0.60 | broad   | 11.1379 | 7.8285 | overlap | 4.8082 | 6.8391 | 6.6368 | 5.7015 |
| 0.70 | 12.3811 | 11.1324 | 7.8529 | 7.7859  | 4.8201 | 6.8261 | 6.6221 | 5.699  |
| 0.80 | 12.3938 | 11.1418 | 7.8694 | 7.7735  | 4.8276 | 6.8169 | 6.6113 | 5.6971 |
| 0.90 | 12.3835 | 11.1461 | 7.8696 | 7.7682  | 4.8318 | 6.8121 | 6.6049 | 5.6965 |
| 1.00 | 12.3884 | 11.1509 | 7.8727 | 7.7629  | 4.8336 | 6.8101 | 6.6025 | 5.696  |
| 1.20 | 12.3982 | 11.1572 | 7.8748 | 7.761   | 4.8351 | 6.8089 | 6.6008 | 5.6959 |
| 1.40 | 12.4029 | 11.1605 | 7.8763 | 7.7602  | 4.8355 | 6.8085 | 6.6002 | 5.6959 |
| 1.60 | 12.406  | 11.1629 | 7.8767 | 7.7603  | 4.836  | 6.8085 | 6.6001 | 5.6956 |
| 1.80 | 12.41   | 11.1652 | 7.8771 | 7.76    | 4.8365 | 6.8087 | 6.6004 | 5.6961 |
| 2.00 | 12.4117 | 11.167  | 7.8778 | 7.7599  | 4.8369 | 6.8090 | 6.6007 | 5.6961 |
| 2.50 | 12.4175 | 11.1714 | 7.8798 | 7.7609  | 4.8382 | 6.8098 | 6.6016 | 5.6961 |
| 3.00 | 12.4225 | 11.1771 | 7.8811 | 7.7608  | 4.8393 | 6.8106 | 6.6026 | 5.6962 |
| 4.00 | 12.4368 | 11.1884 | 7.8849 | 7.7639  | 4.8419 | 6.8126 | 6.6050 | 5.6969 |
| 5.00 | 12.4491 | 11.1974 | 7.8881 | 7.7655  | 4.8447 | 6.8148 | 6.6077 | 5.6975 |

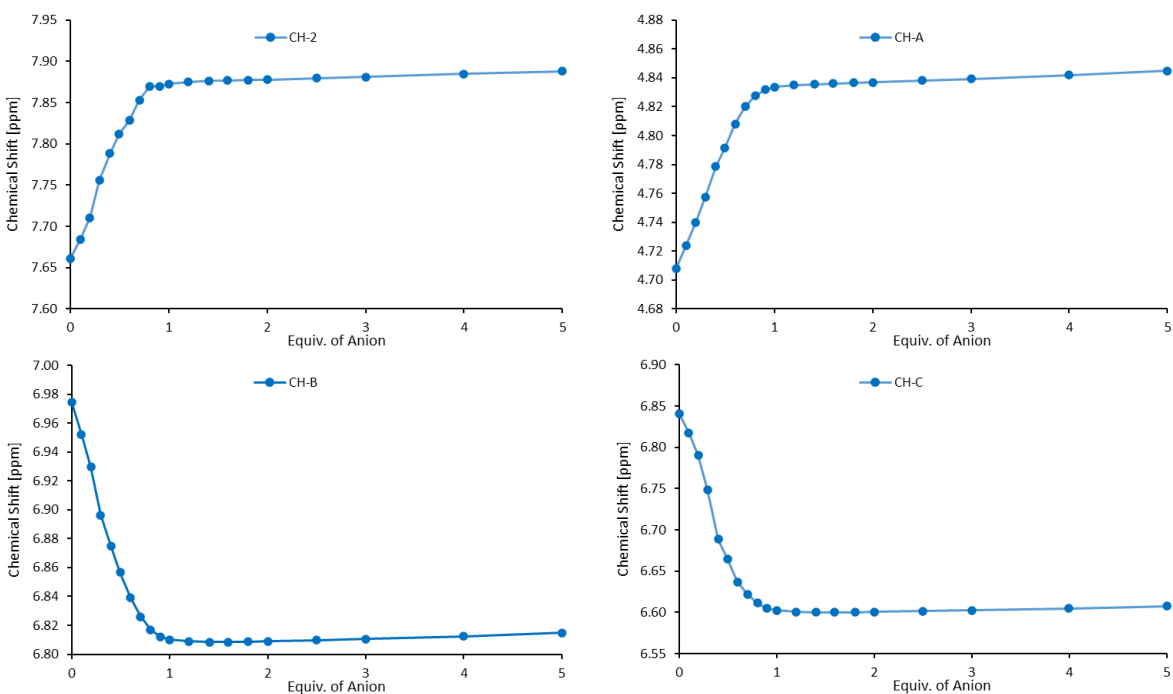

**Figure S20.** Binding isotherms obtained during titration of 0.0001 M solution of catenane **A** in DMSO- $d_6$ /H<sub>2</sub>O 9:1 with 0.0015 M (TBA)<sub>2</sub>SO<sub>4</sub>. No fitting was performed.

**5.1.3**  $^1\text{H}$  NMR titration of 0.0005 M solution of catenane **A** in  $\text{DMSO-d}_6 + 0.5\%$   $\text{H}_2\text{O}$  with 0.0075 M  $\text{TBAH}_2\text{PO}_4$ .

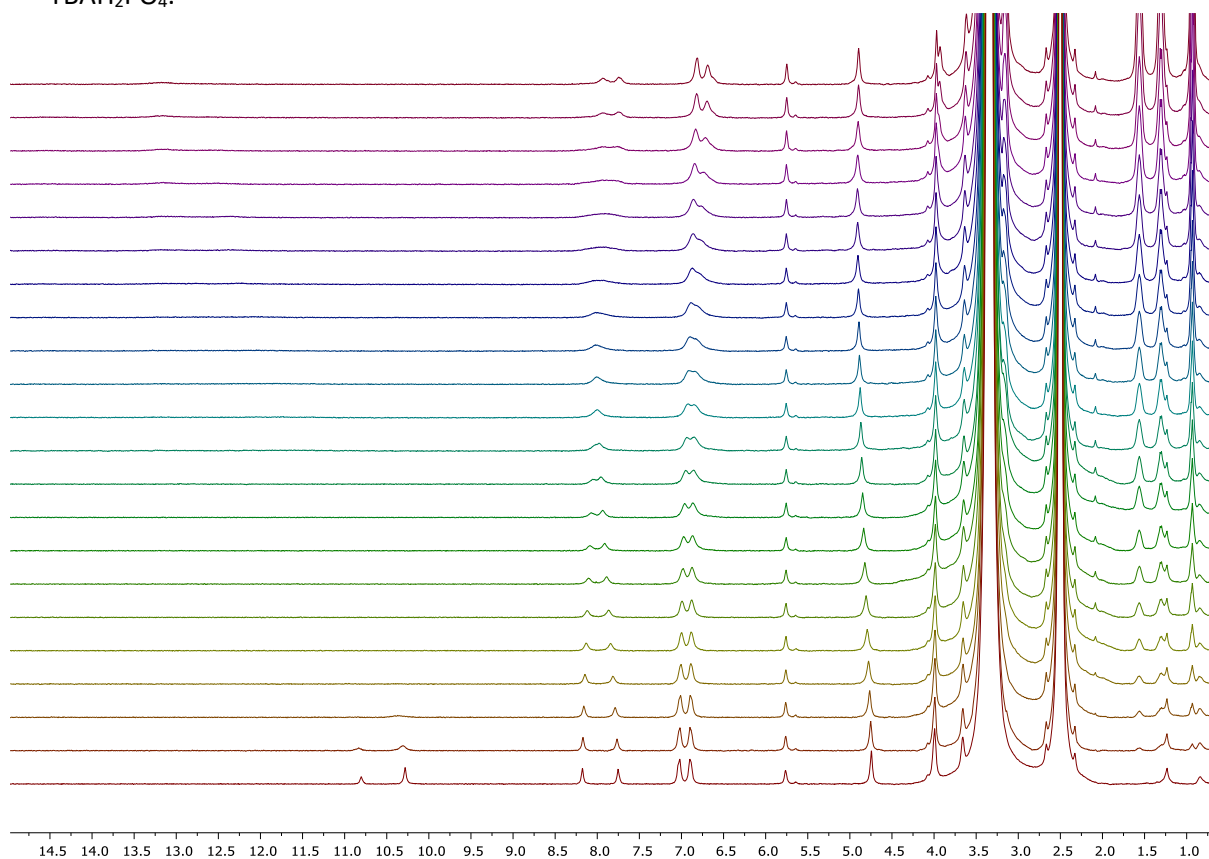

**Figure S21.** Stack of  $^1\text{H}$  NMR spectra obtained during titration of 0.0005 M solution of catenane **A** in  $\text{DMSO-d}_6 + 0.5\%$   $\text{H}_2\text{O}$  with 0.0075 M  $\text{TBAH}_2\text{PO}_4$ .

**Table S2.** Chemical shifts of proton signals obtained during titration of 0.0005 M solution of catenane **A** in  $\text{DMSO-d}_6 + 0.5\%$   $\text{H}_2\text{O}$  with 0.0075 M  $\text{TBAH}_2\text{PO}_4$ .

| Equivalents of $\text{TBA}_2\text{HPO}_4$ | $\alpha$ | $\beta$ | 2      | 4      | A      | B      | C      | D&F    | E      | G      |
|-------------------------------------------|----------|---------|--------|--------|--------|--------|--------|--------|--------|--------|
| 0.00                                      | 10.8034  | 10.2819 | 7.7524 | 8.1765 | 4.7446 | 7.027  | 6.8938 | 3.9921 | 3.6596 | 5.7634 |
| 0.10                                      | 10.8323  | 10.31   | 7.7644 | 8.1698 | 4.752  | 7.023  | 6.8916 | 3.9905 | 3.6583 | 5.7619 |
| 0.20                                      | 10.8753  | 10.3704 | 7.7886 | 8.1583 | 4.7649 | 7.0164 | 6.8881 | 3.9893 | 3.6567 | 5.7613 |
| 0.29                                      | 10.9696  | 10.4453 | 7.8138 | 8.146  | 4.7784 | 7.0095 | 6.8861 | 3.9877 | 3.6555 | 5.7593 |
| 0.40                                      | broad    | broad   | 7.8406 | 8.1308 | 4.7935 | 6.9996 | 6.8824 | 3.9866 | 3.6524 | 5.7595 |
| 0.50                                      | broad    | broad   | 7.8636 | 8.1197 | 4.8076 | 6.9913 | 6.8783 | 3.9852 | 3.6509 | 5.7585 |
| 0.60                                      | broad    | broad   | 7.8894 | 8.1018 | 4.8213 | 6.9822 | 6.8737 | 3.9841 | 3.6496 | 5.7575 |
| 0.70                                      | broad    | broad   | 7.9127 | 8.0875 | 4.8352 | 6.9699 | 6.867  | 3.983  | 3.6484 | 5.7562 |
| 0.80                                      | broad    | broad   | 7.9342 | 8.0717 | 4.8476 | 6.961  | 6.8628 | 3.9822 | 3.6459 | 5.7565 |
| 0.90                                      | broad    | broad   | 7.9563 | 8.0449 | 4.8583 | 6.9503 | 6.8571 | 3.9809 | 3.6447 | 5.756  |
| 1.00                                      | broad    | broad   | 7.9769 | 8.0168 | 4.8683 | 6.9329 | 6.849  | 3.9809 | 3.6429 | 5.7553 |
| 1.10                                      | broad    | broad   | 7.9996 | 7.9996 | 4.8777 | 6.9245 | 6.8482 | 3.9802 | 3.6426 | 5.755  |

|      |       |       |         |         |        |        |        |        |        |        |
|------|-------|-------|---------|---------|--------|--------|--------|--------|--------|--------|
| 1.20 | broad | broad | overlap | overlap | 4.885  | 6.9047 | 6.8351 | 3.9793 | 3.6409 | 5.7546 |
| 1.30 | broad | broad | overlap | overlap | 4.8927 | 6.897  | 6.831  | 3.9787 | 3.6385 | 5.7549 |
| 1.40 | broad | broad | 8.0179  | 7.9573  | 4.8971 | 6.8848 | 6.8186 | 3.9777 | 3.6371 | 5.7546 |
| 1.60 | broad | broad | 8.0139  | 7.927   | 4.9043 | 6.8714 | broad  | 3.9769 | 3.6359 | 5.7543 |
| 1.80 | broad | broad | broad   | broad   | 4.9069 | 6.8649 | 6.7867 | 3.9764 | 3.6337 | 5.753  |
| 2.00 | broad | broad | 8.0047  | 7.8684  | 4.9083 | 6.8554 | 6.7639 | 3.9756 | 3.6324 | 5.7527 |
| 2.50 | broad | broad | 7.967   | 7.8206  | 4.9068 | 6.8414 | 6.7336 | 3.9744 | 3.6295 | 5.7522 |
| 3.00 | broad | broad | 7.9375  | 7.76    | 4.9018 | 6.832  | 6.7111 | 3.973  | 3.6252 | 5.7512 |
| 4.00 | broad | broad | 7.9286  | 7.7418  | 4.897  | 6.8175 | 6.6948 | 3.9719 | 3.6206 | 5.7493 |
| 5.00 | broad | broad | 7.9306  | 7.7405  | 4.8956 | 6.815  | 6.687  | 3.9702 | 3.6162 | 5.7494 |

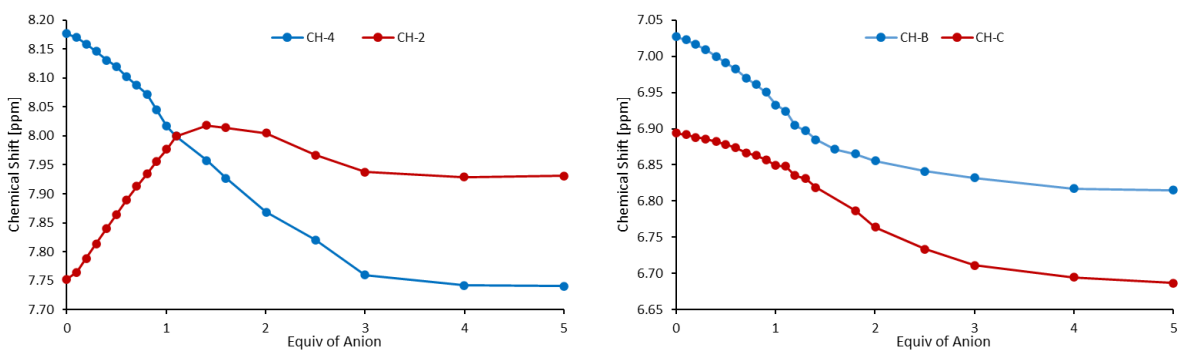

**Figure S22.** Binding isotherms obtained during titration of 0.0005 M solution of catenane **A** in DMSO- $d_6$  + 0.5%  $H_2O$  with 0.0075 M TBAH $_2$ PO $_4$ . No fitting was performed.

**5.1.4**  $^1\text{H}$  NMR titration of 0.0005 M solution of catenane **A** in  $\text{DMSO-d}_6 + 0.5\%$   $\text{H}_2\text{O}$  with 0.0075 M TBAPhCOO.

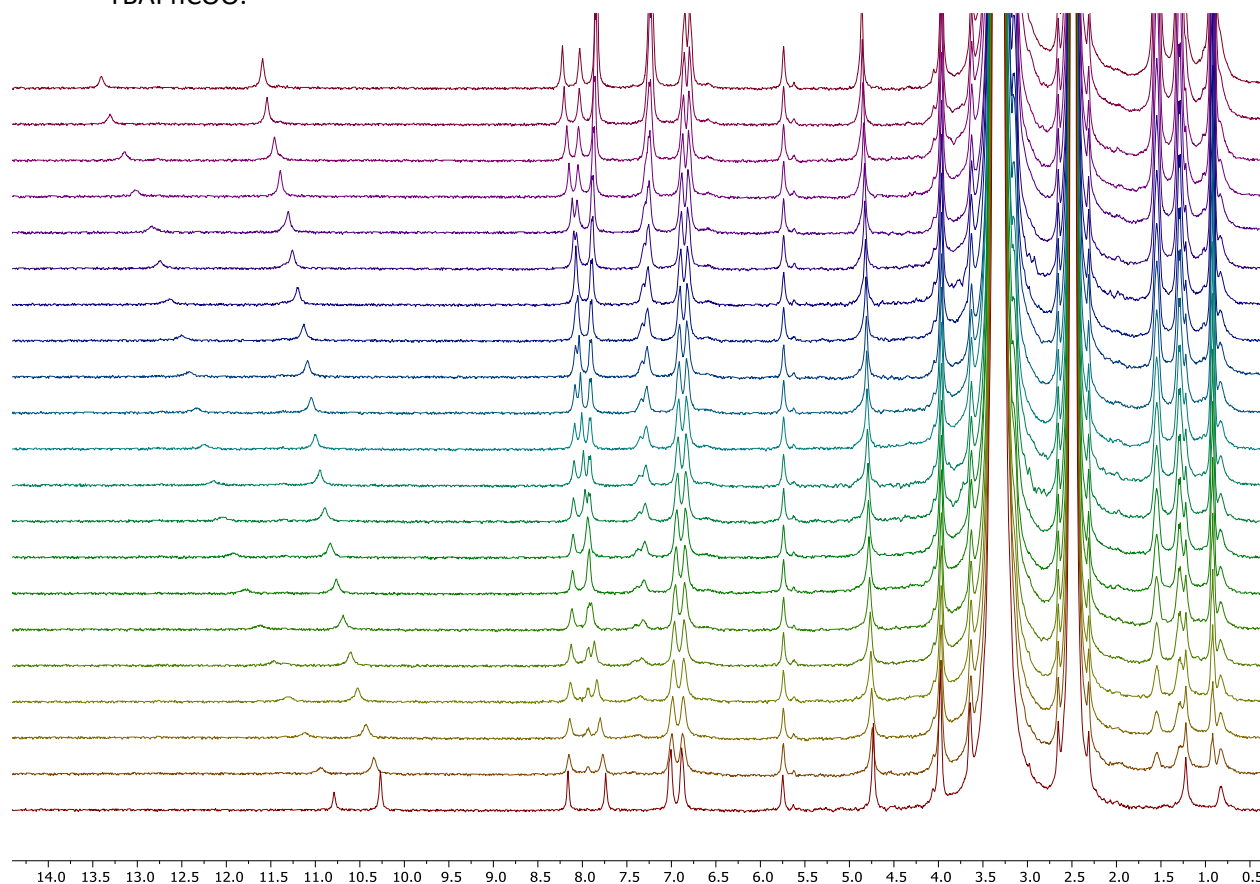

**Figure S23.** Stack of  $^1\text{H}$  NMR spectra obtained during titration of 0.0005 M solution of catenane **A** in  $\text{DMSO-d}_6 + 0.5\%$   $\text{H}_2\text{O}$  with 0.0075 M TBAPhCOO.

**Table S3.** Chemical shifts of proton signals obtained during titration of 0.0005 M solution of catenane **A** in  $\text{DMSO-d}_6 + 0.5\%$   $\text{H}_2\text{O}$  with 0.0075 M TBAPhCOO.

| Equivalents of TBAPhCOO | $\alpha$ | $\beta$ | 2      | 4      | A      | B      | C      | D&F    | E      | G      |
|-------------------------|----------|---------|--------|--------|--------|--------|--------|--------|--------|--------|
| 0.00                    | 10.8045  | 10.2822 | 7.7528 | 8.1759 | 4.7452 | 7.0262 | 6.8933 | 3.9912 | 3.6587 | 5.7623 |
| 0.10                    | 10.9508  | 10.3564 | 7.7839 | 8.1647 | 4.7572 | 7.0119 | 6.8857 | 3.9854 | 3.6493 | 5.7575 |
| 0.20                    | 11.1228  | 10.4475 | 7.8162 | 8.1564 | 4.7644 | 7.0016 | 6.8794 | 3.9846 | 3.648  | 5.757  |
| 0.30                    | 11.3225  | 10.5383 | 7.8492 | 8.146  | 4.7739 | 6.992  | 6.8727 | 3.9833 | 3.647  | 5.7559 |
| 0.40                    | 11.4857  | 10.6215 | 7.88   | 8.1388 | 4.7807 | 6.9807 | 6.8674 | 3.9822 | 3.6467 | 5.7552 |
| 0.50                    | 11.636   | 10.7015 | 7.914  | 8.1324 | 4.7874 | 6.972  | 6.8615 | 3.9813 | 3.6449 | 5.7531 |
| 0.60                    | 11.7966  | 10.7807 | 7.9362 | 8.1257 | 4.7952 | 6.9615 | 6.8573 | 3.9817 | 3.6449 | 5.7541 |
| 0.70                    | 11.9353  | 10.8479 | 7.9538 | 8.1189 | 4.801  | 6.9556 | 6.8534 | 3.9821 | 3.6443 | 5.7558 |
| 0.80                    | 12.0549  | 10.9093 | 7.9846 | 8.1132 | 4.806  | 6.9482 | 6.8487 | 3.9803 | 3.646  | 5.7534 |
| 0.90                    | 12.1556  | 10.9621 | 8.0037 | 8.1083 | 4.8111 | 6.9414 | 6.8443 | 3.9803 | 3.6447 | 5.7555 |
| 1.00                    | 12.267   | 11.0153 | 8.0216 | 8.1022 | 4.8165 | 6.936  | 6.8422 | 3.9798 | 3.644  | 5.7533 |

|      |         |         |        |        |        |        |        |        |        |        |
|------|---------|---------|--------|--------|--------|--------|--------|--------|--------|--------|
| 1.10 | 12.3436 | 11.06   | 8.0358 | 8.0968 | 4.821  | 6.931  | 6.839  | 3.9798 | 3.6443 | 5.7537 |
| 1.20 | 12.436  | 11.1014 | 8.0521 | 8.0926 | 4.8242 | 6.9262 | 6.8365 | 3.9795 | 3.6414 | 5.7544 |
| 1.35 | 12.5209 | 11.147  | 8.0672 | 8.0852 | 4.8283 | 6.9212 | 6.8319 | 3.9799 | 3.6439 | 5.754  |
| 1.60 | 12.6491 | 11.212  | 8.087  | 8.087  | 4.8348 | 6.914  | 6.8298 | 3.9794 | 3.6448 | 5.7537 |
| 1.80 | 12.7595 | 11.2713 | 8.1112 | 8.0805 | 4.8417 | 6.9081 | 6.8243 | 3.9789 | 3.6417 | 5.755  |
| 2.00 | 12.855  | 11.3198 | 8.1302 | 8.0736 | 4.8457 | 6.9022 | 6.8211 | 3.9789 | 3.6406 | 5.7549 |
| 2.50 | 13.0388 | 11.4094 | 8.1653 | 8.0647 | 4.8555 | 6.8916 | 6.8155 | 3.9782 | 3.64   | 5.755  |
| 3.00 | 13.1584 | 11.4728 | 8.1895 | 8.0581 | 4.8619 | 6.8841 | 6.8107 | 3.9794 | 3.6401 | 5.7552 |
| 4.00 | 13.3215 | 11.5571 | 8.2192 | 8.0497 | 4.8704 | 6.8734 | 6.8074 | 3.9778 | 3.6404 | 5.755  |
| 5.00 | 13.4205 | 11.6067 | 8.2383 | 8.0448 | 4.8755 | 6.8674 | 6.8028 | 3.979  | 3.6415 | 5.7538 |

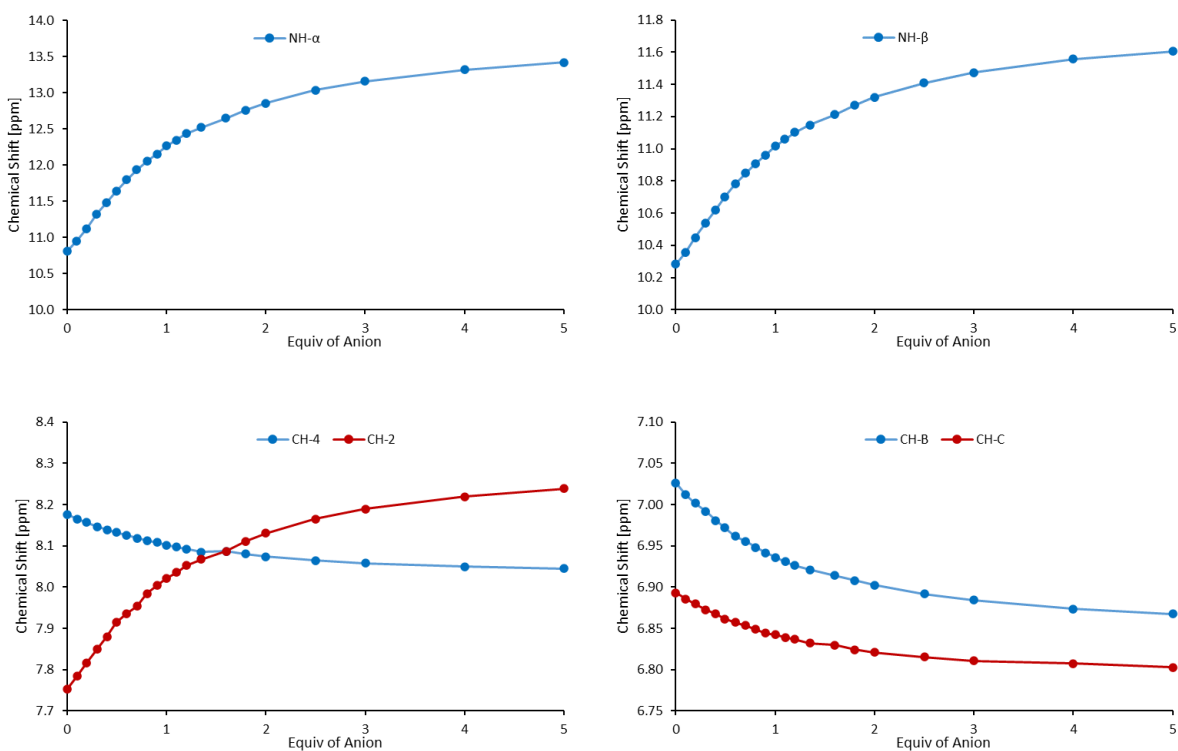

**Figure S24.** Binding isotherms obtained during titration of 0.0005 M solution of catenane **A** in DMSO- $d_6$  + 0.5% H $_2$ O with 0.0075 M TBAPhCOO. No fitting was performed.



**5.1.5**  $^1\text{H}$  NMR titration of 0.001 M solution of catenane **A** in  $\text{DMSO-d}_6 + 0.5\% \text{H}_2\text{O}$  with 0.015 M TBACl.

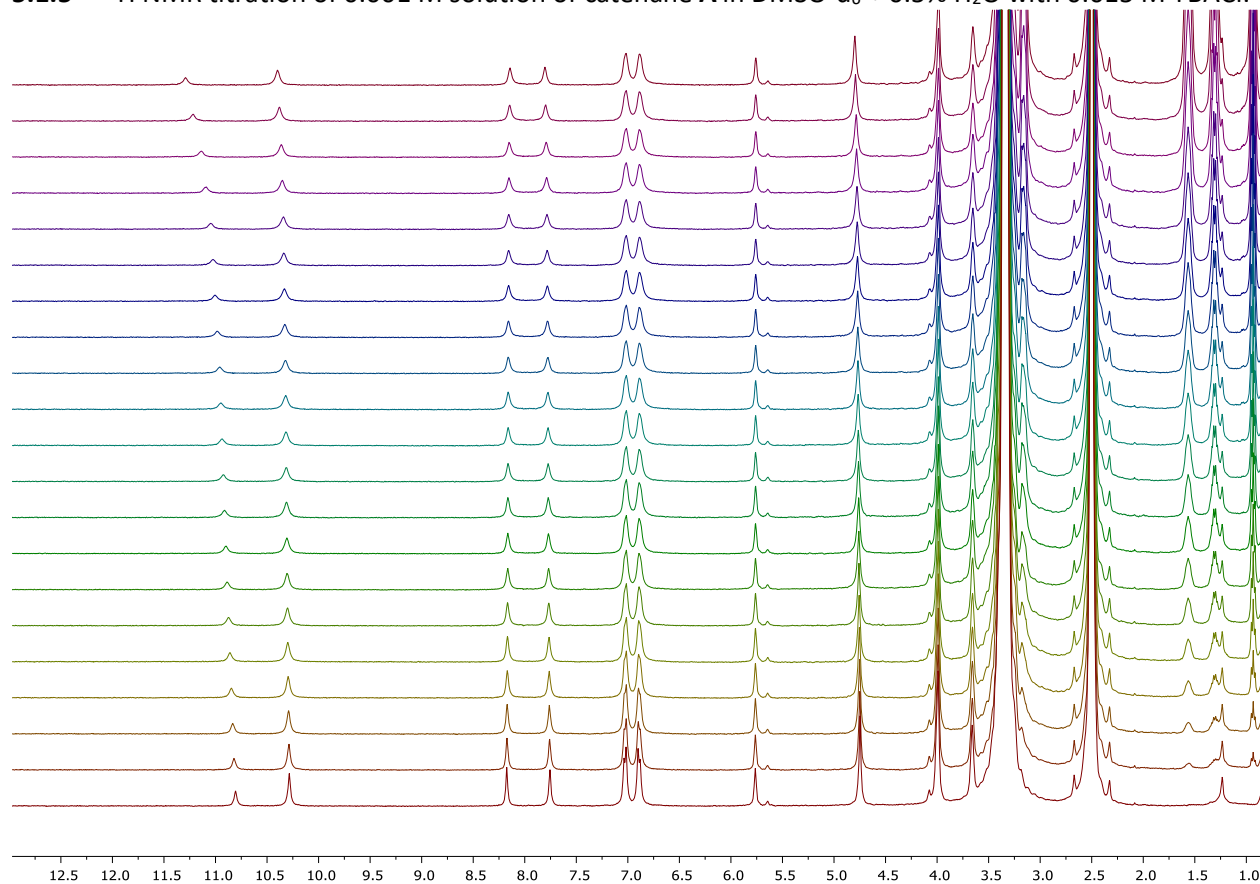

**Figure S25.** Stack of  $^1\text{H}$  NMR spectra obtained during titration of 0.001 M solution of catenane **A** in  $\text{DMSO-d}_6 + 0.5\% \text{H}_2\text{O}$  with 0.015 M TBACl.

**Table S4.** Chemical shifts of proton signals obtained during titration of 0.001 M solution of catenane **A** in  $\text{DMSO-d}_6 + 0.5\% \text{H}_2\text{O}$  with 0.015 M TBACl.

| Equivalents of TBACl | $\alpha$ | $\beta$ | 2      | 4      | A      | B       | C       | D&F    | E      | G      |
|----------------------|----------|---------|--------|--------|--------|---------|---------|--------|--------|--------|
| 0.00                 | 10.8059  | 10.2837 | 7.7555 | 8.1746 | 4.7468 | 7.0277  | 6.8904  | 3.9905 | 3.659  | 5.7627 |
| 0.10                 | 10.821   | 10.2872 | 7.7585 | 8.1721 | 4.7498 | 7.0251  | 6.88905 | 3.9901 | 3.6581 | 5.7623 |
| 0.20                 | 10.8341  | 10.2903 | 7.7611 | 8.1706 | 4.7514 | 7.02455 | 6.88825 | 3.9887 | 3.6571 | 5.7622 |
| 0.29                 | 10.8461  | 10.2942 | 7.763  | 8.1695 | 4.7539 | 7.02325 | 6.8871  | 3.989  | 3.6572 | 5.762  |
| 0.40                 | 10.8601  | 10.2971 | 7.7641 | 8.1673 | 4.7556 | 7.0208  | 6.8872  | 3.9883 | 3.6553 | 5.7613 |
| 0.50                 | 10.8728  | 10.3008 | 7.7668 | 8.1662 | 4.7572 | 7.0212  | 6.8868  | 3.9886 | 3.6556 | 5.7613 |
| 0.60                 | 10.8852  | 10.3042 | 7.7679 | 8.165  | 4.7594 | 7.0195  | 6.8858  | 3.9871 | 3.655  | 5.7607 |
| 0.70                 | 10.8996  | 10.3073 | 7.7698 | 8.1642 | 4.7608 | 7.0199  | 6.8848  | 3.9877 | 3.6558 | 5.7605 |
| 0.80                 | 10.913   | 10.3102 | 7.7716 | 8.1634 | 4.7623 | 7.0191  | 6.885   | 3.9874 | 3.6551 | 5.7605 |
| 0.90                 | 10.9233  | 10.3129 | 7.7725 | 8.1612 | 4.764  | 7.0172  | 6.8836  | 3.9869 | 3.6547 | 5.7599 |
| 1.00                 | 10.9368  | 10.3156 | 7.7737 | 8.1609 | 4.7654 | 7.0186  | 6.8837  | 3.987  | 3.6546 | 5.7599 |
| 1.10                 | 10.9484  | 10.319  | 7.7751 | 8.1601 | 4.7671 | 7.0183  | 6.8839  | 3.9871 | 3.654  | 5.7592 |
| 1.20                 | 10.9584  | 10.3218 | 7.776  | 8.1588 | 4.7681 | 7.0185  | 6.8835  | 3.986  | 3.6536 | 5.7592 |

|      |         |         |        |        |        |        |        |        |        |        |
|------|---------|---------|--------|--------|--------|--------|--------|--------|--------|--------|
| 1.40 | 10.9822 | 10.3271 | 7.7781 | 8.1581 | 4.7703 | 7.018  | 6.8827 | 3.9863 | 3.6531 | 5.7584 |
| 1.60 | 11.0036 | 10.3321 | 7.7801 | 8.1562 | 4.7723 | 7.0172 | 6.8833 | 3.9862 | 3.6527 | 5.7586 |
| 1.80 | 11.024  | 10.3373 | 7.7827 | 8.1563 | 4.7747 | 7.0175 | 6.8853 | 3.9856 | 3.6528 | 5.7588 |
| 2.00 | 11.0472 | 10.3428 | 7.784  | 8.1552 | 4.7766 | 7.0178 | 6.8845 | 3.9861 | 3.6527 | 5.7582 |
| 2.50 | 11.0948 | 10.3537 | 7.7878 | 8.1527 | 4.781  | 7.0187 | 6.8831 | 3.9859 | 3.652  | 5.7588 |
| 3.00 | 11.1371 | 10.3619 | 7.7917 | 8.1502 | 4.784  | 7.0179 | 6.8832 | 3.9858 | 3.6519 | 5.7583 |
| 4.00 | 11.2188 | 10.3801 | 7.7974 | 8.1462 | 4.7911 | 7.0201 | 6.8827 | 3.9853 | 3.6519 | 5.7579 |
| 5.00 | 11.2896 | 10.3968 | 7.8037 | 8.1426 | 4.7971 | 7.0194 | 6.8847 | 3.9855 | 3.6525 | 5.7577 |

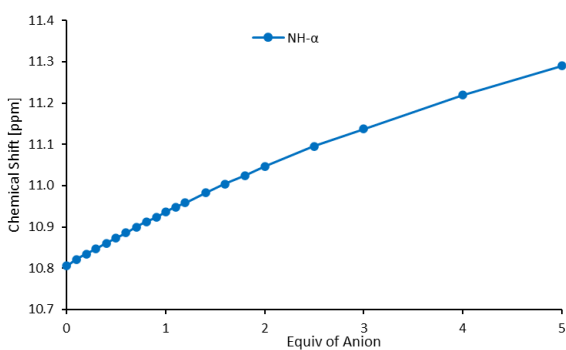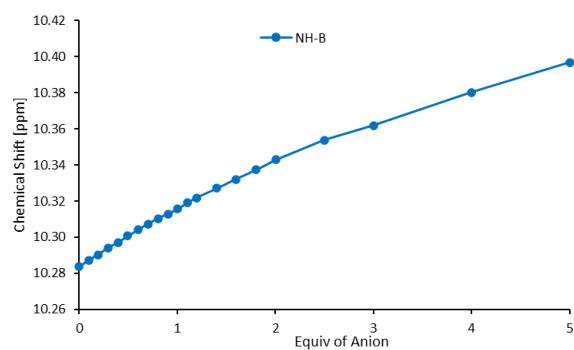

**Figure S26.** Binding isotherms obtained during titration of 0.001 M solution of catenane **A** in DMSO- $d_6$  + 0.5%  $H_2O$  with 0.015 M TBACl. No fitting was performed.

**5.1.6**  $^1\text{H}$  NMR titration of 0.001 M solution of catenane **A** in  $\text{DMSO-d}_6 + 0.5\% \text{H}_2\text{O}$  with 0.015 M  $\text{TBAHSO}_4$ .

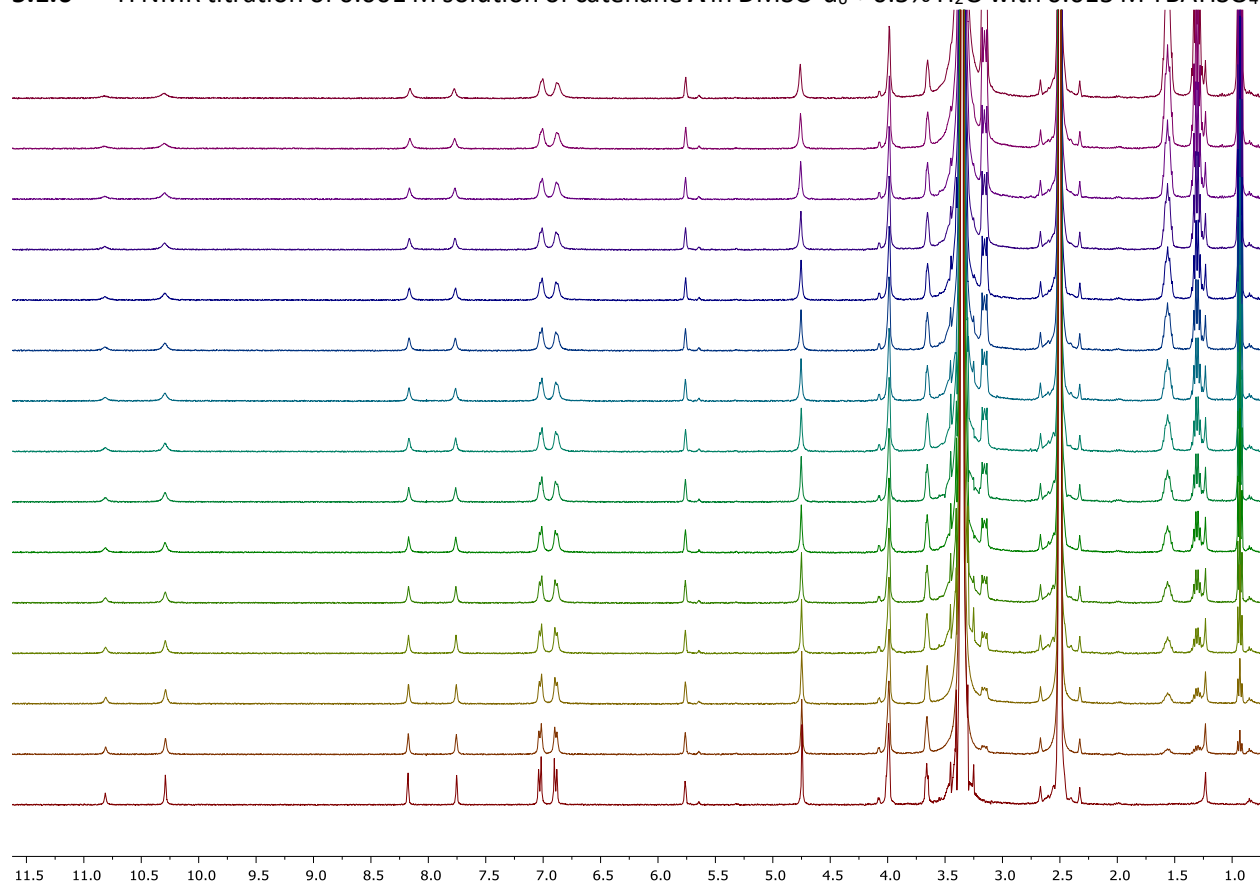

**Figure S27.** Stack of  $^1\text{H}$  NMR spectra obtained during titration of 0.001 M solution of catenane **A** in  $\text{DMSO-d}_6 + 0.5\% \text{H}_2\text{O}$  with 0.015 M  $\text{TBAHSO}_4$ .

**Table S5.** Chemical shifts of proton signals obtained during titration 0.001 M solution of catenane **A** in  $\text{DMSO-d}_6 + 0.5\% \text{H}_2\text{O}$  with 0.015 M  $\text{TBAHSO}_4$ .

| Equivalents of $\text{TBAHSO}_4$ | $\alpha$ | $\beta$ | 2      | 4      | A      | B       | C       | D&F    | E      | G      |
|----------------------------------|----------|---------|--------|--------|--------|---------|---------|--------|--------|--------|
| 0.00                             | 10.8128  | 10.29   | 7.7538 | 8.1774 | 4.7456 | 7.0286  | 6.89205 | 3.9949 | 3.6592 | 5.7632 |
| 0.20                             | 10.8093  | 10.288  | 7.7562 | 8.1748 | 4.7478 | 7.02625 | 6.8891  | 3.9923 | 3.6568 | 5.7619 |
| 0.40                             | 10.8089  | 10.2886 | 7.7564 | 8.173  | 4.7479 | 7.02395 | 6.8876  | 3.993  | 3.6557 | 5.7609 |
| 0.60                             | 10.8112  | 10.2906 | 7.7583 | 8.1723 | 4.7493 | 7.02345 | 6.88715 | 3.9922 | 3.6555 | 5.7613 |
| 0.80                             | 10.8116  | 10.2912 | 7.7597 | 8.1717 | 4.7502 | 7.02235 | 6.8856  | 3.9925 | 3.6558 | 5.7611 |
| 1.00                             | 10.8114  | 10.2917 | 7.7606 | 8.1709 | 4.7514 | 7.02125 | 6.88515 | 3.9916 | 3.6552 | 5.7605 |
| 1.20                             | 10.8108  | 10.2913 | 7.7615 | 8.17   | 4.7523 | 7.0202  | 6.88415 | 3.9906 | 3.655  | 5.7608 |
| 1.40                             | 10.8127  | 10.2905 | 7.7614 | 8.168  | 4.7521 | 7.01945 | 6.88325 | 3.9905 | 3.653  | 5.76   |
| 1.60                             | 10.8126  | 10.2917 | 7.7631 | 8.167  | 4.7536 | 7.0184  | 6.88335 | 3.9919 | 3.654  | 5.7603 |
| 1.80                             | 10.8139  | 10.2925 | 7.7635 | 8.1665 | 4.7535 | 7.0178  | 6.883   | 3.9917 | 3.6535 | 5.7601 |
| 2.00                             | 10.8147  | 10.2935 | 7.7645 | 8.1657 | 4.7551 | 7.0168  | 6.88205 | 3.9918 | 3.653  | 5.7595 |
| 2.50                             | 10.8131  | 10.2939 | 7.7675 | 8.1643 | 4.7556 | 7.0169  | 6.88175 | 3.99   | 3.6528 | 5.7594 |

|      |         |         |        |        |        |         |         |        |        |        |
|------|---------|---------|--------|--------|--------|---------|---------|--------|--------|--------|
| 3.00 | 10.8135 | 10.2925 | 7.7681 | 8.163  | 4.7573 | 7.01445 | 6.87745 | 3.9881 | 3.652  | 5.7593 |
| 4.00 | 10.8189 | 10.2987 | 7.7698 | 8.1593 | 4.7585 | 7.01195 | 6.8745  | 3.9888 | 3.6521 | 5.7591 |
| 5.00 | 10.8186 | 10.3016 | 7.7743 | 8.1591 | 4.7599 | 7.0111  | 6.8759  | 3.9873 | 3.6505 | 5.7583 |

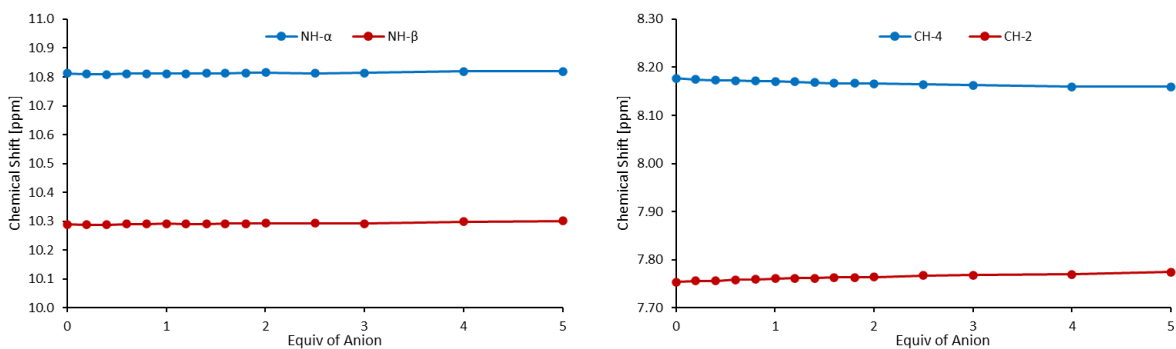

**Figure S28.** Binding isotherms obtained during titration of 0.001 M solution of catenane **A** in DMSO- $d_6$  + 0.5%  $H_2O$  with 0.015 M TBAHSO $_4$ .

**5.1.7**  $^1\text{H}$  NMR titration of 0.001 M solution of macrocycle **3** in  $\text{DMSO-d}_6 + 0.5\% \text{H}_2\text{O}$  with 0.015 M  $\text{TBA}_2\text{SO}_4$ .

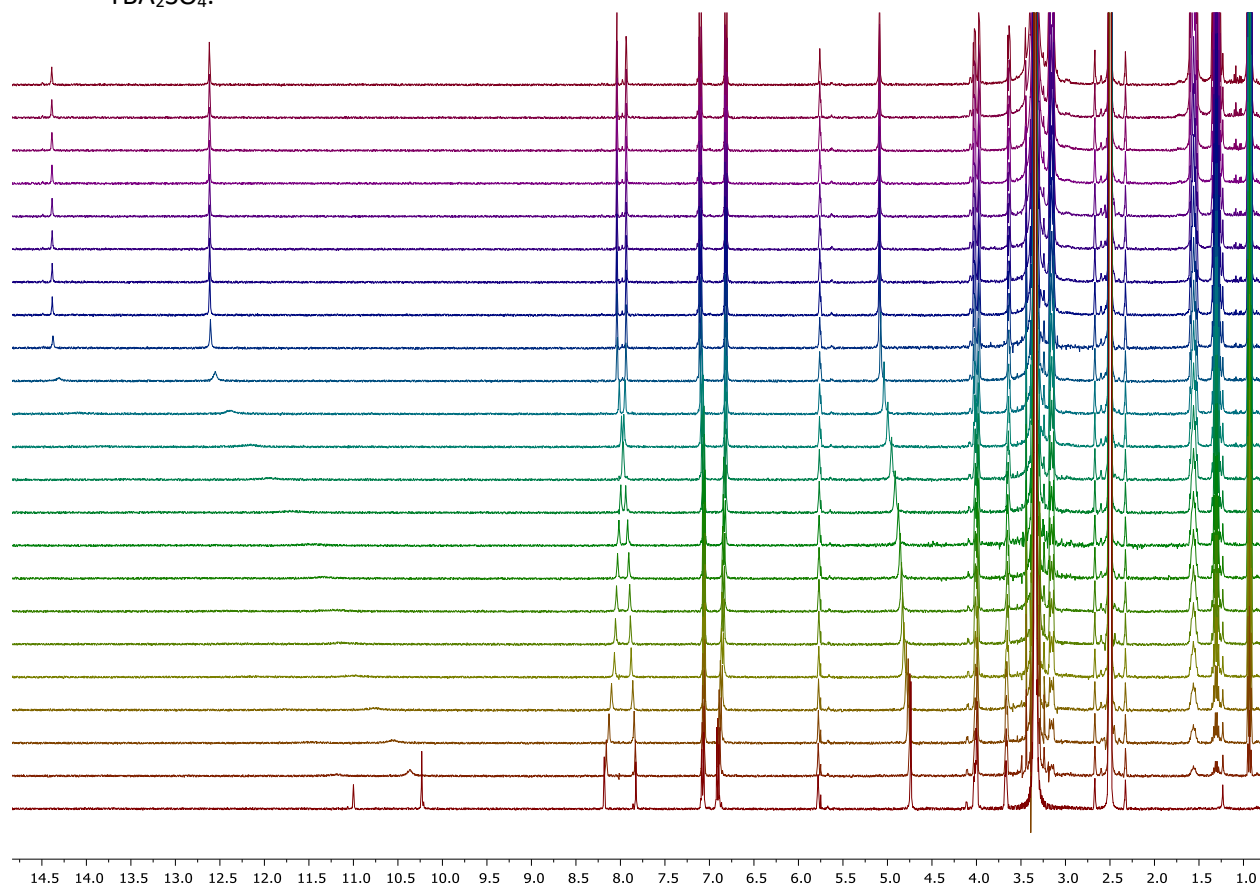

**Figure S29.** Stack of  $^1\text{H}$  NMR spectra obtained during titration of 0.001 M solution of macrocycle **3** in  $\text{DMSO-d}_6 + 0.5\% \text{H}_2\text{O}$  with 0.015 M  $\text{TBA}_2\text{SO}_4$ .

**Table S6.** Chemical shifts of proton signals obtained during titration of 0.001 M solution of macrocycle **3** in  $\text{DMSO-d}_6 + 0.5\% \text{H}_2\text{O}$  with 0.015 M  $\text{TBA}_2\text{SO}_4$ .

| Equivalents of $\text{TBA}_2\text{SO}_4$ | $\alpha$ | $\beta$ | <b>2</b> | <b>4</b> | <b>A</b> | <b>B</b> | <b>C</b> | <b>D</b> | <b>E</b> | <b>F</b> | <b>G</b> |
|------------------------------------------|----------|---------|----------|----------|----------|----------|----------|----------|----------|----------|----------|
| 0.00                                     | 10.9997  | 10.2326 | 7.82535  | 8.18415  | 4.7371   | 7.0749   | 6.9054   | 4.0185   | 3.6691   | 3.9972   | 5.7799   |
| 0.10                                     | 11.1967  | 10.3669 | 7.8346   | 8.1605   | 4.7483   | 7.07     | 6.8938   | 4.0163   | 3.665    | 3.9941   | 5.7773   |
| 0.20                                     | 11.4771  | 10.562  | 7.8473   | 8.12895  | 4.7667   | 7.06515  | 6.879    | 4.0141   | 3.6615   | 3.9917   | 5.7756   |
| 0.29                                     | 11.7863  | 10.7703 | 7.8616   | 8.0989   | 4.7874   | 7.062    | 6.86565  | 4.0127   | 3.6578   | 3.9887   | 5.7734   |
| 0.40                                     | 12.1407  | 11.0073 | 7.8789   | 8.0683   | 4.8152   | 7.06045  | 6.85245  | 4.0118   | 3.6543   | 3.9861   | 5.7711   |
| 0.45                                     | 12.2759  | 11.1359 | 7.8878   | 8.0553   | 4.829    | 7.06045  | 6.8472   | 4.0118   | 3.6524   | 3.9849   | 5.7706   |
| 0.50                                     | 12.4256  | 11.2122 | 7.8961   | 8.0437   | 4.8421   | 7.0606   | 6.8425   | 4.0116   | 3.6512   | 3.9838   | 5.7695   |
| 0.54                                     | broad    | 11.3339 | 7.9057   | 8.0318   | 4.8571   | 7.06135  | 6.838    | 4.0114   | 3.6496   | 3.9836   | 5.7687   |
| 0.60                                     | broad    | 11.4617 | 7.9182   | 8.0176   | 4.8772   | 7.06285  | 6.83275  | 4.0115   | 3.6479   | 3.982    | 5.7677   |
| 0.70                                     | 13.1603  | 11.7011 | 7.941    | 7.9953   | 4.9137   | 7.06705  | 6.82545  | 4.0127   | 3.6445   | 3.9803   | 5.7661   |
| 0.80                                     | 13.4814  | 11.9441 | 7.9676   | 7.9737   | 4.9536   | 7.07315  | 6.82     | 4.0144   | 3.6421   | 3.9778   | 5.7646   |
| 0.90                                     | 13.813   | 12.1583 | 7.989    | 7.9613   | 4.9953   | 7.0809   | 6.81645  | 4.0166   | 3.6392   | 3.9756   | 5.7635   |

|      |         |         |         |         |        |         |         |        |        |        |        |
|------|---------|---------|---------|---------|--------|---------|---------|--------|--------|--------|--------|
| 1.00 | 14.097  | 12.3854 | 8.0142  | 7.9481  | 5.0378 | 7.09015 | 6.81475 | 4.0194 | 3.6372 | 3.9739 | 5.7626 |
| 1.10 | 14.3085 | 12.5538 | 8.0358  | 7.93795 | 5.0747 | 7.09955 | 6.81455 | 4.0224 | 3.6355 | 3.972  | 5.7616 |
| 1.20 | 14.3749 | 12.6067 | 8.04145 | 7.93515 | 5.0875 | 7.1033  | 6.81455 | 4.0236 | 3.6339 | 3.9715 | 5.7616 |
| 1.40 | 14.3838 | 12.614  | 8.04195 | 7.93475 | 5.089  | 7.104   | 6.8146  | 4.0235 | 3.634  | 3.9712 | 5.7614 |
| 1.60 | 14.3844 | 12.6148 | 8.04185 | 7.9346  | 5.089  | 7.10395 | 6.81455 | 4.0238 | 3.6341 | 3.9706 | 5.7613 |
| 1.80 | 14.3847 | 12.6151 | 8.0419  | 7.93475 | 5.0892 | 7.10415 | 6.81465 | 4.0237 | 3.634  | 3.971  | 5.7613 |
| 2.00 | 14.3853 | 12.6151 | 8.04185 | 7.93465 | 5.089  | 7.1041  | 6.8146  | 4.0236 | 3.634  | 3.9707 | 5.7612 |
| 2.50 | 14.3864 | 12.616  | 8.0419  | 7.9346  | 5.089  | 7.1042  | 6.8146  | 4.0239 | 3.6341 | 3.9708 | 5.7612 |
| 3.00 | 14.3869 | 12.6169 | 8.0419  | 7.93465 | 5.0894 | 7.1043  | 6.81465 | 4.0236 | 3.6341 | 3.971  | 5.7611 |
| 4.00 | 14.3891 | 12.6177 | 8.0418  | 7.93465 | 5.0891 | 7.10435 | 6.8146  | 4.0235 | 3.6338 | 3.9708 | 5.7609 |
| 5.00 | 14.39   | 12.6185 | 8.04175 | 7.93455 | 5.089  | 7.1044  | 6.8145  | 4.0236 | 3.6336 | 3.9708 | 5.7607 |

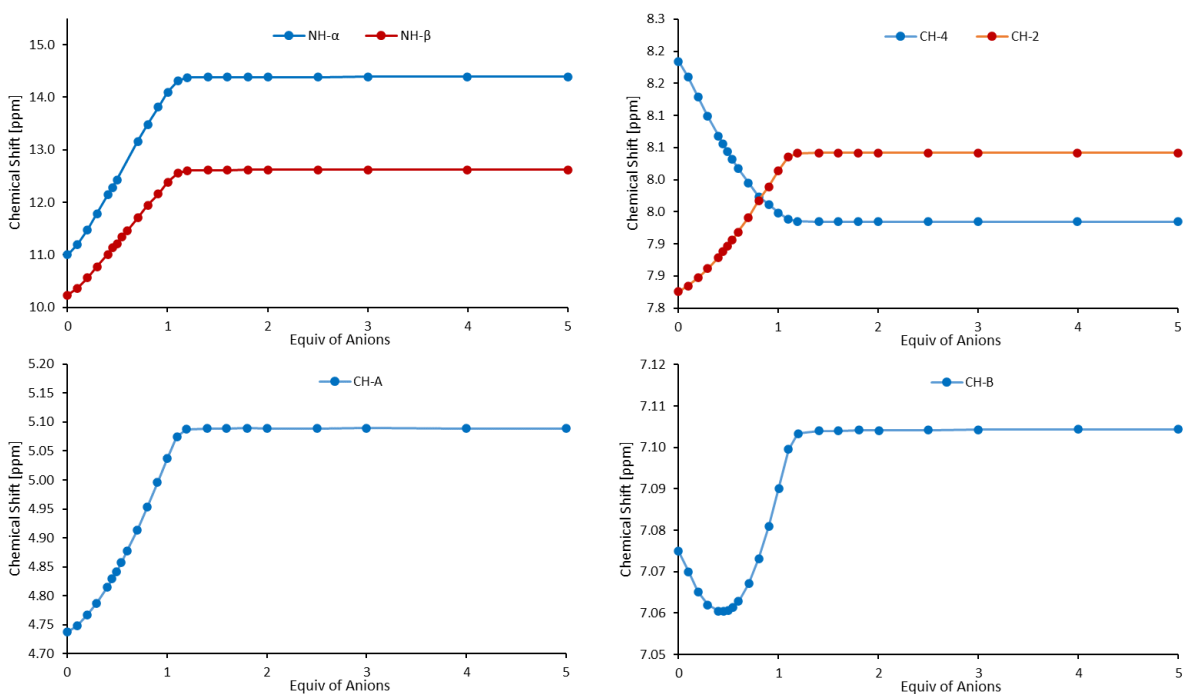

**Figure S30.** Binding isotherms obtained during titration of 0.001 M solution of macrocycle **3** in DMSO- $d_6$  + 0.5% H $_2$ O with 0.015 M TBA $_2$ SO $_4$ .

**5.1.8**  $^1\text{H}$  NMR titration of 0.0001 M solution of macrocycle **3** in  $\text{DMSO-d}_6/\text{D}_2\text{O}$  9:1 with 0.0015 M  $\text{TBA}_2\text{SO}_4$ .

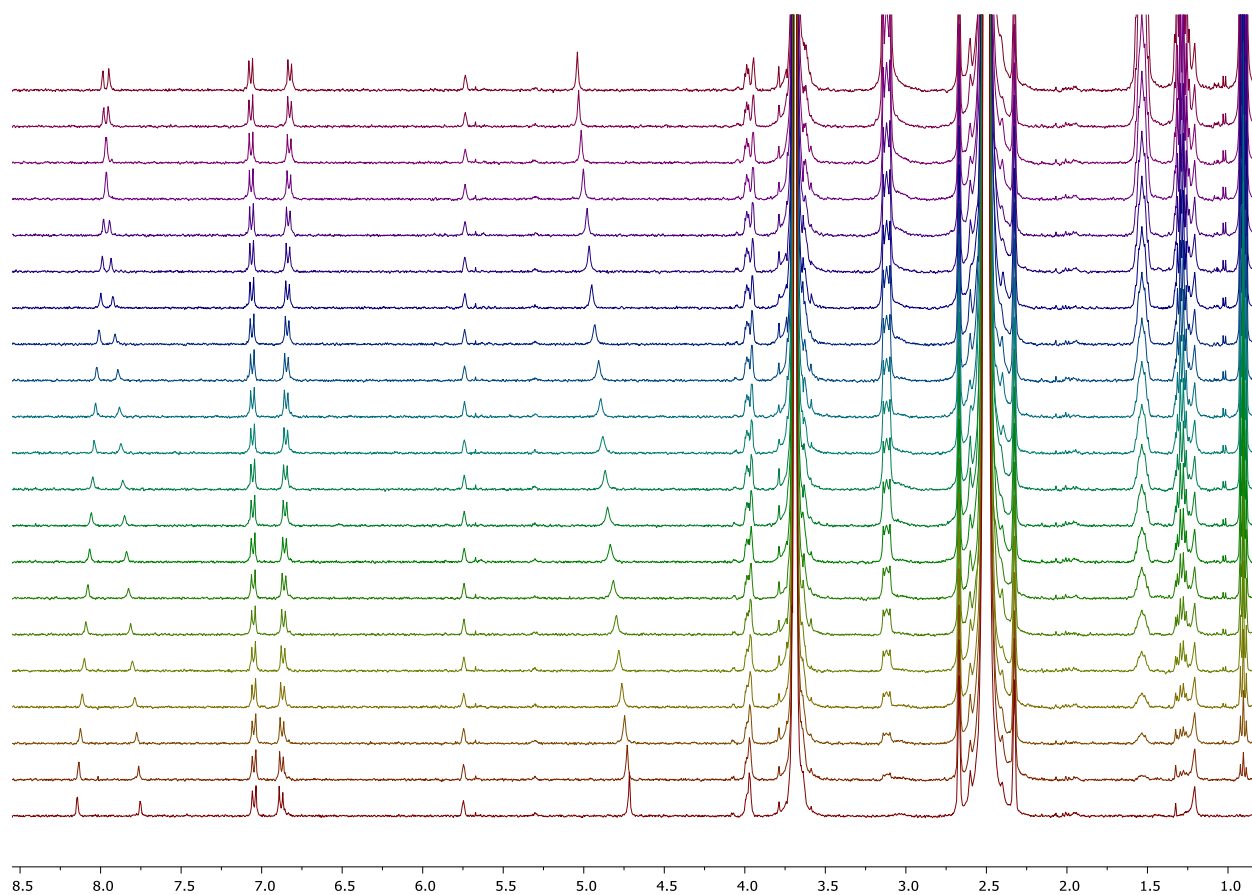

**Figure S31.** Stack of  $^1\text{H}$  NMR spectra obtained during titration of 0.0001 M solution of macrocycle **3** in  $\text{DMSO-d}_6/\text{D}_2\text{O}$  9:1 with 0.0015 M  $\text{TBA}_2\text{SO}_4$ .

**Table S7.** Chemical shifts of proton signals obtained during titration of 0.0001 M solution of macrocycle **3** in  $\text{DMSO-d}_6/\text{D}_2\text{O}$  9:1 with 0.0015 M  $\text{TBA}_2\text{SO}_4$ .

| Equivalents of $\text{TBA}_2\text{SO}_4$ | <b>2</b> | <b>4</b> | <b>A</b> | <b>B</b> | <b>C</b> | <b>D</b> | <b>E</b> | <b>F</b> | <b>G</b> |
|------------------------------------------|----------|----------|----------|----------|----------|----------|----------|----------|----------|
| 0.00                                     | 7.7528   | 8.1454   | 4.7164   | 7.0461   | 6.8797   | 3.9877   | 3.6427   | 3.9684   | 5.7475   |
| 0.10                                     | 7.7631   | 8.1353   | 4.7299   | 7.0468   | 6.8766   | 3.9886   | 3.6382   | 3.9684   | 5.7446   |
| 0.20                                     | 7.7752   | 8.1245   | 4.7458   | 7.0476   | 6.8737   | 3.9876   | 3.6392   | 3.9676   | 5.7457   |
| 0.29                                     | 7.7872   | 8.113    | 4.7631   | 7.0488   | 6.8705   | 3.9875   | 3.6376   | 3.9648   | 5.7443   |
| 0.40                                     | 7.8018   | 8.1003   | 4.7821   | 7.0497   | 6.8667   | 3.9858   | 3.6366   | 3.964    | 5.7447   |
| 0.50                                     | 7.8129   | 8.0909   | 4.7982   | 7.0505   | 6.8643   | 3.9854   | 3.6341   | 3.963    | 5.7431   |
| 0.60                                     | 7.8261   | 8.0782   | 4.8177   | 7.0517   | 6.8610   | 3.9863   | 3.6327   | 3.961    | 5.7432   |
| 0.70                                     | 7.8379   | 8.067    | 4.8346   | 7.0532   | 6.8575   | 3.9874   | 3.6361   | 3.9602   | 5.7418   |
| 0.80                                     | 7.8506   | 8.0578   | 4.8513   | 7.0540   | 6.8547   | 3.9867   | 3.6312   | 3.9585   | 5.742    |
| 0.90                                     | 7.8612   | 8.0484   | 4.8665   | 7.0552   | 6.8521   | 3.9866   | 3.6296   | 3.9586   | 5.7418   |
| 1.00                                     | 7.8723   | 8.0393   | 4.881    | 7.0560   | 6.8496   | 3.9854   | 3.627    | 3.9566   | 5.7411   |
| 1.10                                     | 7.882    | 8.0309   | 4.8943   | 7.0571   | 6.8476   | 3.9864   | 3.6274   | 3.9558   | 5.7401   |

|      |        |        |        |        |        |        |        |        |        |
|------|--------|--------|--------|--------|--------|--------|--------|--------|--------|
| 1.20 | 7.8921 | 8.0233 | 4.9075 | 7.0581 | 6.8454 | 3.9858 | 3.6271 | 3.9555 | 5.7403 |
| 1.40 | 7.9101 | 8.0084 | 4.9322 | 7.0594 | 6.8417 | 3.9847 | 3.6257 | 3.9538 | 5.7393 |
| 1.60 | 7.9233 | 7.9979 | 4.9503 | 7.0605 | 6.8386 | 3.986  | 3.6266 | 3.9519 | 5.7367 |
| 1.80 | 7.9348 | 7.9886 | 4.9663 | 7.0618 | 6.8363 | 3.9868 | 3.6239 | 3.951  | 5.7378 |
| 2.00 | 7.9438 | 7.9811 | 4.9785 | 7.0630 | 6.8345 | 3.9866 | 3.623  | 3.9507 | 5.7374 |
| 2.50 | 7.962  | 7.9661 | 5.0021 | 7.0647 | 6.8308 | 3.9862 | 3.6218 | 3.9483 | 5.7362 |
| 3.00 | 7.9681 | 7.9622 | 5.0156 | 7.0658 | 6.8288 | 3.9864 | 3.6197 | 3.9471 | 5.7353 |
| 4.00 | 7.9808 | 7.9517 | 5.0312 | 7.0670 | 6.8267 | 3.9859 | 3.6197 | 3.9467 | 5.735  |
| 5.00 | 7.9867 | 7.9462 | 5.0394 | 7.0675 | 6.8253 | 3.9875 | 3.6193 | 3.945  | 5.7354 |

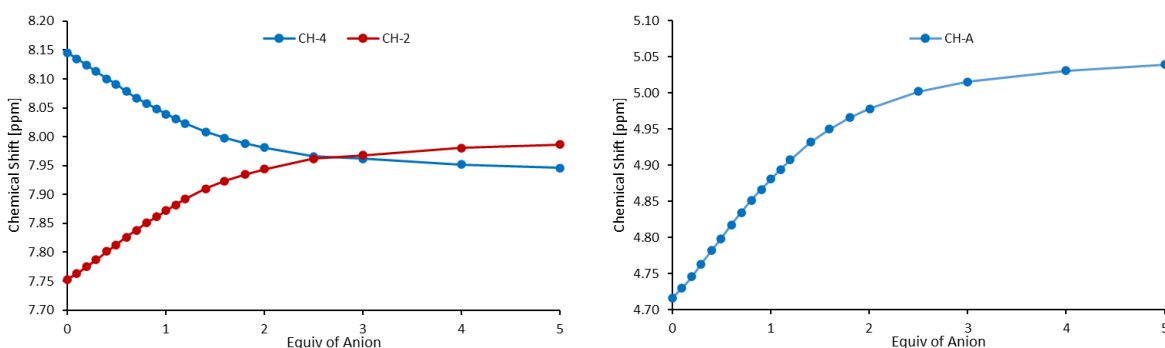

**Figure S32.** Binding isotherms obtained during titration of 0.0001 M solution of macrocycle **3** in DMSO- $d_6$ /D $_2$ O 9:1 with 0.0015 M TBA $_2$ SO $_4$ .

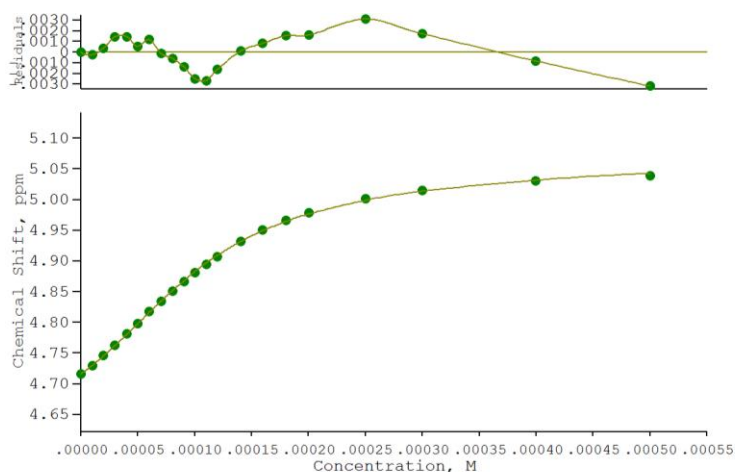

**Figure S33.** Fitting of 2:1 & 1:1 (receptor:anion) model to results of titration of 0.0001 M solution of macrocycle **3** in DMSO- $d_6$ /D $_2$ O 9:1 with 0.0015 M TBA $_2$ SO $_4$  for CH-a protons using WinEQNMR.

Binding constants K derived from averaging the results from fitting of 2:1 & 1:1 (receptor:anion) model to titration results for CH-2, CH-4 and CH-a protons using WinEQNMR:

$$\log K_{1:1} = 4.55, \text{ Std Dev.} = 0.01$$

$$\log K_{1:2} = 3.00, \text{ Std Dev.} = 0.06$$



**5.1.9**  $^1\text{H}$  NMR titration of 0.0002 M solution of macrocycle **3** in  $\text{DMSO-d}_6/\text{D}_2\text{O}$  9:1 with 0.006 M  $\text{TBAH}_2\text{PO}_4$ .

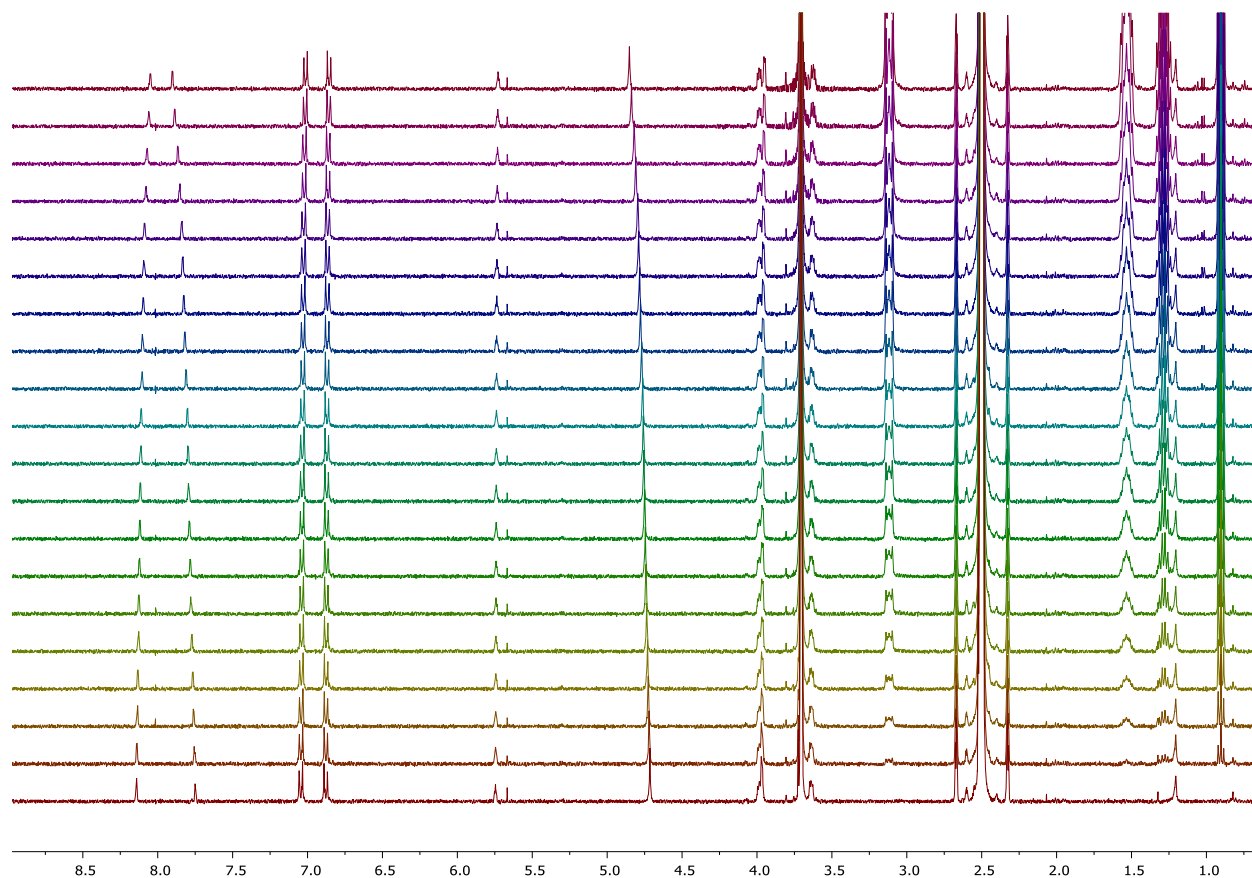

**Figure S34.** Stack of  $^1\text{H}$  NMR spectra obtained during titration of 0.0002 M solution of macrocycle **3** in  $\text{DMSO-d}_6/\text{D}_2\text{O}$  9:1 with 0.006 M  $\text{TBAH}_2\text{PO}_4$ .

**Table S8.** Chemical shifts of proton signals obtained during titration of 0.0002 M solution of macrocycle **3** in  $\text{DMSO-d}_6/\text{D}_2\text{O}$  9:1 with 0.006 M  $\text{TBAH}_2\text{PO}_4$ .

| Equivalents of $\text{TBAH}_2\text{PO}_4$ | 2      | 4      | A      | B      | C      | D      | E      | F      | G      |
|-------------------------------------------|--------|--------|--------|--------|--------|--------|--------|--------|--------|
| 0.00                                      | 7.7479 | 8.1430 | 4.7141 | 7.0444 | 6.8785 | 3.985  | 3.6375 | 3.9675 | 5.7451 |
| 0.20                                      | 7.7537 | 8.1390 | 4.7198 | 7.0429 | 6.8775 | 3.9844 | 3.6372 | 3.9669 | 5.7442 |
| 0.39                                      | 7.7599 | 8.1356 | 4.7252 | 7.0419 | 6.8765 | 3.986  | 3.6368 | 3.9669 | 5.7433 |
| 0.59                                      | 7.7655 | 8.1323 | 4.7303 | 7.0408 | 6.8755 | 3.9853 | 3.6362 | 3.9658 | 5.7429 |
| 0.80                                      | 7.7716 | 8.1285 | 4.7355 | 7.0393 | 6.8749 | 3.985  | 3.6363 | 3.9647 | 5.7419 |
| 0.99                                      | 7.7769 | 8.1253 | 4.7401 | 7.0383 | 6.8742 | 3.9857 | 3.6351 | 3.9642 | 5.7416 |
| 1.20                                      | 7.7824 | 8.1220 | 4.7448 | 7.0372 | 6.8733 | 3.9849 | 3.6351 | 3.9625 | 5.741  |
| 1.41                                      | 7.7876 | 8.1189 | 4.7498 | 7.0361 | 6.8726 | 3.9854 | 3.6344 | 3.9627 | 5.7407 |
| 1.61                                      | 7.7925 | 8.1156 | 4.7544 | 7.0350 | 6.8721 | 3.985  | 3.6339 | 3.9618 | 5.74   |
| 1.81                                      | 7.7972 | 8.1132 | 4.7585 | 7.0343 | 6.8714 | 3.9856 | 3.6341 | 3.9614 | 5.7396 |
| 2.01                                      | 7.8015 | 8.1102 | 4.7623 | 7.0334 | 6.8707 | 3.9848 | 3.634  | 3.9612 | 5.7388 |

|       |        |        |        |        |        |        |        |        |        |
|-------|--------|--------|--------|--------|--------|--------|--------|--------|--------|
| 2.39  | 7.8100 | 8.1055 | 4.7695 | 7.0315 | 6.8695 | 3.9853 | 3.6327 | 3.9598 | 5.7378 |
| 2.81  | 7.8184 | 8.1001 | 4.7771 | 7.0298 | 6.8683 | 3.9842 | 3.632  | 3.9587 | 5.7375 |
| 3.19  | 7.8253 | 8.0957 | 4.7836 | 7.0283 | 6.8673 | 3.984  | 3.6309 | 3.9579 | 5.7363 |
| 3.61  | 7.8326 | 8.0915 | 4.7896 | 7.0268 | 6.8663 | 3.9824 | 3.6319 | 3.9569 | 5.7357 |
| 4.01  | 7.8388 | 8.0876 | 4.7956 | 7.0255 | 6.8652 | 3.9848 | 3.6314 | 3.9567 | 5.7349 |
| 5.00  | 7.8533 | 8.0785 | 4.8084 | 7.0225 | 6.8632 | 3.9849 | 3.6295 | 3.9548 | 5.7334 |
| 6.00  | 7.8654 | 8.0711 | 4.8193 | 7.0199 | 6.8614 | 3.9855 | 3.6277 | 3.9537 | 5.7318 |
| 8.00  | 7.8857 | 8.0588 | 4.8372 | 7.0159 | 6.8585 | 3.9859 | 3.6255 | 3.9509 | 5.7297 |
| 10.00 | 7.9013 | 8.0492 | 4.8515 | 7.0126 | 6.8562 | 3.9852 | 3.6248 | 3.9493 | 5.7281 |

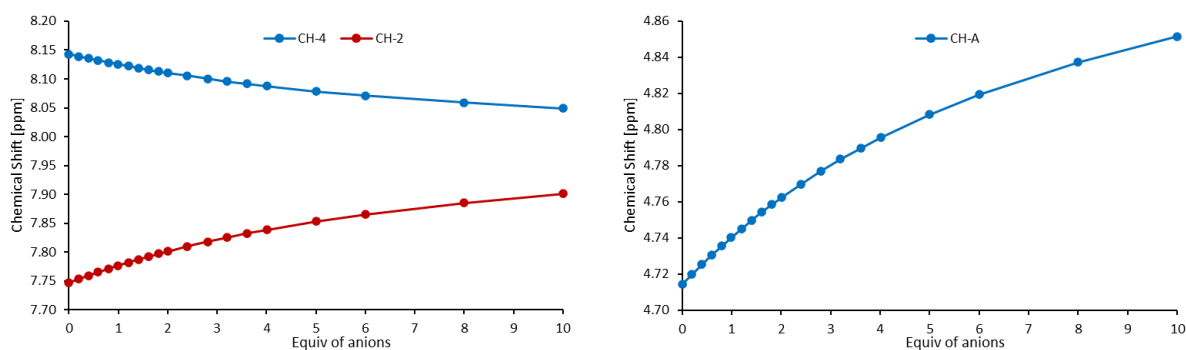

**Figure S35.** Binding isotherms obtained during titration of 0.0002 M solution of macrocycle **3** in DMSO- $d_6$ /D $_2$ O 9:1 with 0.006 M TBAH $_2$ PO $_4$ .

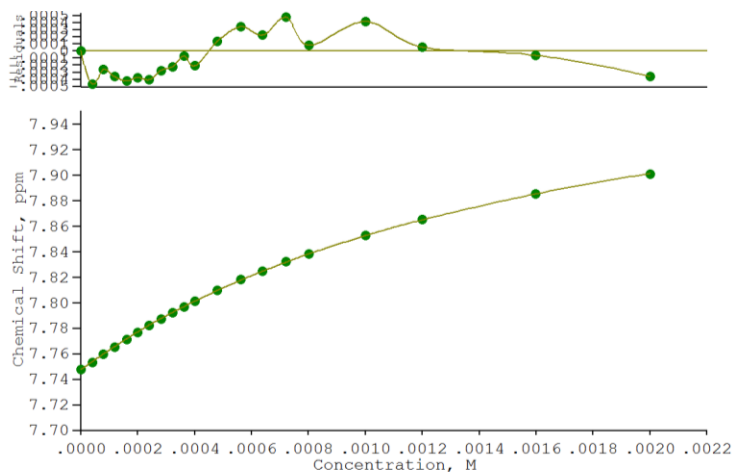

**Figure S36.** Fitting of 1:1 (receptor:anion) model to results of titration of 0.0001 M solution of macrocycle **3** in DMSO- $d_6$ /D $_2$ O 9:1 with 0.0015 M TBA $_2$ SO $_4$  for CH-a protons using WinEQNMR.

Binding constants  $K$  derived from averaging the results from fitting of 1:1 (receptor:anion) model to titration results for CH-2, CH-4, CH-a, CH-b and CH-c protons using WinEQNMR:

$$\log K_{1:1} = 2.84, \text{ Std Dev.} = 0.03$$

**5.1.10**  $^1\text{H}$  NMR titration of 0.0002 M solution of macrocycle **3** in  $\text{DMSO-d}_6/\text{D}_2\text{O}$  9:1 with 0.03 M TBAPhCOO.

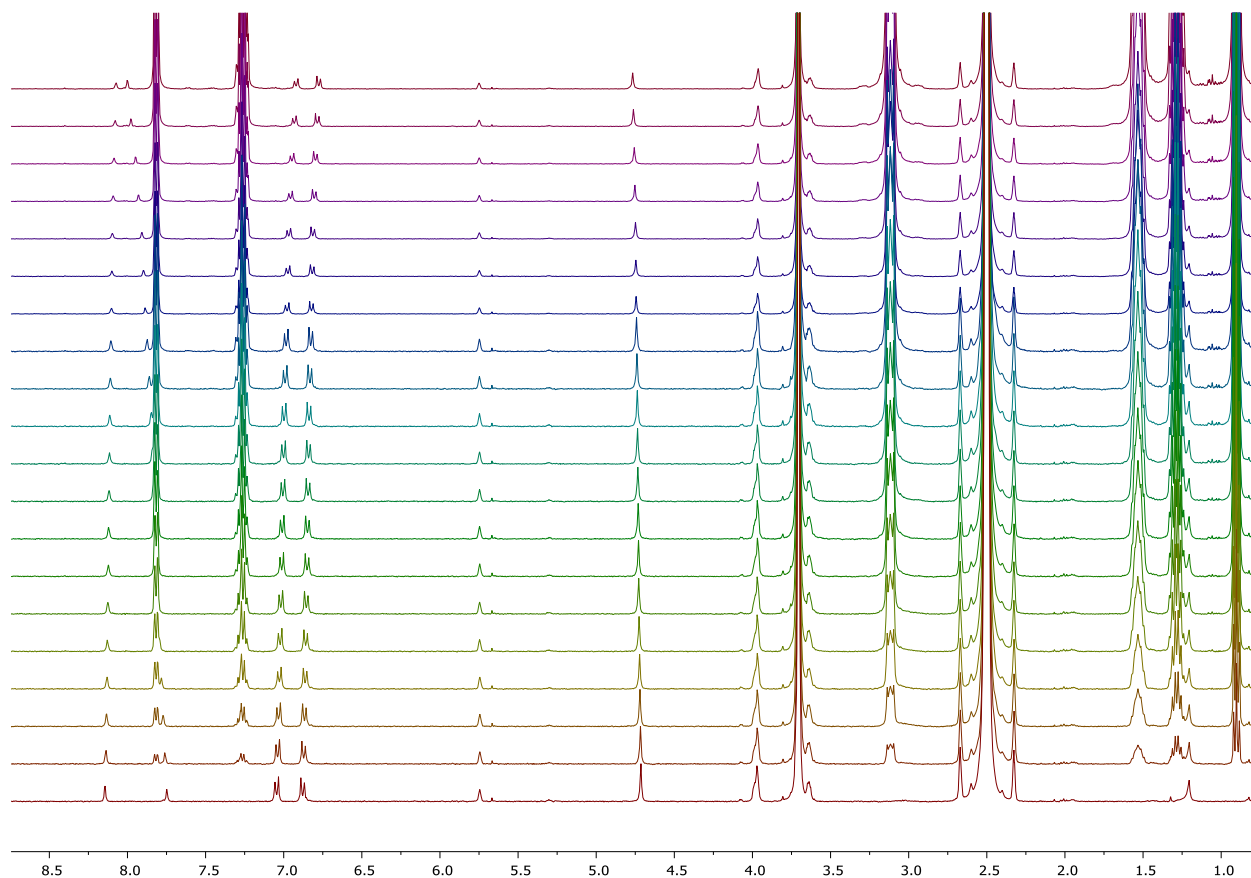

**Figure S37.** Stack of  $^1\text{H}$  NMR spectra obtained during titration of 0.0002 M solution of macrocycle **3** in  $\text{DMSO-d}_6/\text{D}_2\text{O}$  9:1 with 0.03 M TBAPhCOO.

**Table S9.** Chemical shifts of proton signals obtained during titration of 0.0002 M solution of macrocycle **3** in  $\text{DMSO-d}_6/\text{D}_2\text{O}$  9:1 with 0.03 M TBAPhCOO.

| Equivalents of TBAPhCOO | 2       | 4      | A      | B      | C      | D      | E      | F      | G      |
|-------------------------|---------|--------|--------|--------|--------|--------|--------|--------|--------|
| 0.00                    | 7.7468  | 8.1442 | 4.7132 | 7.0446 | 6.8789 | 3.9844 | 3.6375 | 3.9684 | 5.7450 |
| 0.99                    | 7.7602  | 8.1386 | 4.7174 | 7.0387 | 6.8730 | 3.9832 | 3.6390 | 3.9673 | 5.7453 |
| 1.97                    | 7.7722  | 8.1348 | 4.7200 | 7.0333 | 6.8682 | 3.9835 | 3.6378 | 3.9668 | 5.7451 |
| 2.94                    | 7.7829  | 8.1310 | 4.7225 | 7.0279 | 6.8639 | 3.9831 | 3.6356 | 3.9669 | 5.7450 |
| 4.01                    | 7.7941  | 8.1276 | 4.7251 | 7.0227 | 6.8591 | 3.9822 | 3.6351 | 3.9663 | 5.7461 |
| 4.96                    | overlap | 8.1255 | 4.7273 | 7.0179 | 6.8554 | 3.9821 | 3.6353 | 3.9664 | 5.7455 |
| 6.00                    | overlap | 8.1233 | 4.7292 | 7.0133 | 6.8514 | 3.9816 | 3.6350 | 3.9656 | 5.7462 |
| 6.92                    | overlap | 8.1201 | 4.7310 | 7.0093 | 6.8479 | 3.9814 | 3.6357 | 3.9659 | 5.7461 |
| 8.04                    | overlap | 8.1175 | 4.7332 | 7.0045 | 6.8439 | 3.9814 | 3.6345 | 3.9654 | 5.7459 |
| 9.04                    | 7.8401  | 8.1151 | 4.7347 | 7.0005 | 6.8410 | 3.9805 | 3.6360 | 3.9648 | 5.7463 |
| 10.03                   | 7.8478  | 8.1131 | 4.7365 | 6.9970 | 6.8380 | 3.9810 | 3.6342 | 3.9651 | 5.7466 |

|       |        |        |        |        |        |        |        |        |        |
|-------|--------|--------|--------|--------|--------|--------|--------|--------|--------|
| 11.96 | 7.8611 | 8.1096 | 4.7387 | 6.9903 | 6.8322 | 3.9795 | 3.6338 | 3.9643 | 5.7466 |
| 14.05 | 7.8751 | 8.1054 | 4.7416 | 6.9834 | 6.8267 | 3.9789 | 3.6344 | 3.9648 | 5.7473 |
| 15.97 | 7.8857 | 8.1020 | 4.7439 | 6.9776 | 6.8223 | 3.9783 | 3.6323 | 3.9639 | 5.7472 |
| 18.04 | 7.8972 | 8.0988 | 4.7459 | 6.9722 | 6.8174 | 3.9784 | 3.6326 | 3.9636 | 5.7474 |
| 20.04 | 7.9073 | 8.0961 | 4.7483 | 6.9670 | 6.8136 | 3.9776 | 3.6326 | 3.9636 | 5.7477 |
| 25.00 | 7.9293 | 8.0911 | 4.7524 | 6.9560 | 6.8044 | 3.9762 | 3.6317 | 3.9630 | 5.7481 |
| 30.00 | 7.9478 | 8.0860 | 4.7560 | 6.9466 | 6.7971 | 3.9756 | 3.6310 | 3.9629 | 5.7483 |
| 39.98 | 7.9771 | 8.0787 | 4.7618 | 6.9311 | 6.7851 | 3.9751 | 3.6301 | 3.9624 | 5.7492 |
| 50.00 | 7.9996 | 8.0732 | 4.7659 | 6.9199 | 6.7760 | 3.9746 | 3.6291 | 3.9619 | 5.7493 |

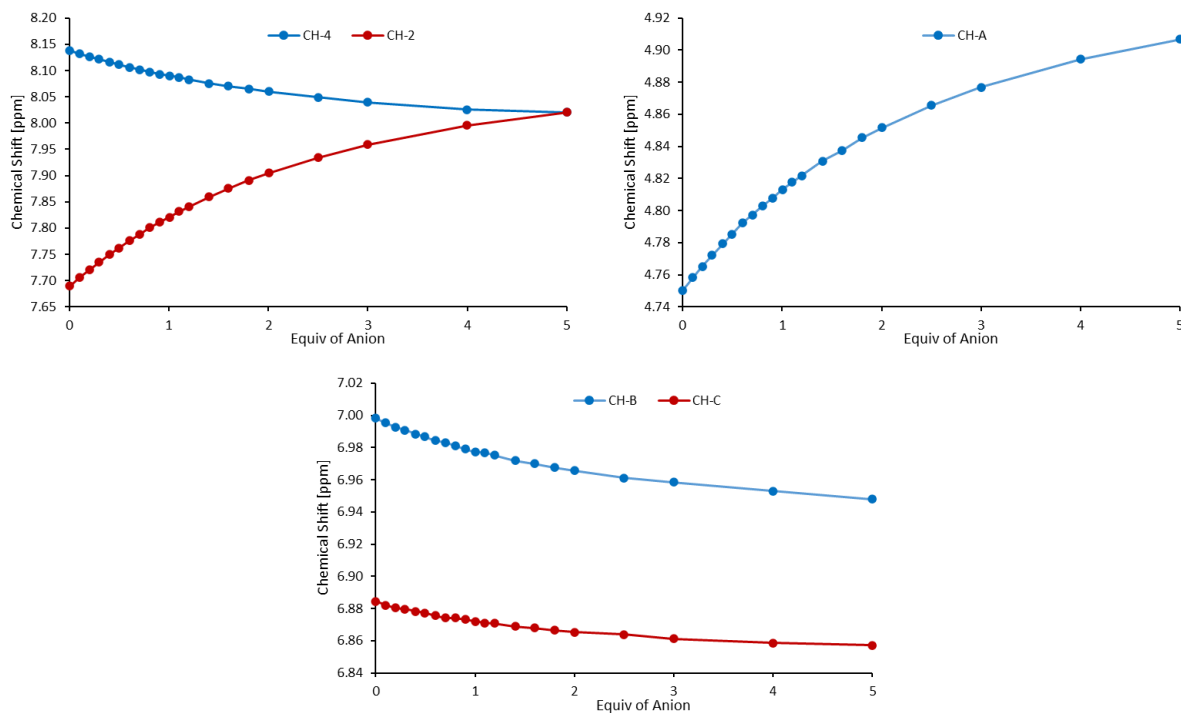

**Figure S38.** Binding isotherms obtained during titration of 0.0002 M solution of macrocycle **3** in DMSO- $d_6$ /D $_2$ O 9:1 with 0.03 M TBAPhCOO.

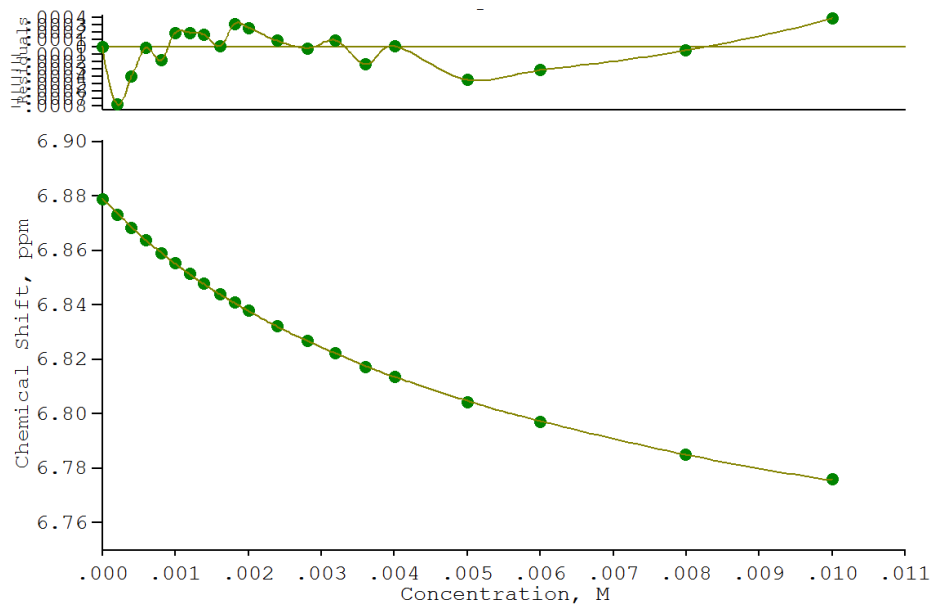

**Figure S39.** Fitting of 2:1 & 1:1 (receptor:anion) model to results of titration of 0.0002 M solution of macrocycle **3** in DMSO- $d_6$ /D $_2$ O 9:1 with 0.03 M TBAPhCOO for CH-c protons using WinEQNMR.

Binding constants K derived from averaging the results from fitting of 2:1 & 1:1 (receptor:anion) model to titration results for CH-2, CH-a, CH-b and CH-c protons using WinEQNMR:

$$\log K_{1:1} = 2.45, \text{ Std Dev.} = 0.04$$

$$\log K_{2:1} = 3.48, \text{ Std Dev.} = 0.07$$

5.1.11  $^1\text{H}$  NMR titration of 0.002 M solution of precursor **1** in  $\text{DMSO-d}_6 + 0.5\%$   $\text{H}_2\text{O}$  with 0.03 M  $\text{TBA}_2\text{SO}_4$ .

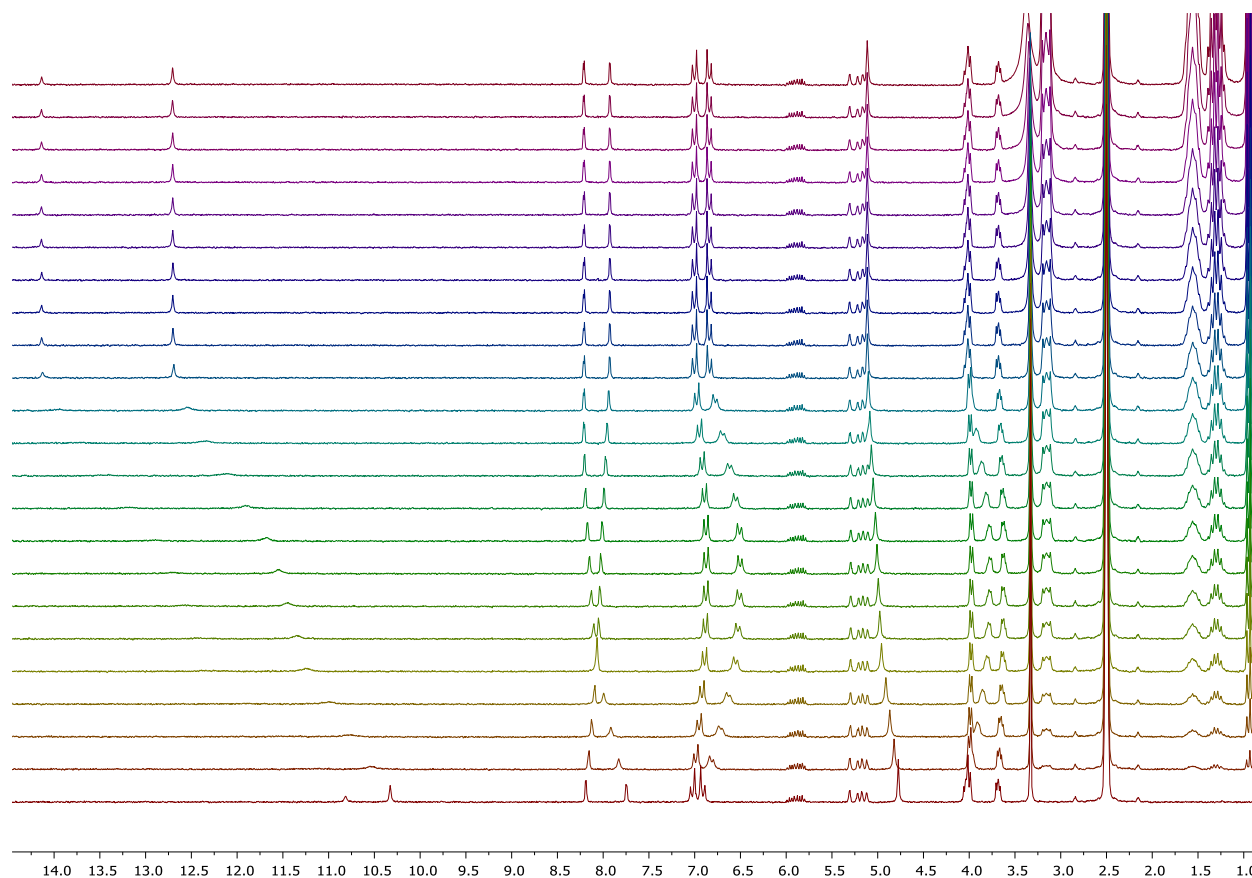

**Figure S40.** Stack of  $^1\text{H}$  NMR spectra obtained during titration of 0.002 M solution of precursor **1** in  $\text{DMSO-d}_6 + 0.5\%$   $\text{H}_2\text{O}$  with 0.03 M  $\text{TBA}_2\text{SO}_4$ .

**Table S10.** Chemical shifts of proton signals obtained during titration of 0.002 M solution of precursor **1** in  $\text{DMSO-d}_6 + 0.5\%$   $\text{H}_2\text{O}$  with 0.03 M  $\text{TBA}_2\text{SO}_4$ .

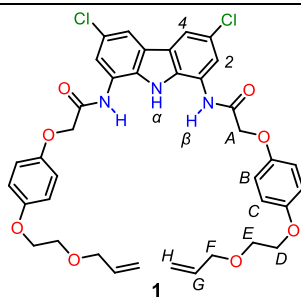

| Equiv. of $(\text{TBA})_2\text{SO}_4$ | $\alpha$ | $\beta$ | 2      | 4      | A      | B      | C      | D       | E      | F      | G      | H      |
|---------------------------------------|----------|---------|--------|--------|--------|--------|--------|---------|--------|--------|--------|--------|
| 0.00                                  | 10.8142  | 10.3269 | 7.7467 | 8.1895 | 4.7749 | 7.0234 | 6.9116 | 4.0369  | 3.6841 | 4.0015 | 5.8948 | 5.3066 |
| 0.10                                  | 11.1520  | 10.5309 | 7.8302 | 8.1568 | 4.8212 | 6.9864 | 6.8158 | overlap | 3.6695 | 3.9951 | 5.8922 | 5.3037 |
| 0.20                                  | 11.4305  | 10.7661 | 7.9158 | 8.1249 | 4.8683 | 6.9510 | 6.7184 | 3.9141  | 3.6546 | 3.9890 | 5.8892 | 5.3009 |
| 0.29                                  | broad    | 10.9948 | 7.9950 | 8.0944 | 4.9114 | 6.9203 | 6.6341 | 3.8574  | 3.6422 | 3.9837 | 5.8870 | 5.2987 |
| 0.40                                  | 12.2865  | 11.2411 | 8.0656 | 8.0656 | 4.9582 | 6.8918 | 6.5533 | 3.8110  | 3.6299 | 3.9788 | 5.8850 | 5.2968 |

|      |         |         |        |        |        |        |        |         |        |        |        |        |
|------|---------|---------|--------|--------|--------|--------|--------|---------|--------|--------|--------|--------|
| 0.45 | 12.3863 | 11.3479 | 8.1037 | 8.0481 | 4.9771 | 6.8831 | 6.5279 | 3.7921  | 3.6264 | 3.9774 | 5.8841 | 5.2961 |
| 0.50 | 12.5649 | 11.4479 | 8.1299 | 8.0348 | 4.9934 | 6.8775 | 6.5126 | 3.7850  | 3.6225 | 3.9765 | 5.8838 | 5.2959 |
| 0.54 | 12.6857 | 11.5487 | 8.1510 | 8.0246 | 5.0080 | 6.8747 | 6.5051 | 3.7820  | 3.6226 | 3.9761 | 5.8841 | 5.2954 |
| 0.60 | 12.8952 | 11.6808 | 8.1732 | 8.0098 | 5.0257 | 6.8770 | 6.5104 | 3.7857  | 3.6232 | 3.9767 | 5.8842 | 5.2956 |
| 0.70 | 13.1866 | 11.9086 | 8.1947 | 7.9893 | 5.0497 | 6.8933 | 6.5535 | 3.8220  | 3.6316 | 3.9801 | 5.8863 | 5.2977 |
| 0.80 | 13.4333 | 12.1090 | 8.2045 | 7.9716 | 5.0695 | 6.9178 | 6.6189 | 3.8683  | 3.6415 | 3.9850 | 5.8886 | 5.2997 |
| 0.90 | 13.7264 | 12.3412 | 8.2087 | 7.9553 | 5.0860 | 6.9467 | 6.6972 | 3.9314  | 3.6551 | 3.9905 | 5.8913 | 5.3026 |
| 1.00 | 13.9408 | 12.5429 | 8.2097 | 7.9393 | 5.1020 | 6.9773 | 6.7774 | overlap | 3.6690 | 3.9967 | 5.8951 | 5.3052 |
| 1.10 | 14.1258 | 12.6923 | 8.2091 | 7.9283 | 5.1132 | 7.0011 | 6.8391 | 4.0300  | 3.6790 | 4.0015 | 5.8968 | 5.3075 |
| 1.20 | 14.1351 | 12.7002 | 8.2091 | 7.9269 | 5.1140 | 7.0026 | 6.8420 | 4.0321  | 3.6791 | 4.0015 | 5.8973 | 5.3078 |
| 1.40 | 14.1368 | 12.7023 | 8.2091 | 7.9270 | 5.1139 | 7.0026 | 6.8421 | 4.0331  | 3.6797 | 4.0012 | 5.8972 | 5.3078 |
| 1.60 | 14.1356 | 12.7010 | 8.2090 | 7.9269 | 5.1133 | 7.0022 | 6.8420 | 4.0319  | 3.6795 | 4.0012 | 5.8967 | 5.3075 |
| 1.80 | 14.1386 | 12.7028 | 8.2095 | 7.9267 | 5.1145 | 7.0026 | 6.8425 | 4.0323  | 3.6811 | 4.0013 | 5.8965 | 5.3081 |
| 2.00 | 14.1384 | 12.7033 | 8.2095 | 7.9271 | 5.1141 | 7.0025 | 6.8424 | 4.0327  | 3.6821 | 4.0012 | 5.8973 | 5.3076 |
| 2.50 | 14.1370 | 12.7038 | 8.2099 | 7.9269 | 5.1145 | 7.0026 | 6.8423 | 4.0317  | 3.6803 | 4.0012 | 5.8966 | 5.3071 |
| 3.13 | 14.1367 | 12.7045 | 8.2102 | 7.9270 | 5.1144 | 7.0022 | 6.8421 | 4.0331  | 3.6793 | 4.0009 | 5.8966 | 5.3072 |
| 4.00 | 14.1375 | 12.7061 | 8.2105 | 7.9269 | 5.1148 | 7.0023 | 6.8421 | 4.0317  | 3.6800 | 4.0010 | 5.8961 | 5.3068 |
| 5.00 | 14.1365 | 12.7050 | 8.2106 | 7.9267 | 5.1144 | 7.0019 | 6.8416 | 4.0321  | 3.6796 | 4.0006 | 5.8958 | 5.3065 |

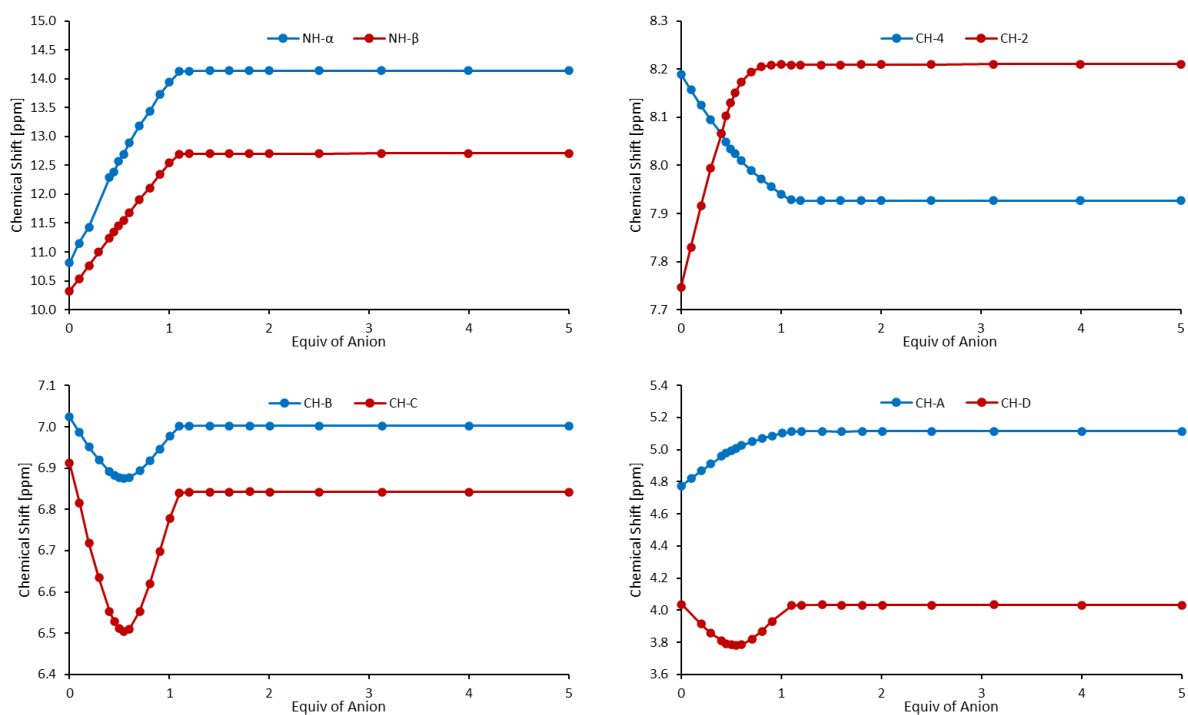

**Figure S41.** Binding isotherms obtained during titration of 0.002 M solution of precursor **1** in DMSO- $d_6$  + 0.5%  $H_2O$  with 0.03 M  $TBA_2SO_4$ .

**5.1.12**  $^1\text{H}$  NMR titration of 0.002 M solution of precursor **1** in  $\text{CDCl}_3$  with 0.03 M  $\text{TBA}_2\text{SO}_4$ .

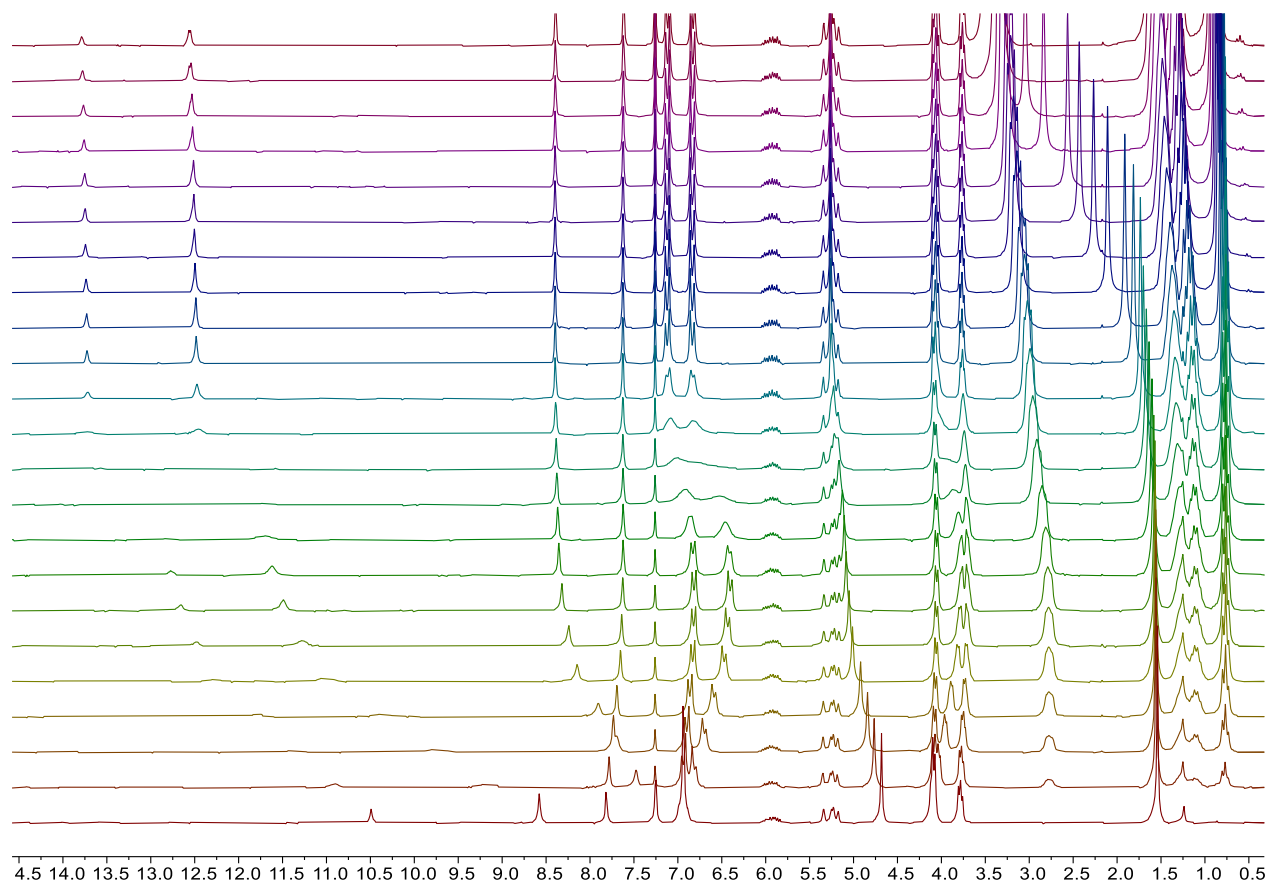

**Figure S42.** Stack of  $^1\text{H}$  NMR spectra obtained during titration of 0.002 M solution of precursor **1** in  $\text{CDCl}_3$  with 0.03 M  $\text{TBA}_2\text{SO}_4$ .

**Table S11.** Chemical shifts of proton signals obtained during titration of 0.002 M solution of precursor **1** in  $\text{CDCl}_3$  with 0.03 M  $\text{TBA}_2\text{SO}_4$ .

| Equiv of $(\text{TBA})_2\text{SO}_4$ | $\alpha$ | $\beta$ | <b>2</b> | <b>4</b> | <b>A</b> | <b>B</b> | <b>C</b> | <b>D</b> | <b>E</b> | <b>F</b> | <b>G</b> | <b>H</b> |
|--------------------------------------|----------|---------|----------|----------|----------|----------|----------|----------|----------|----------|----------|----------|
| 0.00                                 | 10.4918  | 8.578   | 7.2485   | 7.8162   | 4.6818   | 6.9647   | 6.9153   | 4.0965   | 3.7867   | 4.0965   | 5.935    | 5.3414   |
| 0.10                                 | 10.9023  | 9.1543  | 7.4754   | 7.7819   | 4.7652   | 6.9355   | 6.8161   | 4.04     | 3.7751   | 4.04     | 5.943    | 5.3511   |
| 0.20                                 | 11.3392  | 9.7588  | 7.6962   | 7.7349   | 4.8413   | 6.8967   | 6.7003   | 3.9609   | 3.7535   | 3.9609   | 5.9382   | 5.3466   |
| 0.29                                 | 11.7991  | 10.3588 | 7.9053   | 7.6928   | 4.9195   | 6.8626   | 6.5900   | 3.89     | 3.7305   | 3.89     | 5.9282   | 5.3424   |
| 0.40                                 | 12.2803  | 10.9989 | 8.1475   | 7.6515   | 5.0119   | 6.8306   | 6.4754   | 3.8159   | 3.7146   | 3.8159   | 5.9282   | 5.3394   |
| 0.45                                 | 12.4779  | 11.274  | 8.2414   | 7.6369   | 5.05     | 6.8198   | 6.4335   | 3.7894   | 3.7089   | 3.7894   | 5.9306   | 5.3378   |
| 0.50                                 | 12.658   | 11.4956 | 8.3214   | 7.6255   | 5.0845   | 6.8158   | 6.4058   | 3.7723   | 3.706    | 3.7723   | 5.9337   | 5.3372   |
| 0.54                                 | 12.7716  | 11.6179 | 8.3535   | 7.6216   | 5.1055   | 6.8275   | 6.4141   | 3.7777   | 3.7051   | 3.7777   | 5.9305   | 5.3363   |
| 0.60                                 | 12.8528  | 11.6922 | 8.3661   | 7.6209   | 5.1265   | 6.8589   | 6.4571   | 3.8061   | 3.7127   | 3.8061   | 5.926    | 5.3373   |
| 0.70                                 | broad    | broad   | 8.3759   | 7.6216   | 5.1657   | 6.9144   | 6.5230   | 3.8649   | 3.7262   | 3.8649   | 5.9324   | 5.3402   |
| 0.80                                 | 13.6615  | 12.4104 | 8.3837   | 7.6240   | 5.1996   | 6.9922   | 6.7846   | 3.9714   | 3.738    | 3.9714   | 5.9449   | 5.3432   |



|      |         |         |        |        |        |        |        |        |        |        |        |        |
|------|---------|---------|--------|--------|--------|--------|--------|--------|--------|--------|--------|--------|
| 0.90 | 13.7158 | 12.4558 | 8.3897 | 7.6247 | 5.2287 | 7.0829 | 6.8200 | 4.0407 | 3.7509 | 4.0407 | 5.9403 | 5.3450 |
| 1.00 | 13.7174 | 12.4759 | 8.3951 | 7.6258 | 5.256  | 7.1132 | 6.8315 | 4.0581 | 3.7624 | 4.0581 | 5.9383 | 5.3470 |
| 1.10 | 13.7257 | 12.4828 | 8.3967 | 7.6256 | 5.2604 | 7.1202 | 6.8370 | 4.072  | 3.7663 | 4.072  | 5.9339 | 5.3474 |
| 1.20 | 13.7288 | 12.4873 | 8.3967 | 7.6256 | 5.2621 | 7.1209 | 6.8375 | 4.0721 | 3.7671 | 4.0721 | 5.9387 | 5.3474 |
| 1.40 | 13.7368 | 12.4978 | 8.3969 | 7.6253 | 5.2632 | 7.1214 | 6.8373 | 4.0721 | 3.7677 | 4.0721 | 5.9315 | 5.3472 |
| 1.60 | 13.7444 | 12.504  | 8.3971 | 7.6248 | 5.2634 | 7.1214 | 6.8369 | 4.072  | 3.7652 | 4.072  | 5.9345 | 5.3470 |
| 1.80 | 13.7492 | 12.5084 | 8.3966 | 7.6244 | 5.2637 | 7.1211 | 6.8364 | 4.0715 | 3.7663 | 4.0715 | 5.9431 | 5.3466 |
| 2.00 | 13.7518 | 12.5141 | 8.3961 | 7.6236 | 5.2636 | 7.1206 | 6.8356 | 4.0712 | 3.7641 | 4.0712 | 5.9331 | 5.3463 |
| 2.50 | 13.7584 | 12.5237 | 8.3956 | 7.6225 | 5.2635 | 7.1198 | 6.8342 | 4.0703 | 3.7635 | 4.0703 | 5.9313 | 5.3453 |
| 3.13 | 13.7661 | 12.5319 | 8.3946 | 7.6214 | 5.2633 | 7.1191 | 6.8332 | 4.0696 | 3.7631 | 4.0696 | 5.9357 | 5.3446 |
| 4.00 | 13.7793 | 12.542  | 8.3931 | 7.6192 | 5.263  | 7.1173 | 6.8309 | 4.0679 | 3.7626 | 4.0679 | 5.9342 | 5.3427 |
| 5.00 | 13.784  | 12.5565 | 8.3910 | 7.6165 | 5.2619 | 7.1151 | 6.8283 | 4.0656 | 3.7598 | 4.0656 | 5.9348 | 5.3404 |

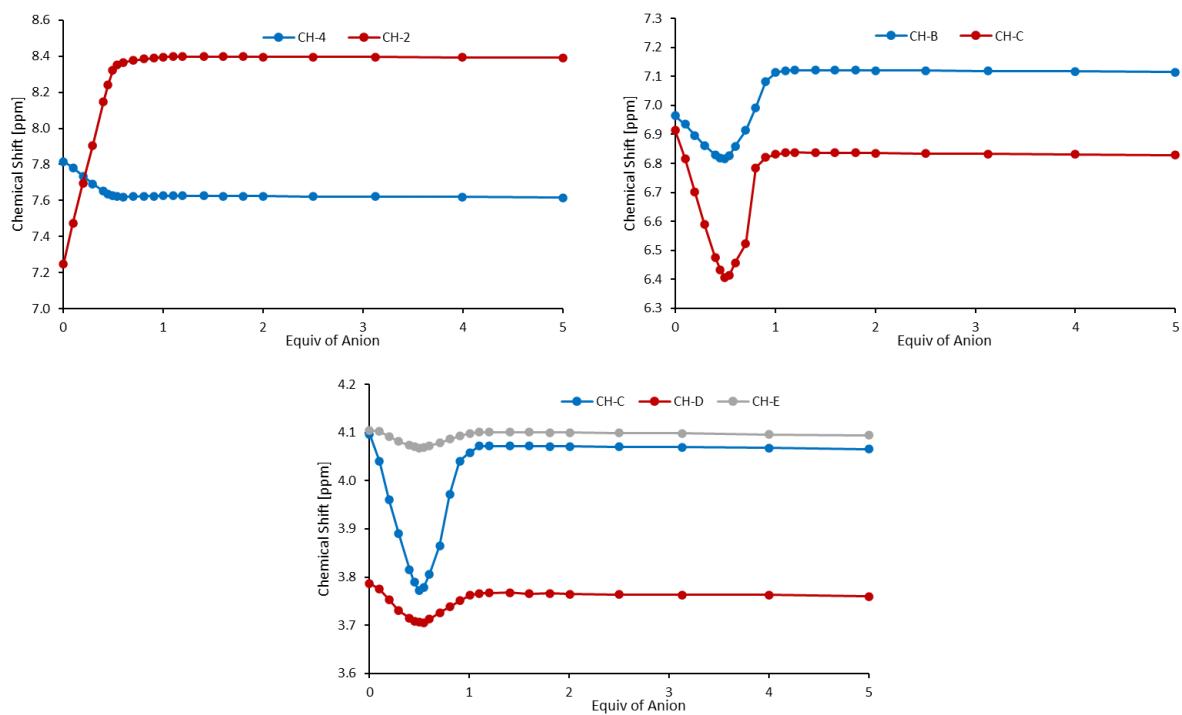

**Figure S43.** Binding isotherms obtained during titration of 0.002 M solution of precursor **1** in  $\text{CDCl}_3$  with 0.03 M  $\text{TBA}_2\text{SO}_4$ .

**5.1.13**  $^1\text{H}$  NMR titration of 0.0002 M solution of precursor **1** in DMSO- $d_6$ /D $_2$ O 9:1 with 0.003 M TBA $_2$ SO $_4$ .

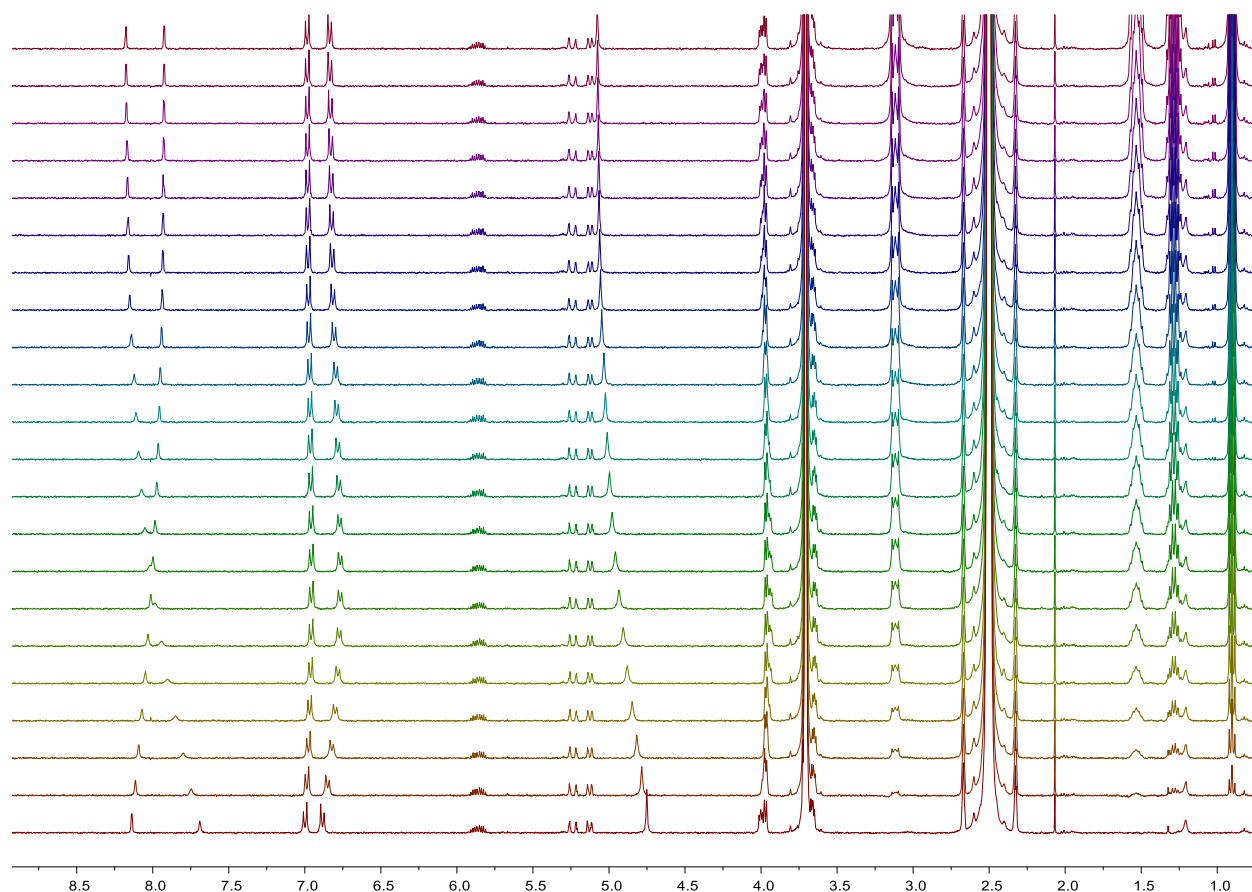

**Figure S44.** Stack of  $^1\text{H}$  NMR spectra obtained during titration of 0.0002 M solution of precursor **1** in DMSO- $d_6$ /D $_2$ O 9:1 with 0.003 M TBA $_2$ SO $_4$ .

**Table S12.** Chemical shifts of proton signals obtained during titration of 0.0002 M solution of precursor **1** in DMSO- $d_6$ /D $_2$ O 9:1 with 0.003 M TBA $_2$ SO $_4$ .

| Equiv of (TBA) $_2$ SO $_4$ | 2      | 4      | A      | B      | C      | D       | E      | F      | G      | H      |
|-----------------------------|--------|--------|--------|--------|--------|---------|--------|--------|--------|--------|
| 0.00                        | 7.6895 | 8.1376 | 4.7510 | 6.9980 | 6.8840 | 4.0016  | 3.6612 | 3.9777 | 5.8564 | 5.2379 |
| 0.10                        | 7.7459 | 8.1141 | 4.7839 | 6.9858 | 6.8504 | 3.9823  | 3.6546 | 3.9758 | 5.8579 | 5.2371 |
| 0.20                        | 7.8000 | 8.0923 | 4.8160 | 6.9759 | 6.8228 | overlap | 3.6506 | 3.9744 | 5.8564 | 5.2366 |
| 0.29                        | 7.8516 | 8.0704 | 4.8466 | 6.9680 | 6.8011 | overlap | 3.6475 | 3.9733 | 5.8581 | 5.2363 |
| 0.40                        | 7.9028 | 8.0483 | 4.8793 | 6.9617 | 6.7832 | 3.9457  | 3.6451 | 3.9724 | 5.8598 | 5.2362 |
| 0.45                        | 7.9427 | 8.0305 | 4.9059 | 6.9585 | 6.7739 | 3.9421  | 3.6439 | 3.9723 | 5.8570 | 5.2363 |
| 0.50                        | 7.9855 | 8.0121 | 4.9337 | 6.9569 | 6.7687 | 3.9407  | 3.6439 | 3.9724 | 5.8597 | 5.2367 |
| 0.54                        | 8.0166 | 7.9991 | 4.9575 | 6.9570 | 6.7683 | 3.9430  | 3.6443 | 3.9728 | 5.8582 | 5.2371 |
| 0.60                        | 8.0499 | 7.9850 | 4.9794 | 6.9586 | 6.7717 | 3.9474  | 3.6453 | 3.9734 | 5.8561 | 5.2376 |
| 0.70                        | 8.0739 | 7.9726 | 4.9962 | 6.9609 | 6.7772 | 3.9527  | 3.6468 | 3.9741 | 5.8606 | 5.2381 |
| 0.80                        | 8.0940 | 7.9640 | 5.0110 | 6.9635 | 6.7839 | overlap | 3.6482 | 3.9747 | 5.8637 | 5.2386 |
| 0.90                        | 8.1099 | 7.9563 | 5.0234 | 6.9662 | 6.7908 | overlap | 3.6498 | 3.9755 | 5.8598 | 5.2392 |

|      |        |        |        |        |        |         |        |        |        |        |
|------|--------|--------|--------|--------|--------|---------|--------|--------|--------|--------|
| 1.00 | 8.1213 | 7.9504 | 5.0326 | 6.9687 | 6.7969 | overlap | 3.6510 | 3.9761 | 5.8636 | 5.2396 |
| 1.10 | 8.1408 | 7.9413 | 5.0472 | 6.9731 | 6.8080 | overlap | 3.6534 | 3.9772 | 5.8576 | 5.2403 |
| 1.20 | 8.1510 | 7.9364 | 5.0555 | 6.9760 | 6.8154 | overlap | 3.6552 | 3.9780 | 5.8612 | 5.2407 |
| 1.40 | 8.1583 | 7.9330 | 5.0611 | 6.9780 | 6.8205 | 3.9881  | 3.6558 | 3.9784 | 5.8604 | 5.2411 |
| 1.60 | 8.1627 | 7.9308 | 5.0646 | 6.9793 | 6.8241 | 3.9908  | 3.6557 | 3.9788 | 5.8630 | 5.2413 |
| 1.80 | 8.1658 | 7.9292 | 5.0673 | 6.9804 | 6.8267 | 3.9934  | 3.6571 | 3.9790 | 5.8607 | 5.2414 |
| 2.00 | 8.1693 | 7.9280 | 5.0698 | 6.9815 | 6.8293 | 3.9945  | 3.6577 | 3.9792 | 5.8612 | 5.2415 |
| 2.50 | 8.1720 | 7.9261 | 5.0728 | 6.9826 | 6.8322 | 3.9969  | 3.6582 | 3.9793 | 5.8614 | 5.2417 |
| 3.13 | 8.1759 | 7.9246 | 5.0752 | 6.9837 | 6.8352 | 3.9997  | 3.6584 | 3.9797 | 5.8635 | 5.2418 |
| 4.00 | 8.1776 | 7.9241 | 5.0769 | 6.9842 | 6.8364 | 4.0002  | 3.6595 | 3.9798 | 5.8577 | 5.2420 |
| 5.00 | 7.6895 | 8.1376 | 4.7510 | 6.9980 | 6.8840 | 4.0016  | 3.6612 | 3.9777 | 5.8564 | 5.2379 |

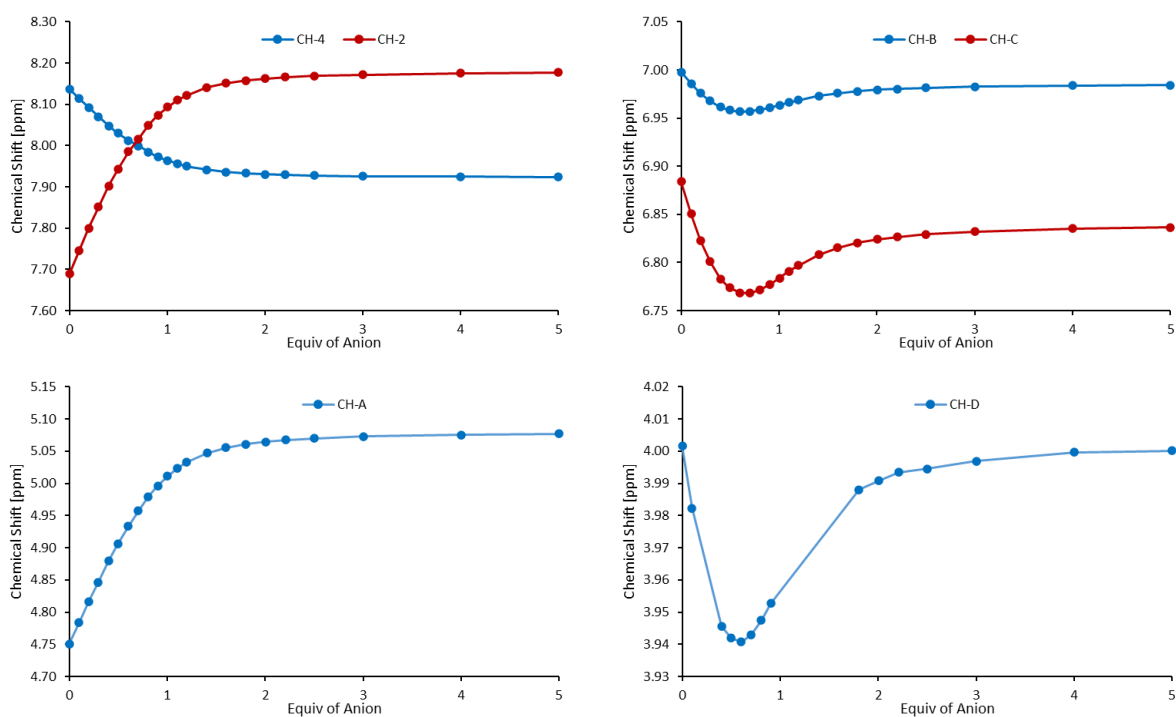

**Figure S45.** Binding isotherms obtained during titration of 0.0002 M solution of precursor **1** in DMSO- $d_6$ /D $_2$ O 9:1 with 0.003 M TBA $_2$ SO $_4$ .

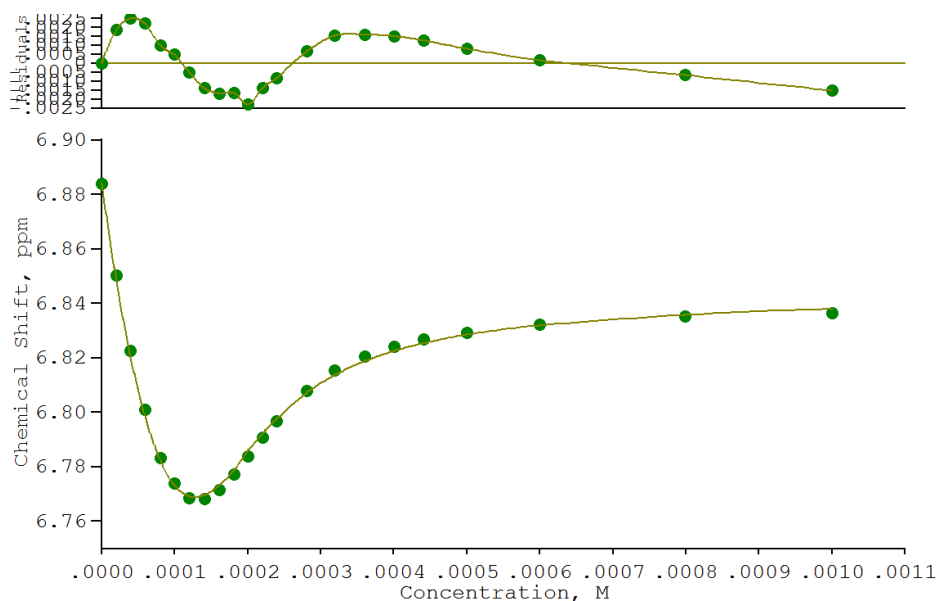

**Figure S46.** Fitting of 2:1 & 1:1 (receptor:anion) model to results of titration of 0.0002 M solution of precursor **1** in DMSO- $d_6$ /D $_2$ O 9:1 with 0.003 M TBA $_2$ SO $_4$  for CH-c protons using WinEQNMR.  $\log K_{1:1} = 4.87 \pm 0.01$ ,  $\log K_{2:1} = 3.21 \pm 0.11$ ;  $\delta(1:1) = 6.8441 \pm 0.0013$  ppm,  $\delta(2:1) = 6.1089 \pm 0.1464$  ppm

Binding constants K derived from averaging the results from fitting of 2:1 & 1:1 (receptor:anion) model to titration results for CH-2, CH-4, CH-b and CH-c protons using WinEQNMR:

$$\log K_{1:1} = 4.91, \text{ Std Dev.} = 0.02$$

$$\log K_{1:2} = 3.10, \text{ Std Dev.} = 0.08$$

**5.1.14**  $^1\text{H}$  NMR titration of 0.0002 M solution of precursor **1** in  $\text{DMSO-d}_6/\text{D}_2\text{O}$  9:1 with 0.003 M  $\text{TBAH}_2\text{PO}_4$ .

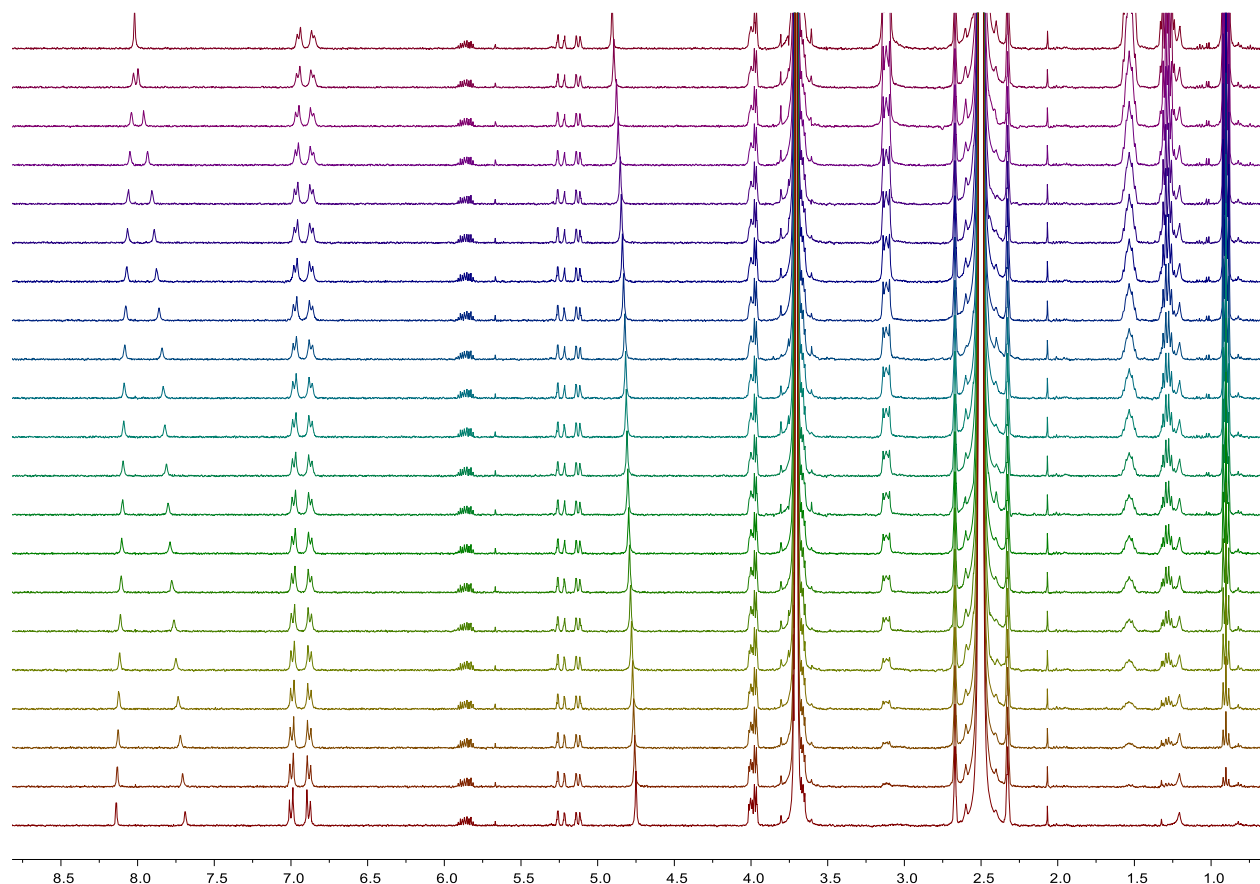

**Figure S47.** Stack of  $^1\text{H}$  NMR spectra obtained during titration of 0.0002 M solution of precursor **1** in  $\text{DMSO-d}_6/\text{D}_2\text{O}$  9:1 with 0.003 M  $\text{TBAH}_2\text{PO}_4$ .

**Table S13.** Chemical shifts of proton signals obtained during titration of 0.0002 M solution of precursor **1** in  $\text{DMSO-d}_6/\text{D}_2\text{O}$  9:1 with 0.003 M  $\text{TBA}_2\text{SO}_4$ .

| Equiv. of $\text{TBAHPO}_4$ | 2      | 4      | A      | B      | C      | D      | E      | F      | G      | H      |
|-----------------------------|--------|--------|--------|--------|--------|--------|--------|--------|--------|--------|
| 0.00                        | 7.6895 | 8.1388 | 4.7502 | 6.9984 | 6.8844 | 4.0023 | 3.6599 | 3.9712 | 5.8681 | 5.2381 |
| 0.10                        | 7.7059 | 8.1321 | 4.7583 | 6.9955 | 6.8822 | 4.0016 | 3.6595 | 3.9711 | 5.8561 | 5.2381 |
| 0.20                        | 7.7206 | 8.1267 | 4.7651 | 6.9929 | 6.8805 | 4.0010 | 3.6591 | 3.9711 | 5.8576 | 5.2381 |
| 0.29                        | 7.7349 | 8.1219 | 4.7720 | 6.9908 | 6.8797 | 4.0008 | 3.6595 | 3.9710 | 5.8574 | 5.2381 |
| 0.40                        | 7.7493 | 8.1166 | 4.7792 | 6.9886 | 6.8782 | 4.0002 | 3.6586 | 3.9710 | 5.8547 | 5.2382 |
| 0.50                        | 7.7618 | 8.1113 | 4.7853 | 6.9868 | 6.8772 | 4.0012 | 3.6586 | 3.9710 | 5.8676 | 5.2382 |
| 0.60                        | 7.776  | 8.1063 | 4.7922 | 6.9844 | 6.8756 | 4.0000 | 3.6586 | 3.9710 | 5.8573 | 5.2383 |
| 0.70                        | 7.7877 | 8.1020 | 4.7973 | 6.9831 | 6.8743 | 4.0006 | 3.6588 | 3.9710 | 5.8560 | 5.2383 |
| 0.80                        | 7.8009 | 8.0971 | 4.8031 | 6.9811 | 6.8742 | 4.0008 | 3.6587 | 3.9710 | 5.8548 | 5.2384 |
| 0.90                        | 7.8111 | 8.0931 | 4.8077 | 6.9791 | 6.8732 | 4.0009 | 3.6586 | 3.9709 | 5.8589 | 5.2383 |
| 1.00                        | 7.8206 | 8.0902 | 4.8131 | 6.9773 | 6.8719 | 3.9999 | 3.6588 | 3.9710 | 5.8584 | 5.2384 |
| 1.10                        | 7.8319 | 8.0871 | 4.8177 | 6.9770 | 6.8711 | 4.0009 | 3.6581 | 3.9710 | 5.8568 | 5.2385 |

|      |        |        |        |        |        |        |        |        |        |        |
|------|--------|--------|--------|--------|--------|--------|--------|--------|--------|--------|
| 1.20 | 7.8403 | 8.0824 | 4.8217 | 6.9753 | 6.8707 | 4.0002 | 3.6581 | 3.9710 | 5.8592 | 5.2384 |
| 1.40 | 7.8598 | 8.0757 | 4.8307 | 6.9720 | 6.8690 | 4.0009 | 3.6589 | 3.9709 | 5.8592 | 5.2386 |
| 1.60 | 7.8756 | 8.0704 | 4.8374 | 6.9701 | 6.8678 | 4.0000 | 3.6582 | 3.9709 | 5.8602 | 5.2386 |
| 1.80 | 7.8908 | 8.0650 | 4.8455 | 6.9676 | 6.8665 | 3.9987 | 3.6590 | 3.9709 | 5.8553 | 5.2386 |
| 2.00 | 7.9052 | 8.0602 | 4.8517 | 6.9656 | 6.8653 | 3.9999 | 3.6603 | 3.9709 | 5.8615 | 5.2387 |
| 2.50 | 7.9344 | 8.0488 | 4.8656 | 6.9610 | 6.8638 | 4.0000 | 3.6582 | 3.9709 | 5.8621 | 5.2388 |
| 3.00 | 7.9588 | 8.0397 | 4.8768 | 6.9586 | 6.8612 | 3.9995 | 3.6598 | 3.9710 | 5.8598 | 5.2388 |
| 4.00 | 7.9956 | 8.0259 | 4.8942 | 6.9530 | 6.8586 | 3.9994 | 3.6591 | 3.9711 | 5.8586 | 5.2390 |
| 5.00 | 8.0202 | 8.0202 | 4.9068 | 6.9480 | 6.8572 | 4.0001 | 3.6561 | 3.9712 | 5.8583 | 5.2391 |

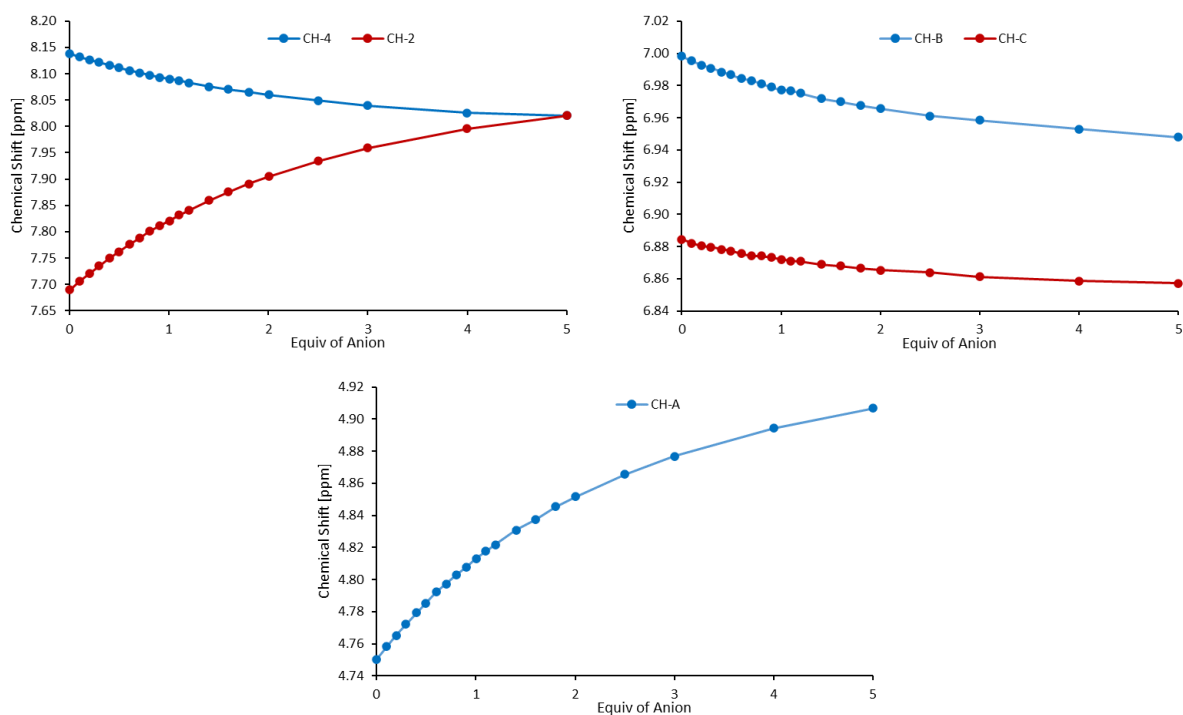

**Figure S48.** Binding isotherms obtained during titration of 0.0002 M solution of precursor **1** in DMSO- $d_6$ /D $_2$ O 9:1 with 0.003 M TBAH $_2$ PO $_4$ .

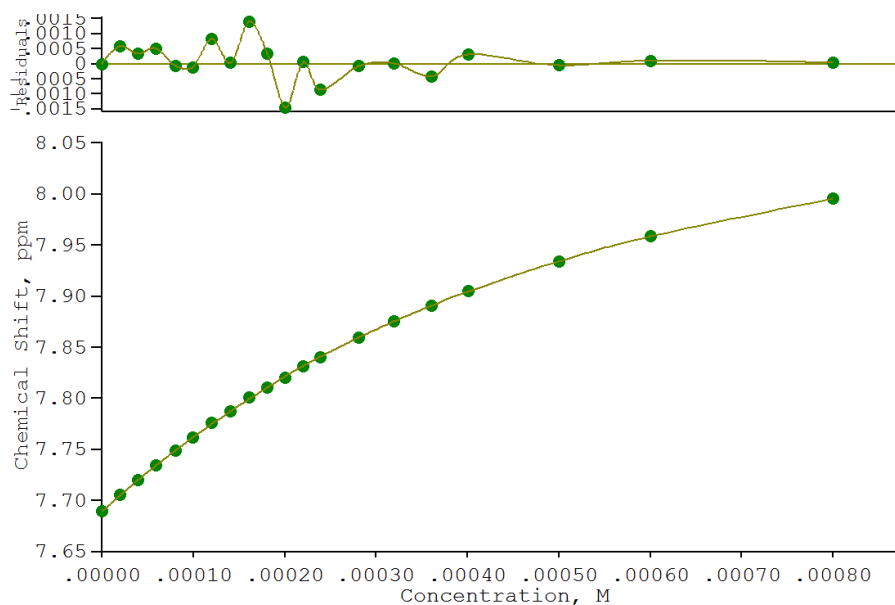

**Figure S49.** Fitting of 1:1 (receptor:anion) model to results of titration of 0.0002 M solution of precursor **1** in DMSO- $d_6$ /D $_2$ O 9:1 with 0.003 M TBAH $_2$ PO $_4$  for CH-2 protons using WinEQNMR.  $\log K_{1:1} = 3.41 \pm 0.01$ ;  $\delta(1:1) = 8.1697 \pm 0.0029$  ppm.

Binding constants  $K$  derived from averaging the results from fitting of 1:1 (receptor:anion) model to titration results for CH-2, CH-4, CH-a and CH-b protons using WinEQNMR:

$$\log K_{1:1} = 3.42, \text{ Std Dev.} = 0.04$$

## 5.2 UV-Vis Titrations

### General Procedure

All the reagents were weighted separately on a Mettler Toledo Excellence XA105DU analytical balance (readability 0.01 mg) in screw-capped vials sealed with Teflon-covered septa. DMSO/H<sub>2</sub>O mixtures were obtained using Milli-Q H<sub>2</sub>O and their concentrations were expressed as weight-weight percentage. All the solvent/solution manipulations were done using gas-tight Hamilton glass syringes. Titrants were prepared by dissolving appropriate salts in the solution of the receptor, in order to avoid dilution of the receptor during titration. Titrations were performed in a septum-sealed screw-cap precision cell made of Quartz SUPRASIL (light path: 10 mm, by adding aliquots of the titrant solution to the receptor solution (2.5 mL,  $1 \cdot 10^{-5}$  -  $1 \cdot 10^{-4}$  M) and recording UV-Vis spectra after each addition. UV spectra were obtained on Thermo Scientific Evolution 300 spectrometer at 25°C Association constants were calculated from absorbance changes at fixed wavelength. Nonlinear curve fit was carried out using the HypSpec software. Association constants and molar absorption coefficients of receptor and complexes were set as free parameters for fitting

**5.2.1** UV-Vis titration of  $10^{-4}$  M solution of catenane **A** in DMSO/H<sub>2</sub>O 9:1 with 0.00625 M solution of TBAH<sub>2</sub>PO<sub>4</sub> (dissolved in the solution of catenane **A**).

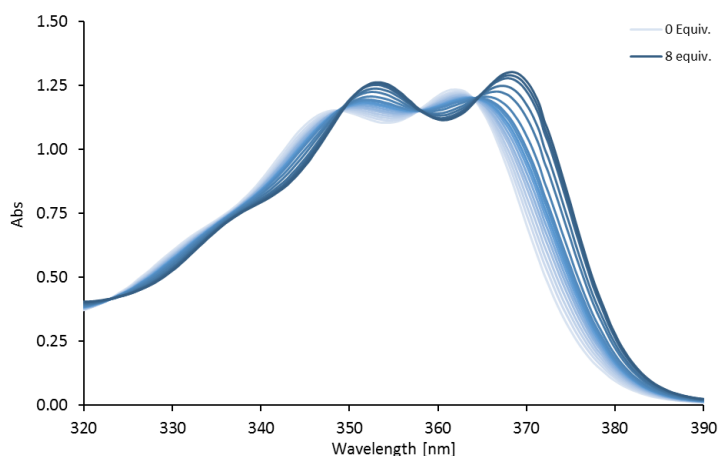

**Figure S50.** UV spectra obtained during titration of  $10^{-4}$  M solution of catenane **A** in DMSO/H<sub>2</sub>O 9:1 with 0.00625 M solution of TBAH<sub>2</sub>PO<sub>4</sub> (dissolved in the solution of receptor **A**).

**Table S14.** Absorbance values for selected wavelentghts recorded during titration of  $10^{-4}$  M solution of catenane **A** in DMSO/H<sub>2</sub>O 9:1 with 0.00625 M solution of TBAH<sub>2</sub>PO<sub>4</sub>.

| Added volume of titrant solution [μL] | Equivalents of TBAH <sub>2</sub> PO <sub>4</sub> | Wavelength [nm] |       |       |       |       |       |       |       |       |       |
|---------------------------------------|--------------------------------------------------|-----------------|-------|-------|-------|-------|-------|-------|-------|-------|-------|
|                                       |                                                  | 352             | 353   | 354   | 367   | 368   | 369   | 370   | 371   | 372   | 373   |
|                                       |                                                  | Absorbance      |       |       |       |       |       |       |       |       |       |
| 0.0                                   | 0.00                                             | 1.121           | 1.110 | 1.105 | 1.004 | 0.912 | 0.810 | 0.706 | 0.608 | 0.512 | 0.429 |
| 4.0                                   | 0.10                                             | 1.125           | 1.115 | 1.110 | 1.013 | 0.926 | 0.828 | 0.726 | 0.629 | 0.534 | 0.450 |
| 8.0                                   | 0.20                                             | 1.131           | 1.121 | 1.115 | 1.026 | 0.943 | 0.847 | 0.747 | 0.650 | 0.554 | 0.469 |
| 12.0                                  | 0.30                                             | 1.136           | 1.126 | 1.120 | 1.036 | 0.954 | 0.861 | 0.763 | 0.668 | 0.571 | 0.486 |
| 16.0                                  | 0.40                                             | 1.140           | 1.131 | 1.125 | 1.046 | 0.968 | 0.877 | 0.782 | 0.686 | 0.589 | 0.503 |



|       |      |       |       |       |       |       |       |       |       |       |       |
|-------|------|-------|-------|-------|-------|-------|-------|-------|-------|-------|-------|
| 20.0  | 0.50 | 1.145 | 1.137 | 1.129 | 1.055 | 0.981 | 0.893 | 0.799 | 0.705 | 0.608 | 0.521 |
| 24.0  | 0.59 | 1.149 | 1.140 | 1.134 | 1.065 | 0.993 | 0.908 | 0.816 | 0.723 | 0.625 | 0.537 |
| 28.5  | 0.70 | 1.154 | 1.146 | 1.139 | 1.075 | 1.007 | 0.924 | 0.834 | 0.742 | 0.643 | 0.555 |
| 32.5  | 0.80 | 1.158 | 1.150 | 1.143 | 1.085 | 1.020 | 0.939 | 0.851 | 0.759 | 0.661 | 0.572 |
| 36.5  | 0.90 | 1.161 | 1.154 | 1.146 | 1.093 | 1.030 | 0.953 | 0.866 | 0.776 | 0.677 | 0.588 |
| 40.5  | 1.00 | 1.163 | 1.157 | 1.150 | 1.099 | 1.039 | 0.964 | 0.879 | 0.790 | 0.692 | 0.603 |
| 45.0  | 1.11 | 1.167 | 1.161 | 1.154 | 1.108 | 1.050 | 0.978 | 0.895 | 0.807 | 0.709 | 0.619 |
| 49.0  | 1.20 | 1.171 | 1.166 | 1.158 | 1.117 | 1.061 | 0.992 | 0.910 | 0.823 | 0.723 | 0.632 |
| 53.0  | 1.30 | 1.175 | 1.170 | 1.163 | 1.123 | 1.070 | 1.002 | 0.922 | 0.835 | 0.736 | 0.644 |
| 57.5  | 1.41 | 1.179 | 1.174 | 1.167 | 1.132 | 1.082 | 1.016 | 0.939 | 0.853 | 0.753 | 0.661 |
| 61.5  | 1.50 | 1.181 | 1.177 | 1.169 | 1.138 | 1.090 | 1.026 | 0.950 | 0.865 | 0.766 | 0.674 |
| 65.5  | 1.60 | 1.184 | 1.180 | 1.172 | 1.143 | 1.098 | 1.036 | 0.960 | 0.875 | 0.777 | 0.684 |
| 70.0  | 1.70 | 1.188 | 1.184 | 1.176 | 1.152 | 1.109 | 1.049 | 0.975 | 0.892 | 0.793 | 0.699 |
| 74.0  | 1.80 | 1.191 | 1.188 | 1.180 | 1.157 | 1.116 | 1.057 | 0.985 | 0.902 | 0.803 | 0.709 |
| 78.5  | 1.90 | 1.194 | 1.191 | 1.183 | 1.164 | 1.125 | 1.070 | 0.998 | 0.916 | 0.817 | 0.723 |
| 82.5  | 2.00 | 1.195 | 1.192 | 1.184 | 1.167 | 1.129 | 1.075 | 1.005 | 0.924 | 0.824 | 0.731 |
| 91.0  | 2.20 | 1.200 | 1.198 | 1.190 | 1.176 | 1.142 | 1.091 | 1.024 | 0.943 | 0.844 | 0.749 |
| 104.0 | 2.50 | 1.207 | 1.206 | 1.199 | 1.191 | 1.163 | 1.117 | 1.054 | 0.976 | 0.876 | 0.780 |
| 126.0 | 3.00 | 1.216 | 1.217 | 1.210 | 1.211 | 1.191 | 1.152 | 1.094 | 1.020 | 0.919 | 0.823 |
| 148.5 | 3.50 | 1.224 | 1.225 | 1.217 | 1.226 | 1.212 | 1.178 | 1.125 | 1.053 | 0.953 | 0.857 |
| 171.0 | 4.00 | 1.230 | 1.232 | 1.225 | 1.240 | 1.231 | 1.203 | 1.153 | 1.084 | 0.984 | 0.887 |
| 194.0 | 4.50 | 1.234 | 1.239 | 1.232 | 1.249 | 1.245 | 1.222 | 1.176 | 1.110 | 1.009 | 0.913 |
| 217.0 | 4.99 | 1.238 | 1.244 | 1.237 | 1.257 | 1.258 | 1.238 | 1.196 | 1.133 | 1.032 | 0.935 |
| 267.0 | 6.03 | 1.247 | 1.253 | 1.246 | 1.272 | 1.279 | 1.265 | 1.228 | 1.167 | 1.068 | 0.971 |
| 317.0 | 7.03 | 1.250 | 1.258 | 1.252 | 1.280 | 1.291 | 1.282 | 1.248 | 1.190 | 1.090 | 0.993 |
| 367.0 | 8.00 | 1.252 | 1.263 | 1.259 | 1.287 | 1.302 | 1.298 | 1.268 | 1.212 | 1.114 | 1.018 |

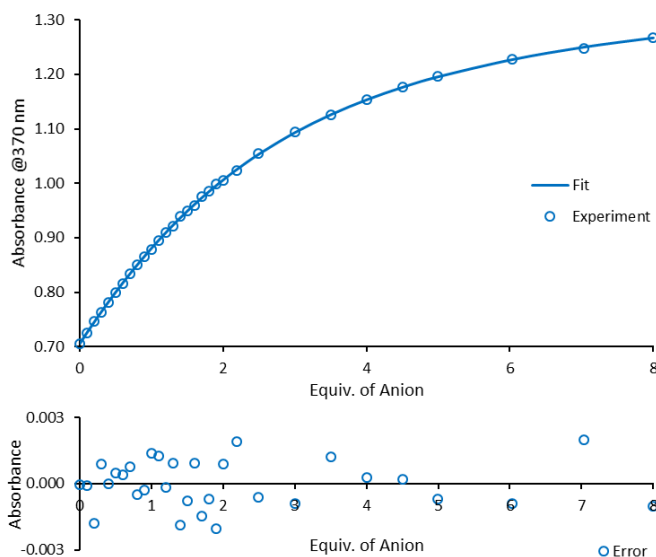

**Figure S51.** Fitting of 1:1 and 1:2 (receptor:anion) model to results of titration of  $10^{-4}$  M solution of catenane **A** in DMSO/H<sub>2</sub>O 9:1 with 0.00625 M solution of TBAH<sub>2</sub>PO<sub>4</sub>.

Binding constants  $K$  derived from simultaneous fitting of 1:1 and 1:2 model to ten selected wavelengths using HypSpec:

**log K<sub>1:1</sub> = 4.0326**, Std Dev. 0.0083  
**log K<sub>1:2</sub> = 3.4995**, Std Dev. Beta 0.0101

**Table S15.** Molar absorption coefficients derived from simultaneous fitting of 1:1 and 1:2 model to ten selected wavelengths using HypSpec.

|                                                                                      | Wavelength [nm] |       |       |       |       |       |       |       |       |       |
|--------------------------------------------------------------------------------------|-----------------|-------|-------|-------|-------|-------|-------|-------|-------|-------|
|                                                                                      | 352             | 353   | 354   | 367   | 368   | 369   | 370   | 371   | 372   | 373   |
| L [M <sup>-1</sup> cm <sup>-1</sup> ]                                                | 11203           | 11097 | 11047 | 10019 | 9110  | 8093  | 7057  | 6077  | 5122  | 4297  |
| L×H <sub>2</sub> PO <sub>4</sub> [M <sup>-1</sup> cm <sup>-1</sup> ]                 | 12316           | 12285 | 12157 | 12529 | 12340 | 11935 | 11312 | 10491 | 9445  | 8404  |
| L×(H <sub>2</sub> PO <sub>4</sub> ) <sub>2</sub> [M <sup>-1</sup> cm <sup>-1</sup> ] | 12766           | 12940 | 12926 | 13304 | 13720 | 13932 | 13851 | 13461 | 12492 | 11552 |

Binding constants K derived from two experiments repeated according to the same methodology:

**log K<sub>1:1</sub> = 3.8189**, Std Dev. 0.0179  
**log K<sub>1:2</sub> = 3.3998**, Std Dev. Beta 0.029

**log K<sub>1:1</sub> = 4.2769**, Std Dev. 0.0152  
**log K<sub>1:2</sub> = 3.6565**, Std Dev. Beta 0.0153

Binding constants averaged from the above three experiments:

**log K<sub>1:1</sub> = 4.043**, Std Dev. 0.187  
**log K<sub>1:2</sub> = 3.519**, Std Dev. 0.106

**5.2.2** UV-Vis titration of 10<sup>-4</sup> M solution of catenane **A** in DMSO/H<sub>2</sub>O 9:1 with 0.0625 M solution of TBAPhCOO (dissolved in the solution of catenane **A**).

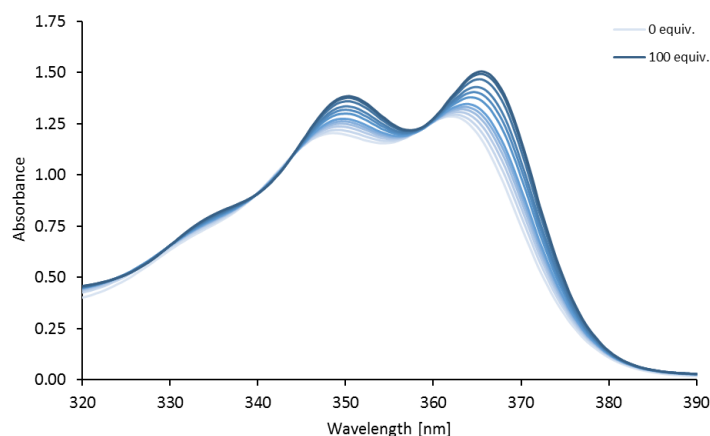

**Figure S52.** UV spectra obtained during titration of 10<sup>-4</sup> M solution of catenane **A** in DMSO/H<sub>2</sub>O 9:1 with 0.0625 M solution of TBAPhCOO (dissolved in the solution of catenane **A**).

**Table S16.** Absorbance values for selected wavelentghts recorded during titration of 10<sup>-4</sup> M solution of catenane **A** in DMSO/H<sub>2</sub>O 9:1 with 0.0625 M solution of TBAPhCOO.

| Added volume of titrant solution [μL] | Equivalents of TBAPhCOO | Wavelength [nm] |       |       |       |       |       |       |       |       |       |
|---------------------------------------|-------------------------|-----------------|-------|-------|-------|-------|-------|-------|-------|-------|-------|
|                                       |                         | 350             | 351   | 352   | 353   | 364   | 365   | 366   | 367   | 368   | 369   |
|                                       |                         | Absorbance      |       |       |       |       |       |       |       |       |       |
| 0                                     | 0.0                     | 1.197           | 1.186 | 1.172 | 1.162 | 1.251 | 1.204 | 1.138 | 1.054 | 0.961 | 0.856 |
| 8                                     | 2.0                     | 1.207           | 1.196 | 1.182 | 1.170 | 1.263 | 1.221 | 1.159 | 1.078 | 0.988 | 0.885 |
| 16                                    | 4.0                     | 1.216           | 1.206 | 1.192 | 1.179 | 1.274 | 1.236 | 1.178 | 1.101 | 1.012 | 0.909 |
| 24                                    | 5.9                     | 1.227           | 1.217 | 1.202 | 1.188 | 1.286 | 1.253 | 1.197 | 1.121 | 1.035 | 0.931 |
| 32.5                                  | 8.0                     | 1.235           | 1.225 | 1.210 | 1.195 | 1.297 | 1.266 | 1.214 | 1.141 | 1.055 | 0.952 |
| 40.5                                  | 10.0                    | 1.243           | 1.233 | 1.217 | 1.201 | 1.307 | 1.279 | 1.230 | 1.158 | 1.074 | 0.970 |
| 49                                    | 12.0                    | 1.250           | 1.241 | 1.225 | 1.208 | 1.316 | 1.292 | 1.246 | 1.176 | 1.092 | 0.988 |
| 57.5                                  | 14.1                    | 1.256           | 1.248 | 1.232 | 1.214 | 1.324 | 1.302 | 1.257 | 1.190 | 1.107 | 1.002 |
| 65.5                                  | 16.0                    | 1.262           | 1.253 | 1.237 | 1.218 | 1.331 | 1.312 | 1.270 | 1.205 | 1.123 | 1.020 |
| 74                                    | 18.0                    | 1.268           | 1.260 | 1.243 | 1.224 | 1.339 | 1.322 | 1.282 | 1.218 | 1.136 | 1.033 |
| 82.5                                  | 20.0                    | 1.274           | 1.266 | 1.250 | 1.230 | 1.347 | 1.332 | 1.294 | 1.231 | 1.151 | 1.048 |
| 104                                   | 25.0                    | 1.287           | 1.280 | 1.263 | 1.241 | 1.363 | 1.354 | 1.321 | 1.261 | 1.183 | 1.080 |
| 126                                   | 30.0                    | 1.300           | 1.294 | 1.275 | 1.252 | 1.379 | 1.374 | 1.344 | 1.288 | 1.211 | 1.107 |
| 148.5                                 | 35.0                    | 1.310           | 1.303 | 1.285 | 1.261 | 1.390 | 1.390 | 1.365 | 1.312 | 1.237 | 1.133 |
| 171                                   | 40.0                    | 1.319           | 1.312 | 1.293 | 1.269 | 1.400 | 1.403 | 1.380 | 1.329 | 1.254 | 1.151 |
| 194                                   | 45.0                    | 1.328           | 1.322 | 1.303 | 1.277 | 1.411 | 1.417 | 1.398 | 1.349 | 1.275 | 1.172 |
| 217                                   | 49.9                    | 1.336           | 1.330 | 1.310 | 1.284 | 1.420 | 1.430 | 1.413 | 1.366 | 1.292 | 1.189 |
| 265.5                                 | 60.0                    | 1.349           | 1.344 | 1.324 | 1.296 | 1.435 | 1.450 | 1.437 | 1.394 | 1.323 | 1.220 |
| 315.5                                 | 70.0                    | 1.360           | 1.355 | 1.335 | 1.307 | 1.448 | 1.467 | 1.458 | 1.418 | 1.348 | 1.245 |
| 367                                   | 80.0                    | 1.369           | 1.364 | 1.344 | 1.314 | 1.458 | 1.480 | 1.475 | 1.436 | 1.368 | 1.266 |
| 420.5                                 | 90.0                    | 1.376           | 1.372 | 1.351 | 1.321 | 1.467 | 1.491 | 1.488 | 1.452 | 1.385 | 1.282 |
| 476                                   | 100.0                   | 1.384           | 1.380 | 1.360 | 1.329 | 1.475 | 1.502 | 1.501 | 1.467 | 1.401 | 1.298 |

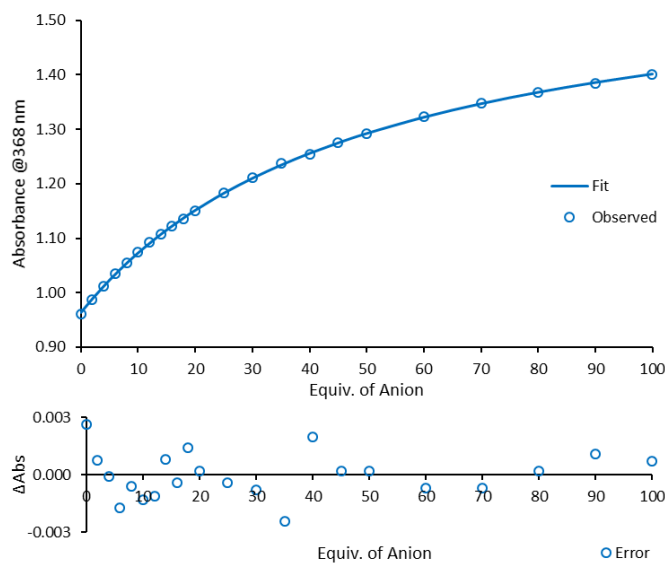

**Figure S53.** Fitting of 1:1 model to results of titration of  $10^{-4}$  M solution of catenane **A** in DMSO/H<sub>2</sub>O 9:1 with 0.0625 M solution of TBAPhCOO.

Binding constants K derived from simultaneous fitting of 1:1 model to ten selected wavelengths using HypSpec:

$$\log K_{1:1} = 2.3106, \text{ Std Dev. } 0.0004$$

**Table S17.** Molar absorption coefficients derived from simultaneous fitting of 1:1 model to ten selected wavelengths using HypSpec.

|                                      | Wavelength [nm] |       |       |       |       |       |       |       |       |       |
|--------------------------------------|-----------------|-------|-------|-------|-------|-------|-------|-------|-------|-------|
|                                      | 350             | 351   | 352   | 353   | 364   | 365   | 366   | 367   | 368   | 369   |
| L [ $M^{-1}cm^{-1}$ ]                | 11955           | 11844 | 11707 | 11597 | 12503 | 12042 | 11386 | 10549 | 9636  | 8597  |
| L $\times$ PhCOO [ $M^{-1}cm^{-1}$ ] | 14743           | 14738 | 14493 | 14079 | 15866 | 16505 | 16817 | 16715 | 16174 | 15153 |

Binding constants K derived from two experiments repeated according to the same methodology :

$$\log K_{1:1} = 2.4200, \text{ Std Dev. } 0.0009$$

$$\log K_{1:1} = 2.3862, \text{ Std Dev. } 0.0010$$

Binding constants averaged from the above three experiments:

$$\log K_{1:1} = 2.3723, \text{ Std Dev. } 0.0457$$

**5.2.3** UV-Vis titration of  $10^{-5}$  M solution of catenane **A** in DMSO/H<sub>2</sub>O 9:1 with 0.000625 M solution of TBA<sub>2</sub>SO<sub>4</sub> (dissolved in the solution of receptor **A**).

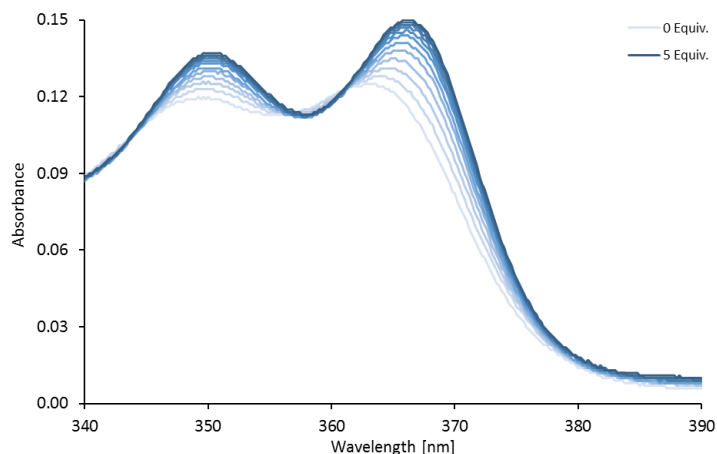

**Figure S54.** UV spectra obtained during titration of  $10^{-5}$  M solution of catenane **A** in DMSO/H<sub>2</sub>O 9:1 with 0.000625 M solution of TBA<sub>2</sub>SO<sub>4</sub>.

**Table S18.** Absorbance values for selected wavelentghts recorded during titration of  $10^{-5}$  M solution of catenane **A** in DMSO/H<sub>2</sub>O 9:1 with 0.000625 M solution of TBA<sub>2</sub>SO<sub>4</sub>.

| Added volume of titrant solution [ $\mu$ L] | Equivalents of TBA <sub>2</sub> SO <sub>4</sub> | Wavelength [nm] |       |       |       |       |       |       |       |       |       |
|---------------------------------------------|-------------------------------------------------|-----------------|-------|-------|-------|-------|-------|-------|-------|-------|-------|
|                                             |                                                 | 350             | 351   | 352   | 353   | 365   | 366   | 367   | 368   | 369   | 370   |
|                                             |                                                 | Absorbance      |       |       |       |       |       |       |       |       |       |
| 0                                           | 0.00                                            | 0.120           | 0.119 | 0.117 | 0.115 | 0.122 | 0.117 | 0.110 | 0.102 | 0.092 | 0.082 |
| 4                                           | 0.10                                            | 0.121           | 0.120 | 0.119 | 0.117 | 0.124 | 0.120 | 0.114 | 0.106 | 0.096 | 0.085 |
| 8                                           | 0.20                                            | 0.123           | 0.122 | 0.120 | 0.118 | 0.127 | 0.123 | 0.118 | 0.110 | 0.100 | 0.089 |
| 12                                          | 0.30                                            | 0.124           | 0.123 | 0.121 | 0.119 | 0.129 | 0.126 | 0.121 | 0.113 | 0.103 | 0.092 |
| 16                                          | 0.40                                            | 0.126           | 0.125 | 0.123 | 0.120 | 0.131 | 0.129 | 0.124 | 0.117 | 0.107 | 0.095 |
| 20                                          | 0.50                                            | 0.126           | 0.126 | 0.124 | 0.121 | 0.133 | 0.132 | 0.127 | 0.120 | 0.110 | 0.098 |
| 24                                          | 0.59                                            | 0.128           | 0.127 | 0.125 | 0.122 | 0.135 | 0.134 | 0.129 | 0.123 | 0.113 | 0.101 |
| 28.5                                        | 0.70                                            | 0.129           | 0.128 | 0.126 | 0.123 | 0.137 | 0.136 | 0.132 | 0.126 | 0.116 | 0.103 |
| 32.5                                        | 0.80                                            | 0.130           | 0.130 | 0.127 | 0.124 | 0.138 | 0.138 | 0.135 | 0.128 | 0.118 | 0.106 |
| 36.5                                        | 0.90                                            | 0.131           | 0.130 | 0.128 | 0.124 | 0.139 | 0.139 | 0.136 | 0.130 | 0.120 | 0.107 |
| 40.5                                        | 1.00                                            | 0.131           | 0.131 | 0.128 | 0.125 | 0.140 | 0.141 | 0.138 | 0.132 | 0.122 | 0.109 |
| 45                                          | 1.11                                            | 0.132           | 0.132 | 0.129 | 0.126 | 0.142 | 0.143 | 0.140 | 0.134 | 0.124 | 0.111 |
| 49                                          | 1.20                                            | 0.133           | 0.133 | 0.130 | 0.126 | 0.143 | 0.144 | 0.141 | 0.135 | 0.125 | 0.113 |
| 53                                          | 1.30                                            | 0.134           | 0.133 | 0.131 | 0.127 | 0.143 | 0.145 | 0.143 | 0.137 | 0.127 | 0.114 |
| 57.5                                        | 1.41                                            | 0.134           | 0.134 | 0.131 | 0.128 | 0.144 | 0.146 | 0.143 | 0.138 | 0.127 | 0.114 |
| 65.5                                        | 1.60                                            | 0.135           | 0.134 | 0.132 | 0.127 | 0.145 | 0.146 | 0.144 | 0.139 | 0.128 | 0.116 |
| 74                                          | 1.80                                            | 0.135           | 0.135 | 0.132 | 0.128 | 0.145 | 0.147 | 0.146 | 0.139 | 0.129 | 0.116 |
| 82.5                                        | 2.00                                            | 0.136           | 0.135 | 0.133 | 0.128 | 0.146 | 0.148 | 0.146 | 0.140 | 0.130 | 0.117 |
| 91                                          | 2.20                                            | 0.136           | 0.135 | 0.133 | 0.129 | 0.146 | 0.148 | 0.147 | 0.141 | 0.131 | 0.118 |
| 104                                         | 2.50                                            | 0.136           | 0.136 | 0.133 | 0.129 | 0.147 | 0.149 | 0.147 | 0.142 | 0.132 | 0.119 |
| 126                                         | 3.00                                            | 0.136           | 0.136 | 0.133 | 0.129 | 0.147 | 0.149 | 0.148 | 0.142 | 0.132 | 0.119 |

|     |      |       |       |       |       |       |       |       |       |       |       |
|-----|------|-------|-------|-------|-------|-------|-------|-------|-------|-------|-------|
| 171 | 4.00 | 0.137 | 0.136 | 0.134 | 0.130 | 0.147 | 0.150 | 0.148 | 0.143 | 0.133 | 0.119 |
| 217 | 4.99 | 0.137 | 0.137 | 0.134 | 0.130 | 0.147 | 0.150 | 0.148 | 0.143 | 0.133 | 0.120 |

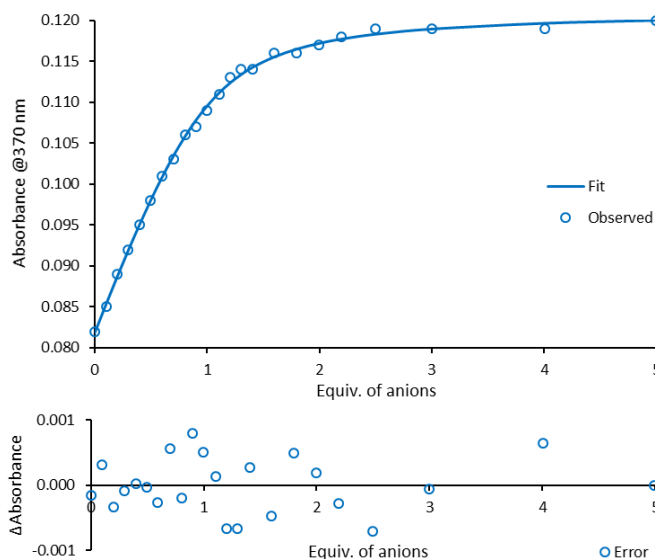

**Figure S55.** Fitting of 1:1 model to results of titration of  $10^{-5}$  M solution of catenane **A** in DMSO/H<sub>2</sub>O 9:1 with 0.000625 M solution of TBA<sub>2</sub>SO<sub>4</sub>

Binding constants K derived from simultaneous fitting of 1:1 model to ten selected wavelengths using HypSpec:

$$\log K_{1:1} = 5.9070, \text{ Std Dev. } 0.0022$$

**Table S19.** Molar absorption coefficients derived from simultaneous fitting of 1:1 model to ten selected wavelengths using HypSpec.

|                                                | Wavelength [nm] |       |       |       |       |       |       |       |       |       |
|------------------------------------------------|-----------------|-------|-------|-------|-------|-------|-------|-------|-------|-------|
|                                                | 350             | 351   | 352   | 353   | 365   | 366   | 367   | 368   | 369   | 370   |
| L [ $M^{-1}cm^{-1}$ ]                          | 11952           | 11852 | 11686 | 11510 | 12215 | 11730 | 11061 | 10244 | 9248  | 8185  |
| L $\times$ SO <sub>4</sub> [ $M^{-1}cm^{-1}$ ] | 13721           | 13689 | 13415 | 12985 | 14841 | 15132 | 14998 | 14471 | 13455 | 12118 |

Binding constants K derived from three experiments repeated according to the same methodology and different receptor concentrations:

$$\log K_{1:1} = 6.0432, \text{ Std Dev. } 0.0056, \text{ concentration: } 1e-5 \text{ M}$$

$$\log K_{1:1} = 5.8622, \text{ Std Dev. } 0.0025, \text{ concentration } 2.5e-5 \text{ M}$$

$$\log K_{1:1} = 5.9815, \text{ Std Dev. } 0.0045, \text{ concentration } 2.5e-5 \text{ M}$$

Binding constants averaged from the above four experiments:

$$\log K_{1:1} = 5.9485, \text{ Std Dev. } 0.0693$$

**5.2.4** UV-Vis titration of  $2 \cdot 10^{-4}$  M solution of macrocycle **3** in DMSO/H<sub>2</sub>O 9:1 with 0.025 M solution of TBAH<sub>2</sub>PO<sub>4</sub> (dissolved in the solution of receptor **3**).

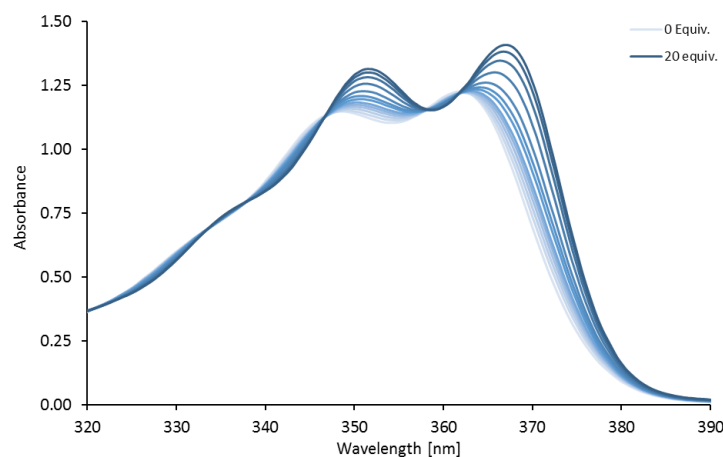

**Figure S56.** UV spectra obtained during titration of  $2 \cdot 10^{-4}$  M solution of macrocycle **3** in DMSO/H<sub>2</sub>O 9:1 with 0.025 M solution of TBAH<sub>2</sub>PO<sub>4</sub>.

**Table S20.** Absorbance values for selected wavelentghts recorded during titration of  $2 \cdot 10^{-4}$  M solution of macrocycle **3** in DMSO/H<sub>2</sub>O 9:1 with 0.025 M solution of TBAH<sub>2</sub>PO<sub>4</sub>.

| Added volume of titrant solution [μL] | Equivalents of TBAH <sub>2</sub> PO <sub>4</sub> | Wavelength [nm] |       |       |       |       |       |       |       |       |       |
|---------------------------------------|--------------------------------------------------|-----------------|-------|-------|-------|-------|-------|-------|-------|-------|-------|
|                                       |                                                  | 351             | 352   | 353   | 354   | 366   | 367   | 368   | 369   | 370   | 371   |
|                                       |                                                  | Absorbance      |       |       |       |       |       |       |       |       |       |
| 0                                     | 0                                                | 1.129           | 1.117 | 1.107 | 1.103 | 1.072 | 0.989 | 0.898 | 0.796 | 0.694 | 0.596 |
| 4                                     | 0.20                                             | 1.135           | 1.123 | 1.114 | 1.108 | 1.084 | 1.006 | 0.919 | 0.819 | 0.717 | 0.619 |
| 8                                     | 0.40                                             | 1.140           | 1.130 | 1.120 | 1.114 | 1.094 | 1.019 | 0.934 | 0.836 | 0.736 | 0.638 |
| 12                                    | 0.60                                             | 1.147           | 1.137 | 1.126 | 1.119 | 1.104 | 1.032 | 0.949 | 0.854 | 0.754 | 0.656 |
| 16                                    | 0.79                                             | 1.152           | 1.142 | 1.132 | 1.124 | 1.113 | 1.044 | 0.963 | 0.870 | 0.770 | 0.671 |
| 20                                    | 0.99                                             | 1.157           | 1.148 | 1.137 | 1.129 | 1.123 | 1.057 | 0.979 | 0.887 | 0.788 | 0.689 |
| 24                                    | 1.19                                             | 1.163           | 1.154 | 1.143 | 1.134 | 1.133 | 1.069 | 0.993 | 0.903 | 0.804 | 0.704 |
| 28.5                                  | 1.41                                             | 1.168           | 1.160 | 1.149 | 1.139 | 1.143 | 1.082 | 1.008 | 0.919 | 0.821 | 0.721 |
| 32.5                                  | 1.60                                             | 1.172           | 1.164 | 1.153 | 1.143 | 1.150 | 1.092 | 1.019 | 0.932 | 0.834 | 0.734 |
| 36.5                                  | 1.80                                             | 1.178           | 1.170 | 1.159 | 1.148 | 1.159 | 1.103 | 1.033 | 0.946 | 0.850 | 0.749 |
| 40.5                                  | 1.99                                             | 1.181           | 1.174 | 1.163 | 1.152 | 1.165 | 1.110 | 1.042 | 0.956 | 0.860 | 0.759 |
| 49                                    | 2.40                                             | 1.189           | 1.183 | 1.172 | 1.159 | 1.181 | 1.132 | 1.067 | 0.985 | 0.889 | 0.787 |
| 57.5                                  | 2.81                                             | 1.196           | 1.190 | 1.179 | 1.166 | 1.194 | 1.148 | 1.087 | 1.006 | 0.911 | 0.809 |
| 65.5                                  | 3.19                                             | 1.204           | 1.197 | 1.185 | 1.171 | 1.208 | 1.166 | 1.108 | 1.029 | 0.935 | 0.832 |
| 74                                    | 3.59                                             | 1.208           | 1.202 | 1.190 | 1.176 | 1.216 | 1.177 | 1.121 | 1.044 | 0.951 | 0.847 |
| 82.5                                  | 3.99                                             | 1.216           | 1.210 | 1.198 | 1.182 | 1.228 | 1.191 | 1.138 | 1.062 | 0.969 | 0.865 |
| 104                                   | 4.99                                             | 1.227           | 1.223 | 1.210 | 1.193 | 1.248 | 1.217 | 1.168 | 1.097 | 1.005 | 0.900 |
| 126                                   | 6.00                                             | 1.239           | 1.235 | 1.222 | 1.203 | 1.269 | 1.245 | 1.201 | 1.132 | 1.042 | 0.936 |
| 171                                   | 8.00                                             | 1.256           | 1.253 | 1.240 | 1.219 | 1.300 | 1.284 | 1.247 | 1.183 | 1.094 | 0.987 |
| 217.5                                 | 10.00                                            | 1.269           | 1.267 | 1.254 | 1.231 | 1.323 | 1.315 | 1.283 | 1.224 | 1.136 | 1.030 |
| 267.5                                 | 12.08                                            | 1.280           | 1.280 | 1.267 | 1.243 | 1.345 | 1.342 | 1.316 | 1.259 | 1.172 | 1.064 |
| 317.5                                 | 14.09                                            | 1.290           | 1.291 | 1.277 | 1.252 | 1.361 | 1.364 | 1.341 | 1.287 | 1.202 | 1.093 |
| 367.5                                 | 16.02                                            | 1.298           | 1.299 | 1.284 | 1.259 | 1.375 | 1.381 | 1.362 | 1.310 | 1.227 | 1.117 |

|       |       |       |       |       |       |       |       |       |       |       |       |
|-------|-------|-------|-------|-------|-------|-------|-------|-------|-------|-------|-------|
| 467.5 | 19.69 | 1.311 | 1.313 | 1.299 | 1.272 | 1.396 | 1.408 | 1.394 | 1.346 | 1.263 | 1.153 |
|-------|-------|-------|-------|-------|-------|-------|-------|-------|-------|-------|-------|

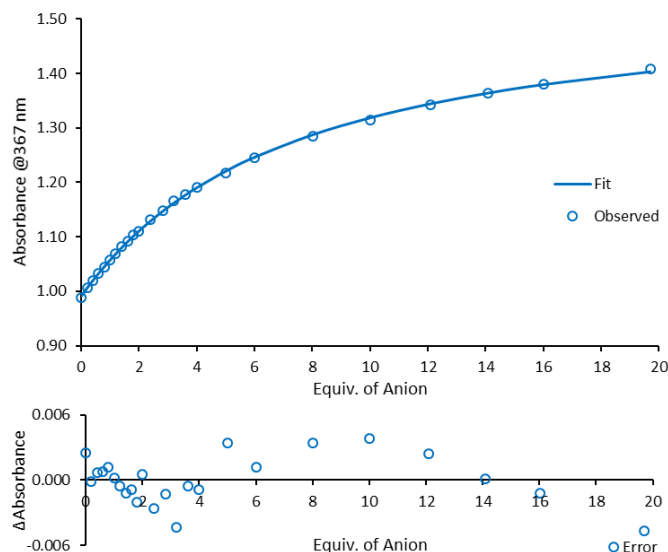

**Figure S57.** Fitting of 1:1 model to results of titration of  $2 \cdot 10^{-4}$  M solution of macrocycle **3** in DMSO/H<sub>2</sub>O 9:1 with 0.025 M solution of TBAH<sub>2</sub>PO<sub>4</sub>.

Binding constants K derived from simultaneous fitting of 1:1 model to ten selected wavelengths using HypSpec:

$$\log K_{1:1} \mathbf{2.8878}, \text{ Std Dev. } 0.0007$$

**Table S21.** Molar absorption coefficients derived from simultaneous fitting of 1:1 model to ten selected wavelengths using HypSpec.

|                                                      | Wavelength [nm] |      |      |      |      |      |      |      |      |      |
|------------------------------------------------------|-----------------|------|------|------|------|------|------|------|------|------|
|                                                      | 351             | 352  | 353  | 354  | 366  | 367  | 368  | 369  | 370  | 371  |
| L [ $M^{-1}cm^{-1}$ ]                                | 5645            | 5587 | 5538 | 5514 | 5364 | 4958 | 4507 | 4004 | 3494 | 3006 |
| L×H <sub>2</sub> PO <sub>4</sub> [ $M^{-1}cm^{-1}$ ] | 6843            | 6873 | 6793 | 6619 | 7506 | 7720 | 7773 | 7618 | 7234 | 6661 |

Binding constants K derived from an experiment repeated according to the same methodology:

$$\log K_{1:1} = \mathbf{2.8651}, \text{ Std Dev. } 0.0005$$

Binding constants averaged from the above two experiments:

$$\log K_{1:1} = \mathbf{2.87645}, \text{ Std Dev. } --$$



**5.2.5** UV-Vis titration of  $2 \cdot 10^{-4}$  M solution of macrocycle **3** in DMSO/H<sub>2</sub>O 9:1 with 0.125 M solution of TBAPhCOO (dissolved in the solution of receptor **3**).

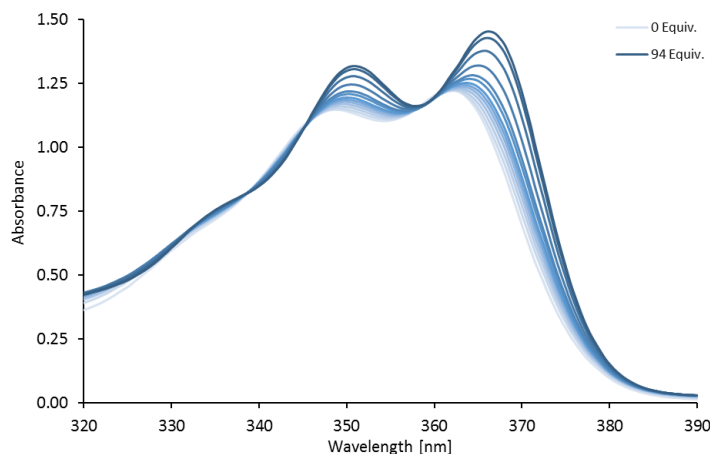

**Figure S58.** UV spectra obtained during titration of  $2 \cdot 10^{-4}$  M solution of macrocycle **3** in DMSO/H<sub>2</sub>O 9:1 with 0.125 M solution of TBAPhCOO.

**Table S22.** Absorbance values for selected wavelentghts recorder during titration of  $2 \cdot 10^{-4}$  M solution of macrocycle **3** in DMSO/H<sub>2</sub>O 9:1 with 0.125 M solution of TBAPhCOO.

| Added volume of titrant solution [μL] | Equivalents of TBAPhCOO | Wavelength [nm] |       |       |       |       |       |       |       |       |       |
|---------------------------------------|-------------------------|-----------------|-------|-------|-------|-------|-------|-------|-------|-------|-------|
|                                       |                         | 316             | 317   | 318   | 319   | 320   | 321   | 366   | 367   | 368   | 369   |
|                                       |                         | Absorbance      |       |       |       |       |       |       |       |       |       |
| 0                                     | 0.00                    | 0.340           | 0.341 | 0.345 | 0.353 | 0.364 | 0.377 | 1.071 | 0.989 | 0.900 | 0.799 |
| 4                                     | 1.00                    | 0.363           | 0.362 | 0.365 | 0.373 | 0.383 | 0.395 | 1.083 | 1.005 | 0.918 | 0.819 |
| 8                                     | 1.99                    | 0.374           | 0.372 | 0.376 | 0.383 | 0.392 | 0.404 | 1.094 | 1.019 | 0.935 | 0.837 |
| 12                                    | 2.99                    | 0.382           | 0.380 | 0.383 | 0.390 | 0.399 | 0.411 | 1.108 | 1.036 | 0.953 | 0.857 |
| 16                                    | 3.97                    | 0.389           | 0.387 | 0.389 | 0.396 | 0.405 | 0.416 | 1.119 | 1.049 | 0.968 | 0.873 |
| 20                                    | 4.96                    | 0.393           | 0.391 | 0.393 | 0.400 | 0.408 | 0.420 | 1.132 | 1.064 | 0.985 | 0.889 |
| 24                                    | 5.94                    | 0.395           | 0.393 | 0.395 | 0.402 | 0.410 | 0.421 | 1.143 | 1.078 | 1.000 | 0.905 |
| 28.5                                  | 7.04                    | 0.400           | 0.397 | 0.399 | 0.406 | 0.414 | 0.425 | 1.155 | 1.090 | 1.015 | 0.921 |
| 32.5                                  | 8.02                    | 0.403           | 0.400 | 0.402 | 0.408 | 0.417 | 0.428 | 1.165 | 1.103 | 1.028 | 0.936 |
| 36.5                                  | 8.99                    | 0.406           | 0.402 | 0.404 | 0.411 | 0.419 | 0.430 | 1.174 | 1.114 | 1.039 | 0.947 |
| 40.5                                  | 9.96                    | 0.407           | 0.404 | 0.406 | 0.412 | 0.420 | 0.431 | 1.183 | 1.125 | 1.052 | 0.960 |
| 45                                    | 11.05                   | 0.409           | 0.406 | 0.408 | 0.414 | 0.422 | 0.432 | 1.194 | 1.138 | 1.066 | 0.975 |
| 49                                    | 12.01                   | 0.410           | 0.407 | 0.409 | 0.414 | 0.422 | 0.433 | 1.202 | 1.147 | 1.076 | 0.985 |
| 57.5                                  | 14.05                   | 0.412           | 0.409 | 0.411 | 0.416 | 0.424 | 0.435 | 1.219 | 1.167 | 1.098 | 1.008 |
| 65.5                                  | 15.96                   | 0.415           | 0.411 | 0.413 | 0.419 | 0.426 | 0.437 | 1.232 | 1.183 | 1.116 | 1.027 |
| 74                                    | 17.97                   | 0.418           | 0.413 | 0.415 | 0.420 | 0.428 | 0.438 | 1.246 | 1.199 | 1.133 | 1.045 |
| 82.5                                  | 19.97                   | 0.418           | 0.414 | 0.415 | 0.421 | 0.428 | 0.438 | 1.256 | 1.211 | 1.146 | 1.059 |
| 104                                   | 24.96                   | 0.421           | 0.416 | 0.417 | 0.422 | 0.430 | 0.440 | 1.284 | 1.245 | 1.184 | 1.098 |
| 126                                   | 29.99                   | 0.422           | 0.417 | 0.418 | 0.424 | 0.431 | 0.441 | 1.310 | 1.275 | 1.217 | 1.132 |
| 171                                   | 40.01                   | 0.423           | 0.417 | 0.418 | 0.423 | 0.430 | 0.440 | 1.348 | 1.320 | 1.266 | 1.183 |
| 217.5                                 | 50.02                   | 0.426           | 0.419 | 0.419 | 0.424 | 0.431 | 0.440 | 1.377 | 1.354 | 1.304 | 1.222 |

|       |       |       |       |       |       |       |       |       |       |       |       |
|-------|-------|-------|-------|-------|-------|-------|-------|-------|-------|-------|-------|
| 267.5 | 60.41 | 0.425 | 0.418 | 0.418 | 0.422 | 0.429 | 0.438 | 1.401 | 1.382 | 1.336 | 1.255 |
| 342.5 | 75.31 | 0.424 | 0.416 | 0.416 | 0.420 | 0.426 | 0.435 | 1.428 | 1.415 | 1.371 | 1.291 |
| 442.5 | 93.99 | 0.424 | 0.416 | 0.415 | 0.418 | 0.424 | 0.433 | 1.453 | 1.444 | 1.403 | 1.325 |

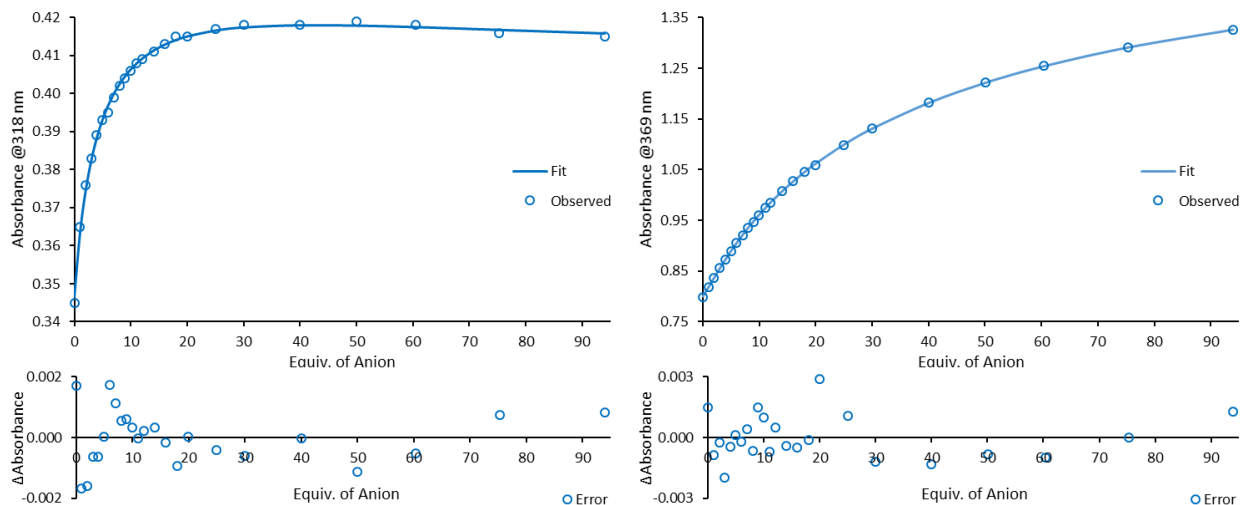

**Figure S59.** Fitting of 1:1 & 2:1 model to results of titration of  $2 \cdot 10^{-4}$  M solution of macrocycle **3** in DMSO/H<sub>2</sub>O 9:1 with 0.125 M solution of TBAPhCOO.

Binding constants  $K$  derived from simultaneous fitting of 1:1 & 2:1 (receptor:anion) model to ten selected wavelengths using HypSpec:

$$\log K_{1:1} = 2.5210, \text{ Std Dev. } 0.0015$$

$$\log K_{2:1} = 3.5842, \text{ Std Dev. Beta } 0.005$$

**Table S23.** Molar absorption coefficients derived from simultaneous fitting of 1:1 model to ten selected wavelengths using HypSpec.

|                                           | Wavelength [nm] |      |      |      |      |      |      |      |      |      |
|-------------------------------------------|-----------------|------|------|------|------|------|------|------|------|------|
|                                           | 316             | 317  | 318  | 319  | 320  | 321  | 366  | 367  | 368  | 369  |
| L [ $M^{-1}cm^{-1}$ ]                     | 1716            | 1715 | 1734 | 1773 | 1826 | 1889 | 5355 | 4949 | 4507 | 4003 |
| L <sub>x</sub> PhCOO [ $M^{-1}cm^{-1}$ ]  | 2086            | 2032 | 2023 | 2035 | 2065 | 2104 | 8177 | 8293 | 8192 | 7839 |
| L <sub>2</sub> xPhCOO [ $M^{-1}cm^{-1}$ ] | 5331            | 5336 | 5372 | 5449 | 5503 | 5612 | 8099 | 6901 | 5785 | 4777 |

Binding constants  $K$  derived from an experiment repeated according to the same methodology:

$$\log K_{1:1} = 2.4568, \text{ Std Dev. } 0.0024$$

$$\log K_{2:1} = 3.7229, \text{ Std Dev. Beta } 0.0065$$

Binding constants averaged from the above two experiments:

$$\log K_{1:1} = 2.4889, \text{ Std Dev. } -$$

$$\log K_{2:1} = 3.6536, \text{ Std Dev. } -$$

**5.2.6** UV-Vis titration of  $2 \cdot 10^{-4}$  M solution of macrocycle **3** in DMSO/H<sub>2</sub>O 9:1 with 0.0125 M solution of TBA<sub>2</sub>SO<sub>4</sub> (dissolved in the solution of receptor **3**).

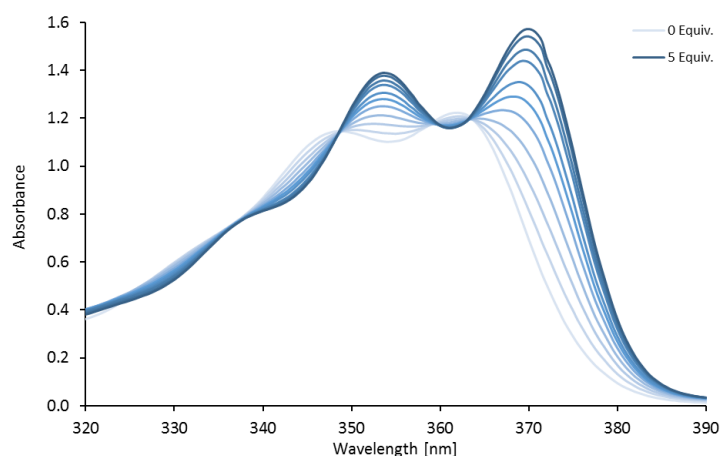

**Figure S60.** UV spectra obtained during titration of  $2 \cdot 10^{-4}$  M solution of macrocycle **3** in DMSO/H<sub>2</sub>O 9:1 with 0.0125 M solution of TBA<sub>2</sub>SO<sub>4</sub>.

**Table S24.** Absorbance values for selected wavelentghts recorded during titration of  $2 \cdot 10^{-4}$  M solution of macrocycle **3** in DMSO/H<sub>2</sub>O 9:1 with 0.125 M solution of TBAPhCOO.

| Added volume of titrant solution [μL] | Equivalents of TBA <sub>2</sub> SO <sub>4</sub> | Wavelength [nm] |       |       |       |       |       |       |       |       |       |
|---------------------------------------|-------------------------------------------------|-----------------|-------|-------|-------|-------|-------|-------|-------|-------|-------|
|                                       |                                                 | 319             | 320   | 321   | 322   | 323   | 324   | 325   | 326   | 357   | 358   |
|                                       |                                                 | Absorbance      |       |       |       |       |       |       |       |       |       |
| 0                                     | 0.00                                            | 0.351           | 0.362 | 0.375 | 0.390 | 0.409 | 0.431 | 0.453 | 0.479 | 1.131 | 1.154 |
| 4                                     | 0.10                                            | 0.367           | 0.377 | 0.389 | 0.404 | 0.422 | 0.442 | 0.463 | 0.489 | 1.136 | 1.154 |
| 8                                     | 0.20                                            | 0.377           | 0.386 | 0.399 | 0.413 | 0.430 | 0.449 | 0.469 | 0.493 | 1.147 | 1.159 |
| 12                                    | 0.30                                            | 0.384           | 0.393 | 0.405 | 0.419 | 0.435 | 0.454 | 0.472 | 0.495 | 1.155 | 1.163 |
| 16                                    | 0.40                                            | 0.388           | 0.397 | 0.409 | 0.422 | 0.438 | 0.456 | 0.474 | 0.495 | 1.165 | 1.168 |
| 20                                    | 0.50                                            | 0.392           | 0.400 | 0.411 | 0.425 | 0.440 | 0.457 | 0.474 | 0.495 | 1.175 | 1.173 |
| 24                                    | 0.59                                            | 0.394           | 0.402 | 0.414 | 0.427 | 0.442 | 0.458 | 0.474 | 0.494 | 1.185 | 1.179 |
| 28.5                                  | 0.70                                            | 0.394           | 0.403 | 0.414 | 0.427 | 0.441 | 0.457 | 0.472 | 0.491 | 1.197 | 1.185 |
| 32.5                                  | 0.80                                            | 0.395           | 0.403 | 0.414 | 0.427 | 0.441 | 0.456 | 0.471 | 0.488 | 1.206 | 1.191 |
| 36.5                                  | 0.90                                            | 0.395           | 0.403 | 0.414 | 0.427 | 0.440 | 0.455 | 0.469 | 0.486 | 1.215 | 1.196 |
| 40.5                                  | 1.00                                            | 0.394           | 0.402 | 0.413 | 0.425 | 0.439 | 0.453 | 0.467 | 0.483 | 1.223 | 1.201 |
| 45                                    | 1.11                                            | 0.392           | 0.400 | 0.411 | 0.424 | 0.437 | 0.451 | 0.464 | 0.480 | 1.232 | 1.206 |
| 49                                    | 1.20                                            | 0.391           | 0.399 | 0.410 | 0.422 | 0.435 | 0.449 | 0.462 | 0.477 | 1.239 | 1.210 |
| 57.5                                  | 1.41                                            | 0.389           | 0.397 | 0.408 | 0.420 | 0.433 | 0.446 | 0.459 | 0.473 | 1.250 | 1.217 |
| 65.5                                  | 1.60                                            | 0.389           | 0.398 | 0.408 | 0.420 | 0.433 | 0.446 | 0.458 | 0.472 | 1.258 | 1.221 |
| 74                                    | 1.80                                            | 0.387           | 0.395 | 0.406 | 0.417 | 0.430 | 0.443 | 0.455 | 0.468 | 1.264 | 1.225 |
| 82.5                                  | 2.00                                            | 0.386           | 0.394 | 0.405 | 0.417 | 0.429 | 0.442 | 0.453 | 0.467 | 1.269 | 1.229 |
| 104                                   | 2.50                                            | 0.381           | 0.389 | 0.400 | 0.412 | 0.425 | 0.437 | 0.448 | 0.461 | 1.276 | 1.233 |
| 126                                   | 3.00                                            | 0.379           | 0.387 | 0.398 | 0.410 | 0.422 | 0.434 | 0.445 | 0.458 | 1.282 | 1.237 |
| 171                                   | 4.00                                            | 0.376           | 0.384 | 0.395 | 0.407 | 0.419 | 0.431 | 0.442 | 0.455 | 1.286 | 1.240 |
| 217.5                                 | 5.00                                            | 0.373           | 0.381 | 0.392 | 0.404 | 0.416 | 0.428 | 0.439 | 0.452 | 1.290 | 1.243 |

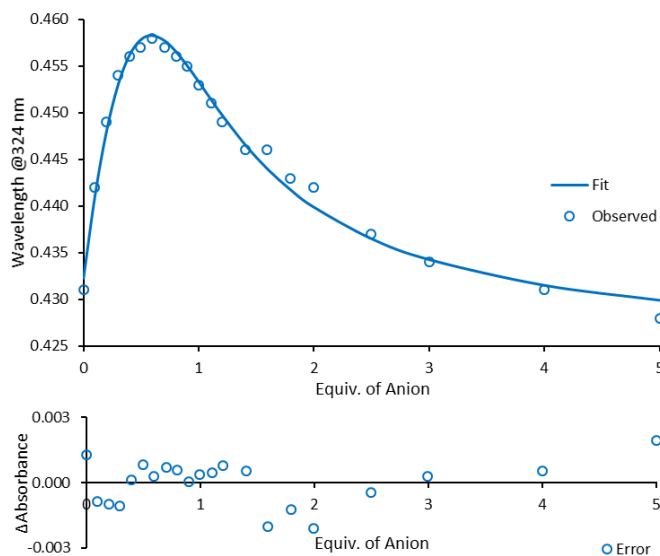

**Figure S61.** Fitting of 1:1 & 2:1 model to results of titration of  $2 \cdot 10^{-4}$  M solution of macrocycle **3** in DMSO/H<sub>2</sub>O 9:1 with 0.0125 M solution of TBA<sub>2</sub>SO<sub>4</sub>.

Binding constants K derived from simultaneous fitting of 1:1 & 2:1 (receptor:anion) model to ten selected wavelengths using HypSpec:

$$\log K_{1:1} = 4.5410, \text{ Std Dev. } 0.005$$

$$\log K_{2:1} = 3.4175, \text{ Std Dev. Beta } 0.0294$$

**Table S25.** Molar absorption coefficients derived from simultaneous fitting of 1:1 model to ten selected wavelengths using HypSpec.

|                                                                     | Wavelength [nm] |      |      |      |      |      |      |      |       |       |
|---------------------------------------------------------------------|-----------------|------|------|------|------|------|------|------|-------|-------|
|                                                                     | 319             | 320  | 321  | 322  | 323  | 324  | 325  | 326  | 357   | 358   |
| L [M <sup>-1</sup> cm <sup>-1</sup> ]                               | 1766            | 1819 | 1884 | 1959 | 2054 | 2161 | 2272 | 2406 | 5650  | 5765  |
| L×SO <sub>4</sub> [M <sup>-1</sup> cm <sup>-1</sup> ]               | 1849            | 1890 | 1945 | 2003 | 2063 | 2120 | 2171 | 2229 | 6530  | 6262  |
| L <sub>2</sub> ×SO <sub>4</sub> [M <sup>-1</sup> cm <sup>-1</sup> ] | 5518            | 5545 | 5626 | 5740 | 5839 | 5975 | 6110 | 6286 | 10682 | 10870 |

Binding constants K derived from an experiment repeated according to the same methodology:

$$\log K_{1:1} = 4.3964, \text{ Std Dev. } 0.0045$$

$$\log K_{2:1} = 3.2794, \text{ Std Dev. Beta } 0.0322$$

Binding constants averaged from the above two experiments:

$$\log K_{1:1} = 4.4687, \text{ Std Dev. } -$$

$$\log K_{2:1} = 3.3485, \text{ Std Dev. } -$$

**5.2.7** UV-Vis titration of  $2 \cdot 10^{-4}$  M solution of precursor **1** in DMSO/H<sub>2</sub>O 9:1 with 0.0125 M solution of TBAH<sub>2</sub>PO<sub>4</sub> (dissolved in the solution of receptor **1**).

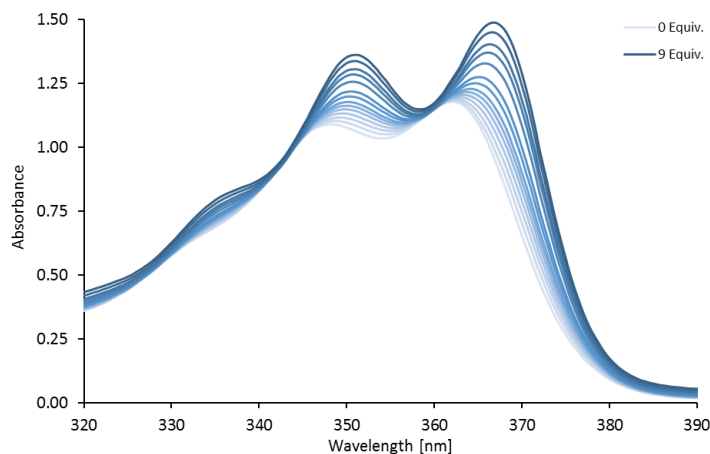

**Figure S62.** UV spectra obtained during titration of  $2 \cdot 10^{-4}$  M solution of precursor **1** in DMSO/H<sub>2</sub>O 9:1 with 0.0125 M solution of TBAH<sub>2</sub>PO<sub>4</sub>.

**Table S26.** Absorbance values for selected wavelentghts recorded during titration of  $2 \cdot 10^{-4}$  M solution of precursor **1** in DMSO/H<sub>2</sub>O 9:1 with 0.0125 M solution of TBAH<sub>2</sub>PO<sub>4</sub>.

| Added volume of titrant solution [μL] | Equivalents of TBAH <sub>2</sub> PO <sub>4</sub> | Wavelength [nm] |       |      |       |       |      |       |       |      |       |
|---------------------------------------|--------------------------------------------------|-----------------|-------|------|-------|-------|------|-------|-------|------|-------|
|                                       |                                                  | 350             |       |      | 350   |       |      | 350   |       |      | 350   |
|                                       |                                                  | Absorbance      |       |      |       |       |      |       |       |      |       |
| 0                                     | 0.00                                             | 1.076           | 0     | 0.00 | 1.076 | 0     | 0.00 | 1.076 | 0     | 0.00 | 1.076 |
| 4                                     | 0.10                                             | 1.086           | 4     | 0.10 | 1.086 | 4     | 0.10 | 1.086 | 4     | 0.10 | 1.086 |
| 8                                     | 0.20                                             | 1.096           | 8     | 0.20 | 1.096 | 8     | 0.20 | 1.096 | 8     | 0.20 | 1.096 |
| 12                                    | 0.30                                             | 1.105           | 12    | 0.30 | 1.105 | 12    | 0.30 | 1.105 | 12    | 0.30 | 1.105 |
| 16                                    | 0.40                                             | 1.113           | 16    | 0.40 | 1.113 | 16    | 0.40 | 1.113 | 16    | 0.40 | 1.113 |
| 20                                    | 0.50                                             | 1.122           | 20    | 0.50 | 1.122 | 20    | 0.50 | 1.122 | 20    | 0.50 | 1.122 |
| 24                                    | 0.59                                             | 1.131           | 24    | 0.59 | 1.131 | 24    | 0.59 | 1.131 | 24    | 0.59 | 1.131 |
| 28.5                                  | 0.70                                             | 1.139           | 28.5  | 0.70 | 1.139 | 28.5  | 0.70 | 1.139 | 28.5  | 0.70 | 1.139 |
| 32.5                                  | 0.80                                             | 1.148           | 32.5  | 0.80 | 1.148 | 32.5  | 0.80 | 1.148 | 32.5  | 0.80 | 1.148 |
| 36.5                                  | 0.90                                             | 1.155           | 36.5  | 0.90 | 1.155 | 36.5  | 0.90 | 1.155 | 36.5  | 0.90 | 1.155 |
| 40.5                                  | 1.00                                             | 1.162           | 40.5  | 1.00 | 1.162 | 40.5  | 1.00 | 1.162 | 40.5  | 1.00 | 1.162 |
| 45                                    | 1.11                                             | 1.170           | 45    | 1.11 | 1.170 | 45    | 1.11 | 1.170 | 45    | 1.11 | 1.170 |
| 49                                    | 1.20                                             | 1.177           | 49    | 1.20 | 1.177 | 49    | 1.20 | 1.177 | 49    | 1.20 | 1.177 |
| 57.5                                  | 1.41                                             | 1.186           | 57.5  | 1.41 | 1.186 | 57.5  | 1.41 | 1.186 | 57.5  | 1.41 | 1.186 |
| 65.5                                  | 1.60                                             | 1.198           | 65.5  | 1.60 | 1.198 | 65.5  | 1.60 | 1.198 | 65.5  | 1.60 | 1.198 |
| 74                                    | 1.80                                             | 1.207           | 74    | 1.80 | 1.207 | 74    | 1.80 | 1.207 | 74    | 1.80 | 1.207 |
| 82.5                                  | 2.00                                             | 1.216           | 82.5  | 2.00 | 1.216 | 82.5  | 2.00 | 1.216 | 82.5  | 2.00 | 1.216 |
| 104                                   | 2.50                                             | 1.236           | 104   | 2.50 | 1.236 | 104   | 2.50 | 1.236 | 104   | 2.50 | 1.236 |
| 126                                   | 3.00                                             | 1.252           | 126   | 3.00 | 1.252 | 126   | 3.00 | 1.252 | 126   | 3.00 | 1.252 |
| 148.5                                 | 3.50                                             | 1.267           | 148.5 | 3.50 | 1.267 | 148.5 | 3.50 | 1.267 | 148.5 | 3.50 | 1.267 |
| 171                                   | 4.00                                             | 1.279           | 171   | 4.00 | 1.279 | 171   | 4.00 | 1.279 | 171   | 4.00 | 1.279 |

|       |      |       |       |      |       |       |      |       |       |      |       |
|-------|------|-------|-------|------|-------|-------|------|-------|-------|------|-------|
| 194   | 4.50 | 1.290 | 194   | 4.50 | 1.290 | 194   | 4.50 | 1.290 | 194   | 4.50 | 1.290 |
| 217   | 4.99 | 1.299 | 217   | 4.99 | 1.299 | 217   | 4.99 | 1.299 | 217   | 4.99 | 1.299 |
| 265.5 | 6.00 | 1.315 | 265.5 | 6.00 | 1.315 | 265.5 | 6.00 | 1.315 | 265.5 | 6.00 | 1.315 |
| 315.5 | 7.00 | 1.329 | 315.5 | 7.00 | 1.329 | 315.5 | 7.00 | 1.329 | 315.5 | 7.00 | 1.329 |
| 365.5 | 7.97 | 1.340 | 365.5 | 7.97 | 1.340 | 365.5 | 7.97 | 1.340 | 365.5 | 7.97 | 1.340 |
| 440.5 | 9.36 | 1.352 | 440.5 | 9.36 | 1.352 | 440.5 | 9.36 | 1.352 | 440.5 | 9.36 | 1.352 |

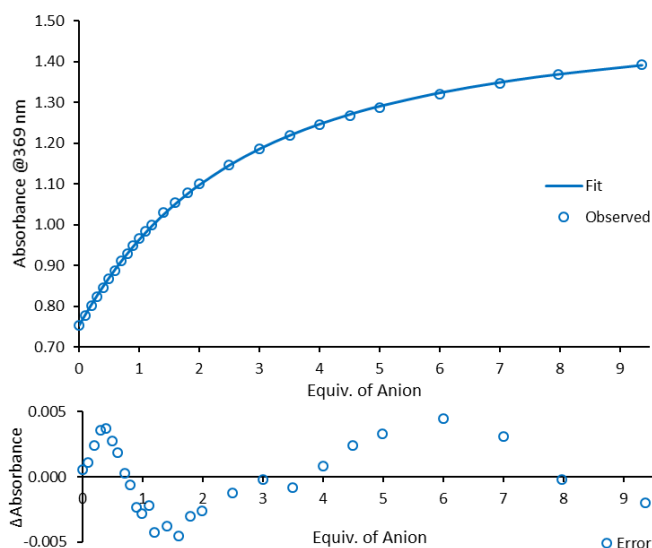

**Figure S63.** Fitting of 1:1 model to results of titration of  $2 \cdot 10^{-4}$  M solution of precursor **1** in DMSO/H<sub>2</sub>O 9:1 with 0.0125 M solution of TBAH<sub>2</sub>PO<sub>4</sub>.

Binding constants K derived from simultaneous fitting of 1:1 (receptor:anion) model to ten selected wavelengths using HypSpec:

$$\log K_{1:1} = 3.3953, \text{ Std Dev. } 0.0007$$

**Table S27.** Molar absorption coefficients derived from simultaneous fitting of 1:1 model to ten selected wavelengths using HypSpec.

|                                                                      | Wavelength [nm] |      |      |      |      |      |      |      |      |      |
|----------------------------------------------------------------------|-----------------|------|------|------|------|------|------|------|------|------|
|                                                                      | 350             | 351  | 352  | 353  | 365  | 366  | 367  | 368  | 369  | 370  |
| L [M <sup>-1</sup> cm <sup>-1</sup> ]                                | 5364            | 5303 | 5232 | 5178 | 5433 | 5105 | 4698 | 4257 | 3768 | 3273 |
| L×H <sub>2</sub> PO <sub>4</sub> [M <sup>-1</sup> cm <sup>-1</sup> ] | 7037            | 7111 | 7057 | 6887 | 7588 | 7906 | 8062 | 8005 | 7705 | 7172 |

Binding constants K derived from two experiments repeated according to the same methodology at different concentrations:

$$\log K_{1:1} = 3.4974 \text{ Std Dev. } 0.0003$$

$$\log K_{1:1} = 3.4464 \text{ Std Dev. } 0.0008, \text{ concentration: } 1e-4 \text{ M}$$

Binding constant averaged from the above three experiments:

$$\log K_{1:1} = 3.4464, \text{ Std Dev. } 0.0417$$

**5.2.8** UV-Vis titration of  $2 \cdot 10^{-4}$  M solution of precursor **1** in DMSO/H<sub>2</sub>O 9:1 with 0.0125 M solution of TBAPhCOO (dissolved in the solution of receptor **1**).

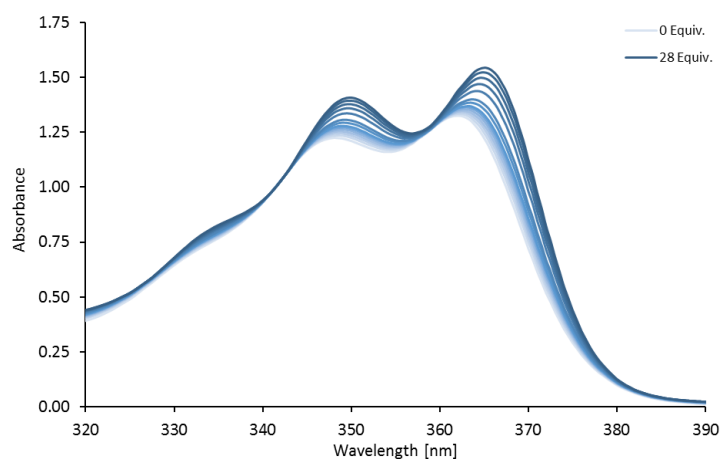

**Figure S64.** UV spectra obtained during titration of  $2 \cdot 10^{-4}$  M solution of precursor **1** in DMSO/H<sub>2</sub>O 9:1 with 0.0125 M solution of TBAPhCOO.

**Table S28.** Absorbance values for selected wavelentghts recorded during titration of  $2 \cdot 10^{-4}$  M solution of precursor **1** in DMSO/H<sub>2</sub>O 9:1 with 0.0125 M solution of TBAPhCOO.

| Added volume of titrant solution [μL] | Equivalents of TBAPhCOO | Wavelength [nm] |       |       |       |       |       |       |       |       |       |
|---------------------------------------|-------------------------|-----------------|-------|-------|-------|-------|-------|-------|-------|-------|-------|
|                                       |                         | 348             | 349   | 350   | 351   | 364   | 365   | 366   | 367   | 368   | 369   |
|                                       |                         | Absorbance      |       |       |       |       |       |       |       |       |       |
| 0                                     | 0.00                    | 1.225           | 1.222 | 1.211 | 1.195 | 1.281 | 1.224 | 1.145 | 1.049 | 0.945 | 0.834 |
| 4                                     | 0.40                    | 1.231           | 1.229 | 1.219 | 1.203 | 1.291 | 1.237 | 1.161 | 1.067 | 0.964 | 0.853 |
| 8                                     | 0.80                    | 1.235           | 1.235 | 1.225 | 1.210 | 1.298 | 1.247 | 1.173 | 1.081 | 0.978 | 0.867 |
| 12                                    | 1.19                    | 1.240           | 1.239 | 1.231 | 1.215 | 1.306 | 1.257 | 1.184 | 1.093 | 0.992 | 0.880 |
| 16                                    | 1.59                    | 1.244           | 1.245 | 1.236 | 1.221 | 1.313 | 1.267 | 1.196 | 1.106 | 1.005 | 0.893 |
| 20                                    | 1.98                    | 1.248           | 1.250 | 1.241 | 1.227 | 1.320 | 1.276 | 1.208 | 1.119 | 1.018 | 0.905 |
| 24                                    | 2.38                    | 1.252           | 1.254 | 1.246 | 1.232 | 1.326 | 1.283 | 1.216 | 1.129 | 1.027 | 0.916 |
| 28.5                                  | 2.82                    | 1.256           | 1.260 | 1.253 | 1.238 | 1.333 | 1.293 | 1.227 | 1.141 | 1.041 | 0.929 |
| 32.5                                  | 3.21                    | 1.259           | 1.264 | 1.257 | 1.242 | 1.339 | 1.301 | 1.238 | 1.152 | 1.053 | 0.941 |
| 36.5                                  | 3.60                    | 1.264           | 1.268 | 1.262 | 1.248 | 1.346 | 1.309 | 1.248 | 1.164 | 1.064 | 0.951 |
| 40.5                                  | 3.99                    | 1.267           | 1.272 | 1.266 | 1.252 | 1.352 | 1.317 | 1.256 | 1.173 | 1.074 | 0.961 |
| 45                                    | 4.42                    | 1.270           | 1.277 | 1.271 | 1.257 | 1.357 | 1.324 | 1.265 | 1.183 | 1.085 | 0.970 |
| 49                                    | 4.81                    | 1.273           | 1.279 | 1.274 | 1.260 | 1.361 | 1.330 | 1.273 | 1.192 | 1.094 | 0.980 |
| 57.5                                  | 5.62                    | 1.278           | 1.287 | 1.283 | 1.269 | 1.371 | 1.343 | 1.288 | 1.208 | 1.112 | 0.999 |
| 65.5                                  | 6.38                    | 1.284           | 1.294 | 1.290 | 1.277 | 1.381 | 1.355 | 1.303 | 1.226 | 1.130 | 1.017 |
| 74                                    | 7.19                    | 1.290           | 1.301 | 1.298 | 1.284 | 1.390 | 1.367 | 1.317 | 1.241 | 1.145 | 1.032 |
| 82.5                                  | 7.99                    | 1.295           | 1.307 | 1.304 | 1.291 | 1.399 | 1.378 | 1.331 | 1.256 | 1.161 | 1.047 |
| 104                                   | 9.98                    | 1.308           | 1.321 | 1.321 | 1.308 | 1.419 | 1.405 | 1.362 | 1.291 | 1.196 | 1.082 |
| 126                                   | 12.00                   | 1.319           | 1.335 | 1.335 | 1.322 | 1.438 | 1.429 | 1.391 | 1.322 | 1.230 | 1.114 |
| 148.5                                 | 14.02                   | 1.329           | 1.346 | 1.347 | 1.335 | 1.453 | 1.447 | 1.412 | 1.347 | 1.255 | 1.139 |
| 171                                   | 16.01                   | 1.338           | 1.356 | 1.359 | 1.347 | 1.467 | 1.466 | 1.435 | 1.372 | 1.281 | 1.165 |
| 217                                   | 19.97                   | 1.352           | 1.374 | 1.378 | 1.366 | 1.491 | 1.497 | 1.472 | 1.413 | 1.323 | 1.206 |
| 267                                   | 24.12                   | 1.364           | 1.389 | 1.394 | 1.383 | 1.512 | 1.523 | 1.503 | 1.447 | 1.358 | 1.241 |

|     |       |       |       |       |       |       |       |       |       |       |       |
|-----|-------|-------|-------|-------|-------|-------|-------|-------|-------|-------|-------|
| 317 | 28.13 | 1.375 | 1.401 | 1.408 | 1.396 | 1.528 | 1.544 | 1.528 | 1.474 | 1.387 | 1.268 |
|-----|-------|-------|-------|-------|-------|-------|-------|-------|-------|-------|-------|

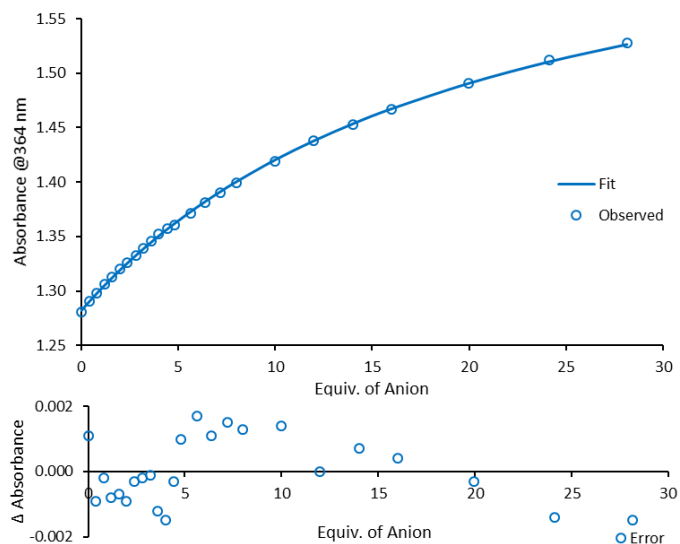

**Figure S65.** Fitting of 1:1 model to results of titration of  $2 \cdot 10^{-4}$  M solution of precursor **1** in DMSO/H<sub>2</sub>O 9:1 with 0.0125 M solution of TBAPhCOO.

Binding constants K derived from simultaneous fitting of 1:1 (receptor:anion) model to ten selected wavelengths using HypSpec:

$$\log K_{1:1} = 2.4092, \text{ Std Dev. } 0.0005$$

**Table S29.** Molar absorption coefficients derived from simultaneous fitting of 1:1 model to ten selected wavelengths using HypSpec.

|                             | Wavelength [nm] |      |      |      |      |      |      |      |      |      |
|-----------------------------|-----------------|------|------|------|------|------|------|------|------|------|
|                             | 348             | 349  | 350  | 351  | 364  | 365  | 366  | 367  | 368  | 369  |
| L [ $M^{-1}cm^{-1}$ ]       | 6147            | 6134 | 6080 | 6002 | 6434 | 6156 | 5764 | 5287 | 4768 | 4212 |
| L×PhCOO [ $M^{-1}cm^{-1}$ ] | 7417            | 7650 | 7745 | 7705 | 8528 | 8865 | 9007 | 8890 | 8510 | 7893 |

Binding constants K derived from an experiment repeated according to the same methodology (KB460B):

$$\log K_{1:1} = 2.4070 \text{ Std Dev. } 0.0009$$

Binding constant averaged from the above two experiments:

$$\log K_{1:1} = 2.4081, \text{ Std Dev. } -$$



## 5.3 Fluorescence Titrations

### General Procedure

To a solution of a host (2.5 mL,  $10^{-5}$  M) in a screw-cap fluorescence cuvette made of Quartz SUPRASIL (light path: 10 mm) appropriate aliquot of titrant (dissolved in the solution of host to avoid dilution) were added using a 25  $\mu$ l gas-tight microsyringe. Stream of argon was flushed through the solution of a host and the solution of titrant. Fluorescence spectra were obtained on Hitachi F-7000. Excitation wavelength: 350 nm, scan speed: 1200 nm/min, temperature: 25°C.

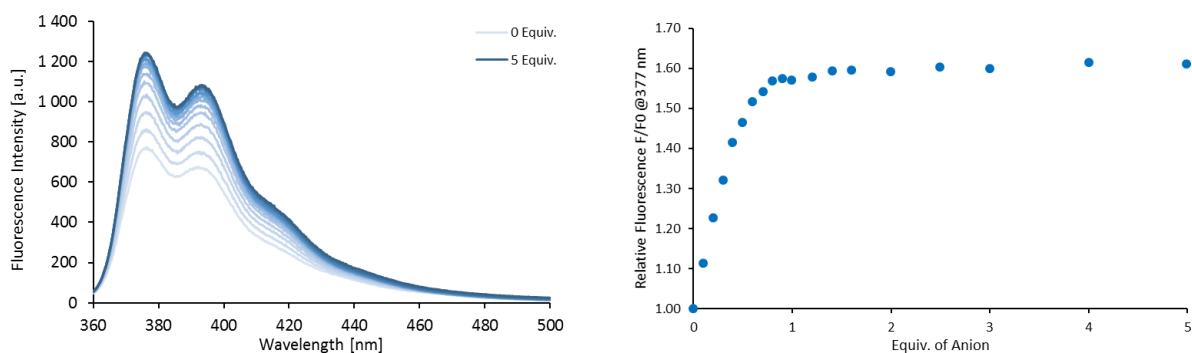

**Figure S66.** Emission spectra obtained during titration of  $10^{-5}$  M solution of catenane **A** in DMSO/10% H<sub>2</sub>O with  $6.25 \cdot 10^{-4}$  M solution of TBA<sub>2</sub>SO<sub>4</sub> (dissolved in the solution of catenane **A**).

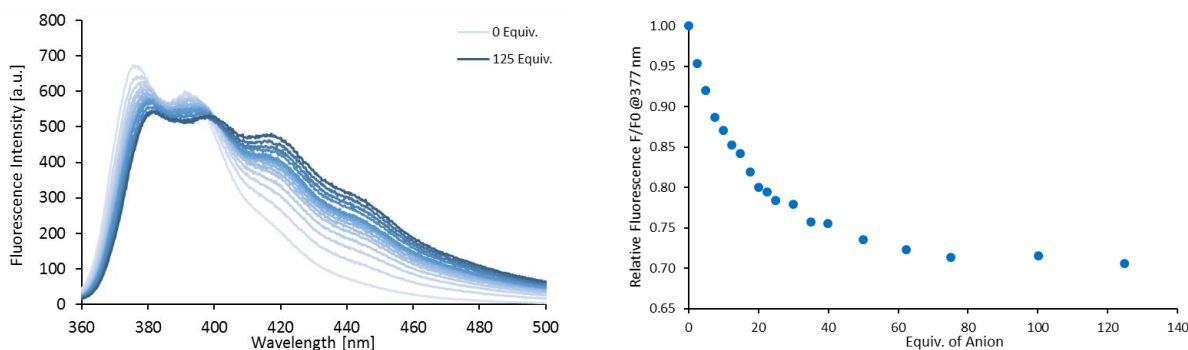

**Figure S67.** Emission spectra obtained during titration of  $10^{-5}$  M solution of catenane **A** in DMSO/10% H<sub>2</sub>O with 0.0156 M solution of TBAH<sub>2</sub>PO<sub>4</sub> (dissolved in the solution of catenane **A**).

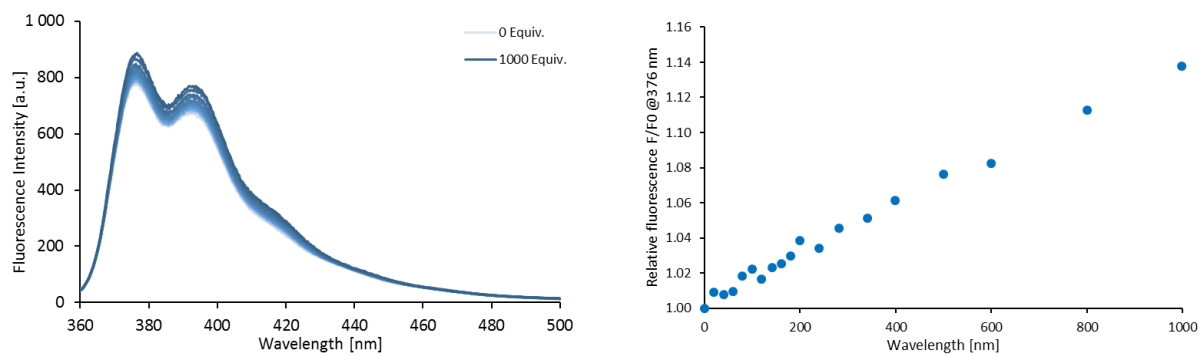

**Figure S68.** Emission spectra obtained during titration of  $10^{-5}$  M solution of catenane **A** in DMSO/10% H<sub>2</sub>O with 0.125 M solution of TBAPhCOO (dissolved in the solution of catenane **A**).

## 6. Computational Studies

### 6.1. Methods

#### Preparation of the starting structures for molecular dynamics simulations

The starting model of  $\mathbf{A} \times \text{SO}_4^{2-}$  was prepared on the basis of the crystal structure of the 2:1 (ligand:anion) complex of simple acyclic diamidocarbazoles bound to the sulfate anion.<sup>3</sup> Additional chains were manually added in Maestro software (Schrödinger Release 2017-1: Maestro, Schrödinger, LLC, New York, NY, 2017) and the entire system was minimized in OPLS 2005 force-field (with environment modelled as constant dielectric of DMSO) until energy convergence of 0.05 kJ/mol was obtained. The resulting structure was used as the starting point in conformational search and molecular dynamics (MD) simulations (see below). Next, we used the optimized structure of the 1:1 complex to obtain the initial conformation of the free catenane. More specifically, the sulfate ion was removed from the 1:1 complex, and the resulting free catenane was subjected to conformational sampling. For the 1:2 (catenane:sulfate) complex, the initial structure was a manually-built model with the two diamidocarbazole units positioned as far as possible from each other and sulfate ions added and minimized using the same approach as before.

#### Conformational search

The conformational sampling was performed in the MacroModel suite and OPLS 2015 force field using the following, non-standard search values: 50 kcal/mol energy window for saving structures, RMSD cutoff of 3 Å, 10000 simulation cycles, 10000 search steps in the low-scale low-mode conformational search and an enhanced torsion sampling protocol sampling all C-N and C-O single bonds.

#### Molecular dynamics simulations

The models of the free catenane and its 1:1 and 1:2 complexes obtained in the preparation step were subjected to molecular dynamics (MD) simulations. We used Charmm General Force Field v. 3.0.1 (CGenFF).<sup>4</sup> Catenanes and tetrabutylammonium ions (TBA) were parametrized using the CHARMM-GUI server, while the parameters and topologies for all other molecules were obtained directly from CGenFF. In all three cases (free catenane, 1:1 complex, 1:2 complex), the catenane/complex was immersed in the geometric center of the  $50 \times 50 \times 50$  Å periodic box of DMSO created using packmol software.<sup>5</sup> In the case of the 1:1 and 1:2 complexes, the appropriate number of TBA ions (two or four) were manually added to the box. In MD simulations, we used a standard, four-step approach. In the first step, the entire system was minimized for 1000 steps, while in the second step we performed 0.5 ns of NVT MD, both with the catenane/complex frozen. In the third step, we unfroze all coordinates and performed a 1000-step minimization, while the fourth step was a production run in the NPT ensemble for a variable amount of time. In all steps we used a 1 fs time step, a 12 Å cutoff of electrostatic and van der Waals interactions and a constant temperature of either 298.15 K (25°C) or 373.15 K (100°C, the increased temperature of 100°C was used to speed up the evolution of the system), and maintained constant pressure of 1 atm using Langevin barostat. MD simulations were performed using the NAMD ver. 2.11.<sup>6</sup>

#### Interaction energy calculations

Sulfate-catenane interaction energies were estimated using the GFN2-xTB tight-binding approach, as implemented in xtb ver.6.4.1. program.<sup>7,8</sup>

### 6.2. Results

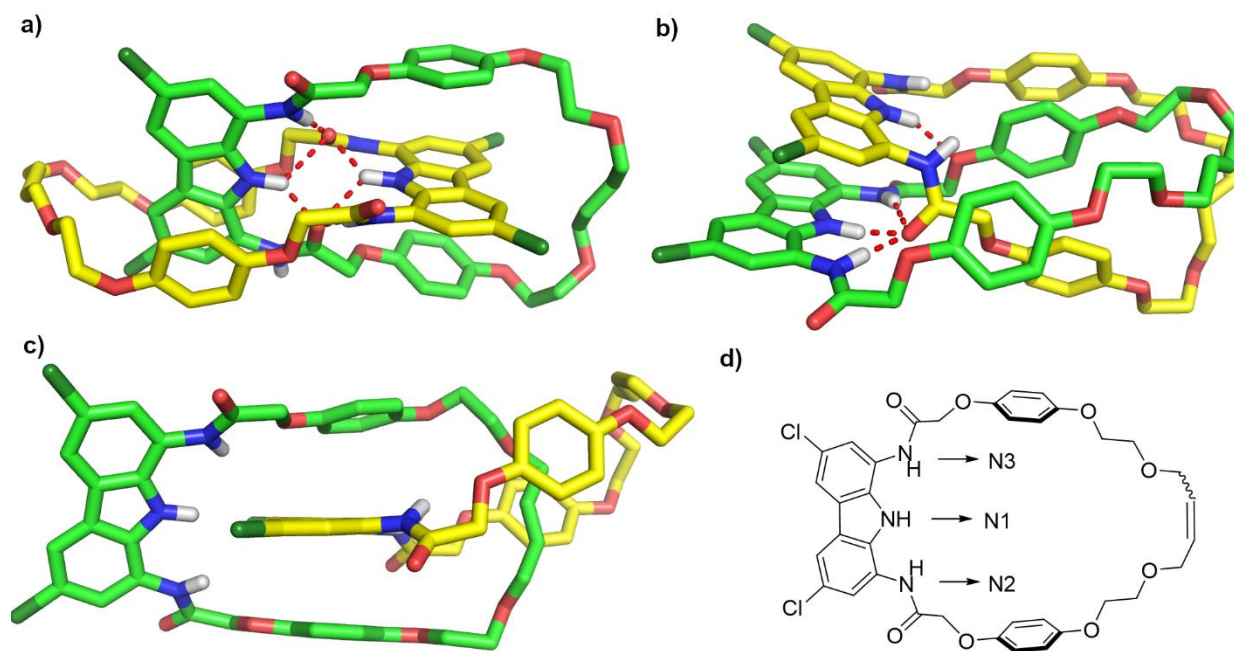

**Figure S69.** Low-energy conformations (a-c) of free catenene **A** obtained from conformational search and nitrogen atom naming scheme used throughout this study (d).

Molecular dynamics simulations of the three conformations revealed that the catenane is a very flexible system with multiple low-energy conformations occurring even during 100 ns simulations at 25°C. Conformation **a** is the most stable one with the average distance between the nitrogen atoms of diaminocarbazoles varying between 3.3 to 5.3 Å (average distance of 4.5 Å, see Figure S64). Interestingly, after 50 ns this conformation underwent a major change, breaking most of its hydrogen bonds and forming a new hydrogen bond network, which is almost identical to the original one, but formed by opposite C=O groups (Figure S65). The N1-N1 distance for conformation **b** does also not change much during the 100 ns simulation and has a similar average value of 4.6 Å. This conformation underwent, however, a major conformational change as the diamidocarbazoles switch from the  $\pi$ - $\pi$  stacking arrangement to an orthogonal conformation similar to conformation **a** and stabilized by multiple hydrogen bonds. Conformation **c** was also not stable over the time of the simulation and underwent major conformational changes, including rotations of the macrocycles with respect to each other.

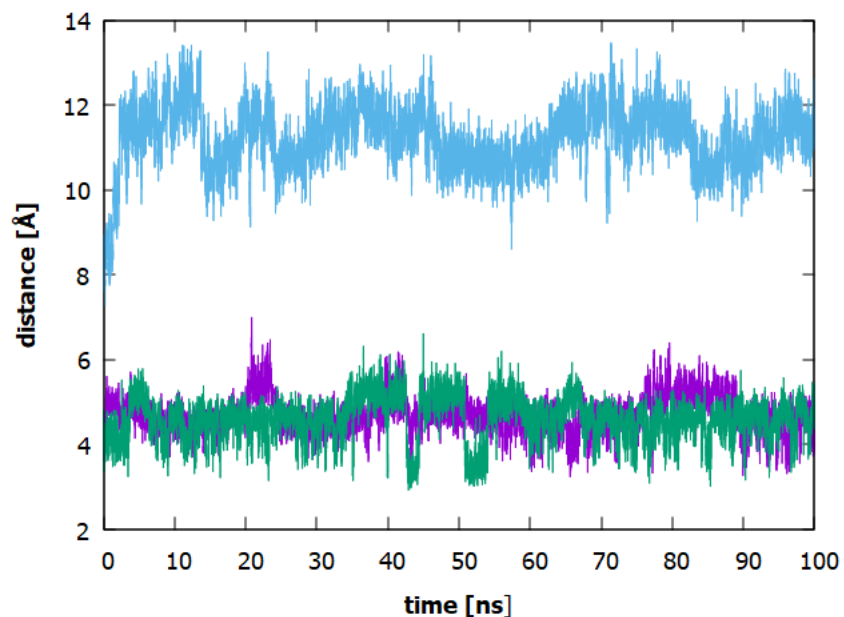

**Figure S70.** Plots of N1-N1 distances during 100 ns of MD simulation for catenane conformations **a** (purple), **b** (green) and **c** (cyan).

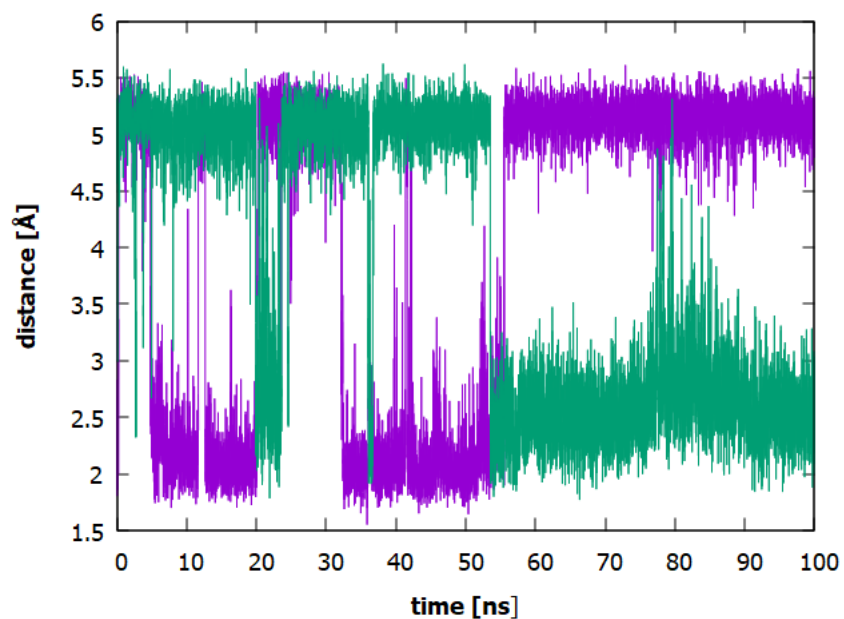

**Figure S71.** Selected O...H distances during 100 ns of MD simulation for a C=O oxygen atom forming a HB at the beginning of the MD simulation (purple) and for a C=O oxygen atom forming a HB at the end of the MD simulation (green) for catenane conformation **a**.

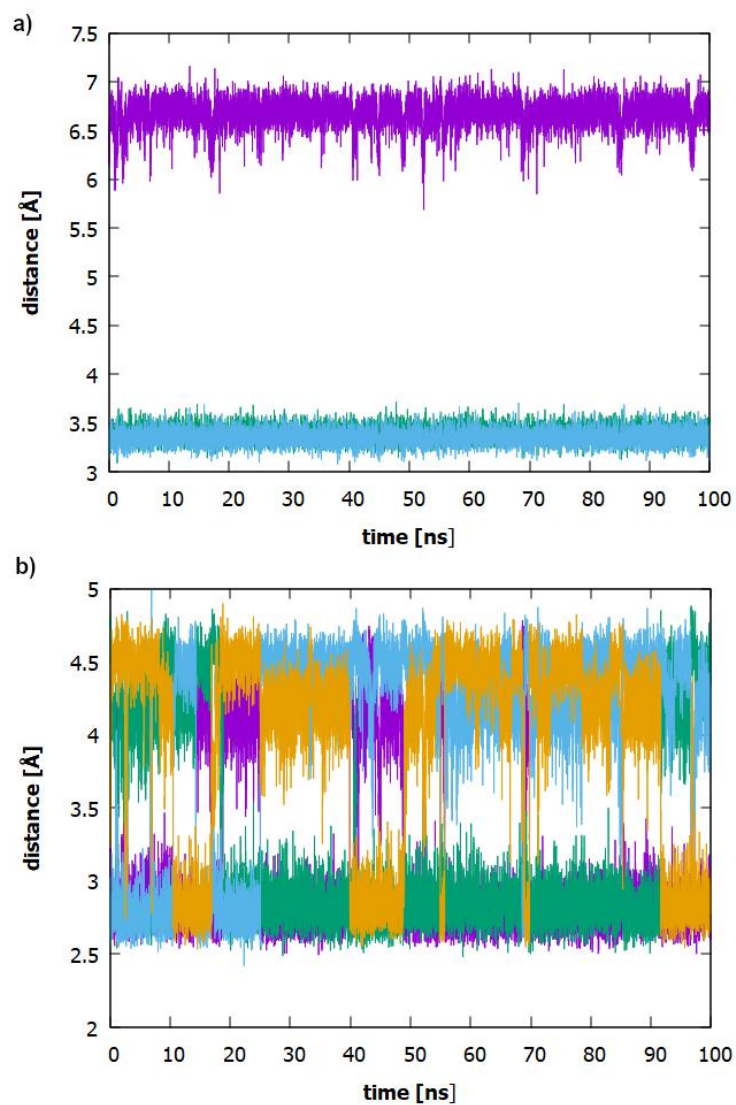

**Figure S72.** Plots of a) N1-N1 distance (purple) and N1-S distances (green and cyan) and b) N1-O(SO<sub>4</sub><sup>2-</sup>) distances during 100 ns of MD simulation of the 1:1 complex.

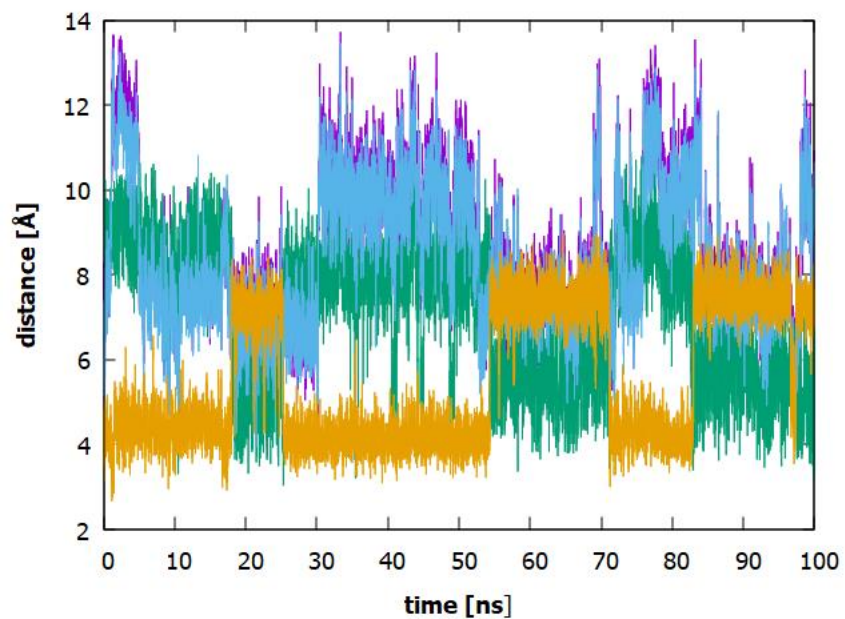

**Figure S73.** Plots of H-H distances during 100 ns of MD simulation of the 1:1 complex corresponding to expected contacts in the 2D ROESY spectra, as defined in Figure 4 of the manuscript: 2-B (purple), 2-C (green), 4-B (cyan) and 4-C (yellow).

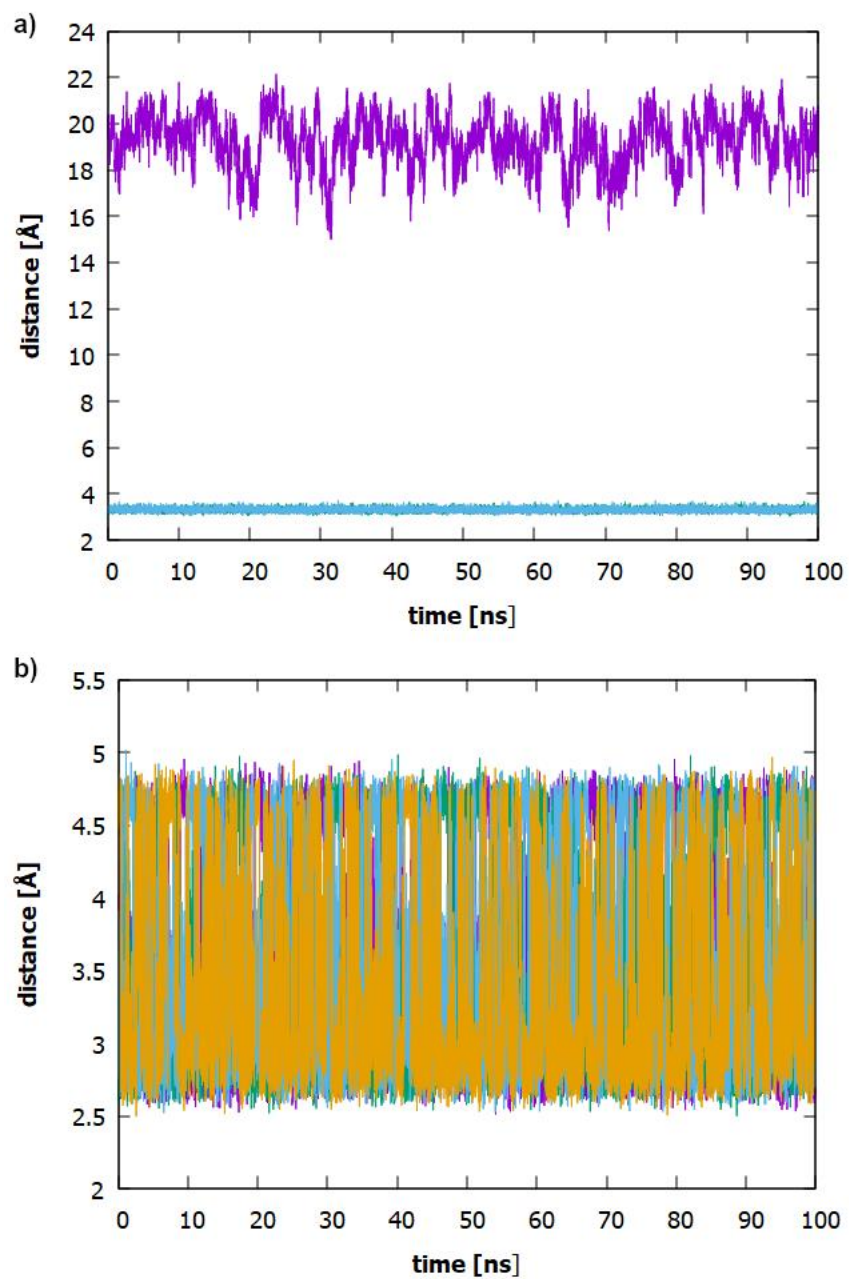

**Figure S74.** Plots of a) N1-N1 distance (purple) and N1-S distances (green and cyan) and b) N1-O(SO<sub>4</sub><sup>2-</sup>) distances during 100 ns of MD simulation of the 1:2 complex.



### Switching between the 1:2 and 1:1 complexes

To gain a better insight into the dynamics of sulfate binding, we also modelled switching between the 1:2 and 1:1 complex. First, we chose 10 different MD snapshots from the 100 ns run of the 1:2 complex (five with the lowest potential energy of the entire complex and five with the highest potential energy). To prepare the first set of 10 MD simulations, we removed one of the sulfate ions and two random TBA molecules, while in the second set we removed the other sulfate ion and the same two TBA molecules. We performed 50 ns MD on all 20 different sets. All MD runs were based on the same starting point, which was the lowest potential energy snapshot of the initial 1:2 100 ns MD run. Since the motions of the macrocycles were relatively slow at room temperature, we decided to perform the simulations at 100°C.

During these 20 different MD runs we observed two radically different macrocycle motions, leading to two different conformations of the 1:1 complex, which we analyze below.

The first set resulted in a very fast change in catenane conformation, which converged to the low-energy conformation of the 1:1 complex in less than 1 ns (Fig. S68 and S69). The plots of the N1-S distances show a drastic and very rapid change of one of these distances, from 17 Å to 3.5 Å, upon drastic co-conformational change driven by chelation of the sulfate by the second diamidocarbazole moiety. After switching to this low energy co-conformation, the system became very stable with respect to both its energy and geometry, similarly to the previously described 1:1 complex. However, we can observe a relatively large rotational freedom of the bound sulfate, manifested by the rapid changes in the N1/N1-O distance lengths.

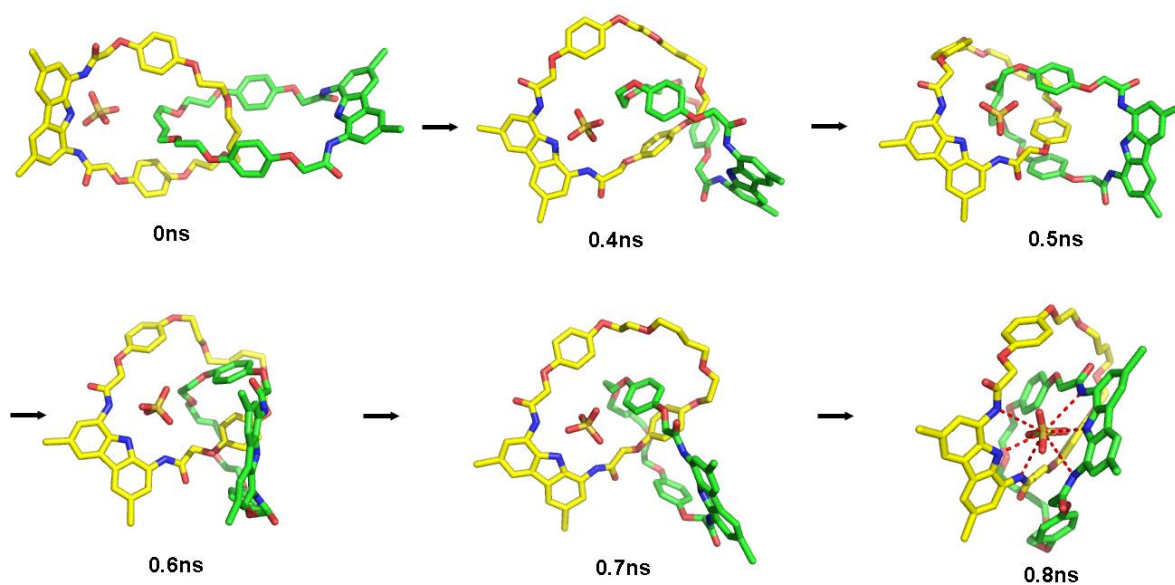

**Figure S75.** Evolution of the 1:2 catenane complex upon removal of one sulfate anion – simulation 1.

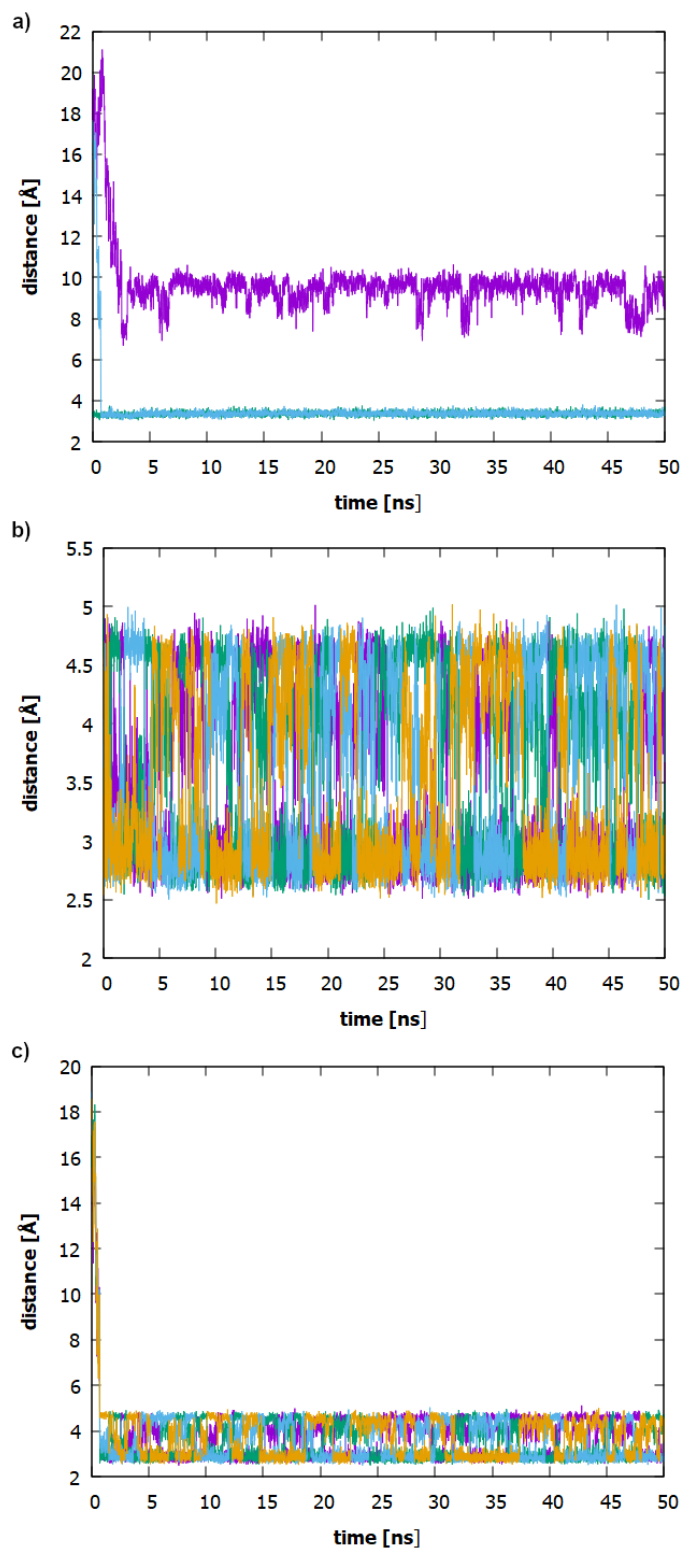

**Figure S76.** Plots of a) N1-N1 distance (purple) and N1-S distances (green and cyan) and b) and c) N1-O(SO<sub>4</sub><sup>2-</sup>) distances during 50 ns of MD simulation of the 1:2 to 1:1 switch – simulation 1.

The second set (with the other sulfate removed) also resulted in a fast change in the catenane conformation, but the final, metastable conformation was attained after 2.6 ns and was different from the lowest energy conformation of the 1:1 complex attained in the previous case (Fig. S70). Here the macrocycle that has no sulfate bound undergoes a number of rotations around the sulfate-bound macrocycle and finally ends up with the N2 amide nitrogen atom forming a hydrogen bond to the sulfate, while both N1 and N3 are positioned further away from the sulfate and with no direct interactions. As a result, the sulfate is bound more weakly than in the previous 1:1 complex and the N1'-S distance remains relatively large (on average 6.5 Å), while the N2-S distance varies similarly to the N1-S distance with an average of 3.5 Å (Fig. S71). Based on these results, we suggest that upon 1:2 to 1:1 switching it is likely that the 1:1 complex is temporarily trapped in this metastable conformation, with only four NHs interacting with the sulfate, but ultimately likely also converges to the lowest-energy conformation with all six NHs interacting with the sulfate.

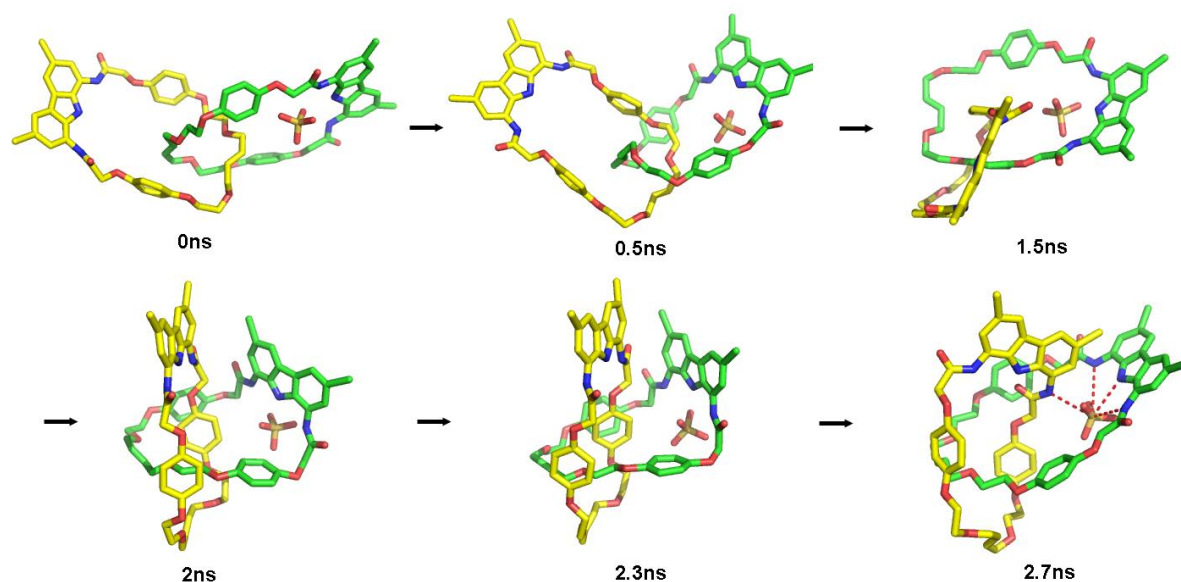

**Figure S77.** Evolution of the 1:2 catenane complex upon removal of one sulfate anion – simulation 2.

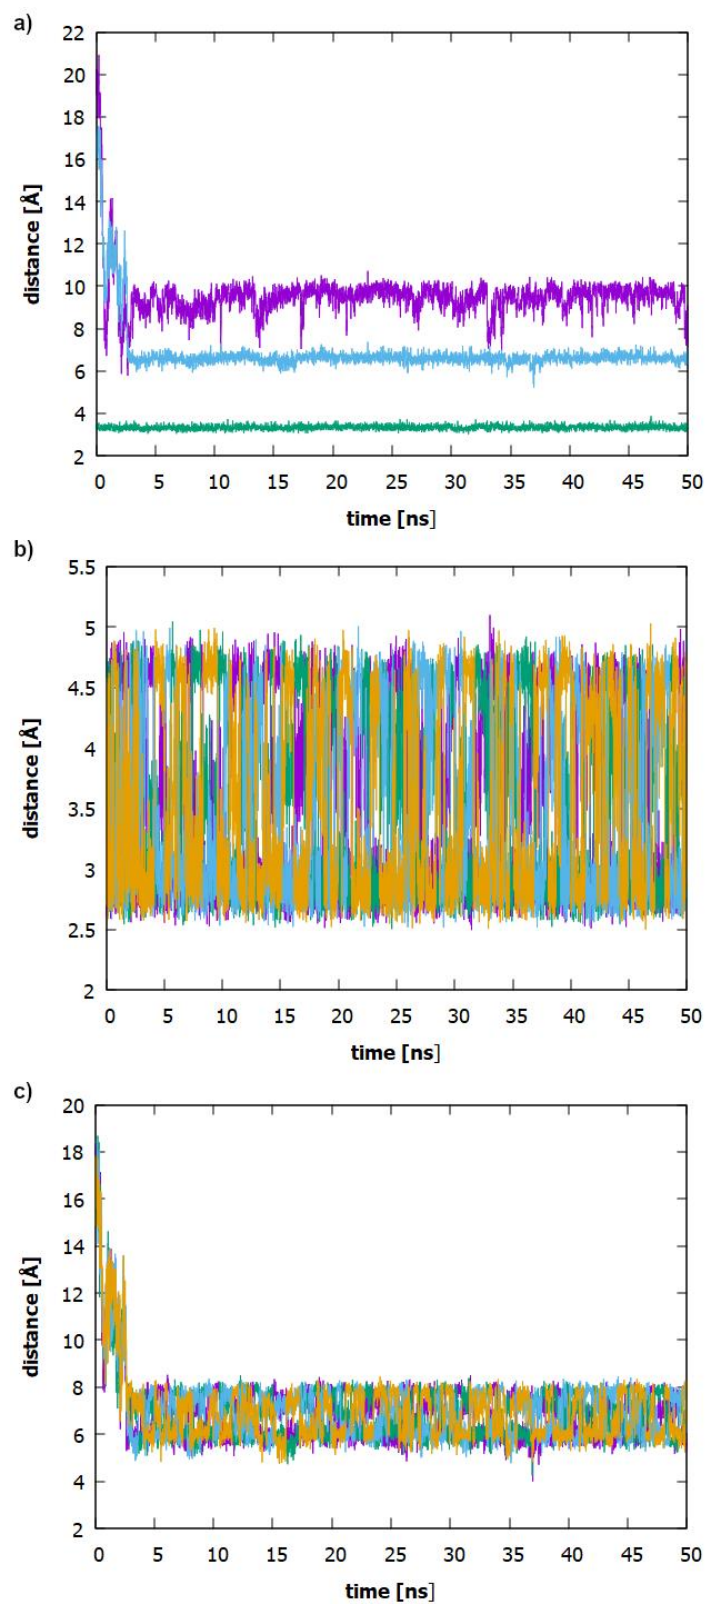

**Figure S78.** Plots of a) N1-N1 distance (purple) and N1-S distances (green and cyan) and b) and c) N1-O(SO<sub>4</sub><sup>2-</sup>) distances during 50 ns of MD simulation of the 1:2 to 1:1 switch – simulation 2.

### 6.3. Conformation Search for 2:1 Complexes of Macrocycle **3**

A conformational search for 2:1 (receptor:anion) complexes of macrocycle **3** with sulfate has been performed using the Conformer–Rotamer Ensemble Sampling Tool with the GFN2-xTB approach (see 10.1039/C9CP06869D and 10.1021/acs.jctc.8b01176). We found that within a 6 kcal/mol window there are seven conformers with the sulfate bound by both macrocycles which are either in orthogonal-like arrangement or flat & sandwich-like arrangement.

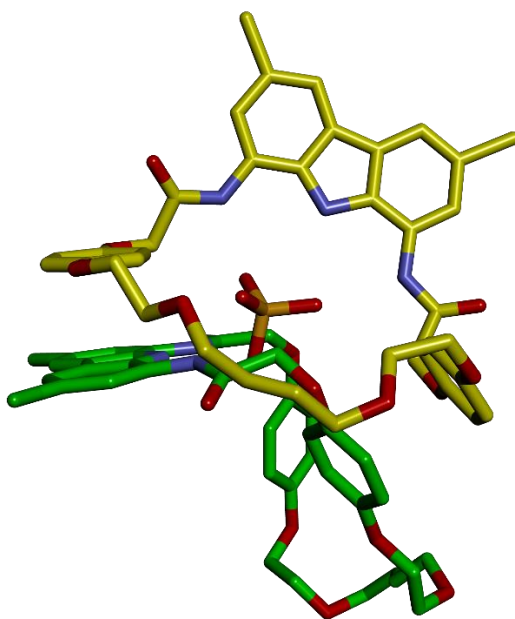

**Figure S79.** Example of an orthogonal arrangement of  $3 \times \text{SO}_4^{2-} \times 3$  complex. The lowest energy conformer.

**Table S30.** Cartesian coordinates of atoms in the lowest energy orthogonal arrangement of  $3 \times \text{SO}_4^{2-} \times 3$  complex.

|               |               |               |               |
|---------------|---------------|---------------|---------------|
| 169           |               |               |               |
| -309.15636215 |               |               |               |
| Cl            | 1.1613673975  | -8.5402658011 | 0.3444451428  |
| Cl            | 4.4063081719  | -3.3347126028 | -5.5594733633 |
| O             | 1.7808349286  | 0.8329831520  | -4.1487787015 |
| O             | -1.5580059548 | -5.0661205513 | 2.9282689847  |
| N             | -0.5376226563 | -3.7836867277 | 1.3331432585  |
| H             | -0.4585460488 | -2.8112277747 | 1.0218926387  |
| H             | 0.5494994843  | -2.1076393324 | -0.4208480225 |
| N             | 1.7194798690  | -0.4516039391 | -2.2633243628 |
| H             | 1.5364754939  | -0.4155317356 | -1.2483108284 |
| C             | 1.1037913710  | -6.8449089218 | 0.0039163329  |
| C             | 1.8246637642  | -6.3577975028 | -1.0657990171 |
| H             | 2.4125652941  | -7.0135909206 | -1.6857963810 |
| C             | 1.7565675915  | -4.9866443103 | -1.3041402141 |

|   |                |               |               |
|---|----------------|---------------|---------------|
| C | 0.2348099483   | -4.6852988978 | 0.6111536747  |
| C | 0.3112548600   | -6.0511071208 | 0.8351629828  |
| H | -0.2429880073  | -6.4935947372 | 1.6460732190  |
| C | -1.3250555987  | -3.9888345725 | 2.4016658984  |
| C | -1.9238657386  | -2.6728165438 | 2.9193711921  |
| H | -1.3001007774  | -2.3397006338 | 3.7550986127  |
| H | -1.8732490682  | -1.9056277636 | 2.1389377082  |
| C | 1.8522354525   | -2.8118334389 | -1.9597608222 |
| C | 2.1845227698   | -1.6855381746 | -2.7169859775 |
| C | 2.9668333167   | -1.8824021120 | -3.8414154255 |
| H | 3.2367578805   | -1.0471032455 | -4.4649566119 |
| C | 3.4151274726   | -3.1642690688 | -4.1581401093 |
| C | 3.1200519987   | -4.2852525986 | -3.4126489466 |
| H | 3.4954588973   | -5.2550985776 | -3.6931378327 |
| C | 2.3142559777   | -4.1063847604 | -2.2913331124 |
| C | 1.6030081414   | 0.6966168696  | -2.9478218945 |
| C | 1.2170910558   | 1.8845997535  | -2.0485860086 |
| H | 0.8625483827   | 1.5287628588  | -1.0753536175 |
| H | 2.1286807619   | 2.4741442555  | -1.8896384580 |
| O | -3.2181985920  | -2.8248470120 | 3.4471882278  |
| C | -6.3831115140  | -4.0832181670 | 1.0433885212  |
| C | -6.5187937862  | -3.9058323528 | 2.4231648955  |
| C | -5.4523582487  | -3.4912635203 | 3.1858426322  |
| C | -4.2119898031  | -3.2358872964 | 2.5951036596  |
| C | -4.0786355206  | -3.3966833475 | 1.2239357733  |
| C | -5.1547605743  | -3.8184566513 | 0.4546095164  |
| H | -7.4747950873  | -4.1104127092 | 2.8769678502  |
| H | -5.5478622225  | -3.3600797459 | 4.2514907497  |
| H | -3.1396548281  | -3.1922761069 | 0.7325119671  |
| H | -5.0038431406  | -3.9312156644 | -0.6076793501 |
| O | -7.5031486119  | -4.5197090007 | 0.3971917663  |
| C | -7.4636835252  | -4.7793956879 | -0.9936463998 |
| H | -6.5647469621  | -5.3506067484 | -1.2515354429 |
| H | -8.3458032682  | -5.3967923086 | -1.1831885082 |
| C | -7.5507207020  | -3.5154648341 | -1.8717110062 |
| H | -6.9370399791  | -2.7175649132 | -1.4343311230 |
| H | -7.1712540905  | -3.7545907502 | -2.8685982724 |
| O | -8.8733639449  | -3.0754347304 | -2.0741477837 |
| C | -9.4448396787  | -2.3908700915 | -0.9726137570 |
| H | -9.2905803177  | -2.9581257851 | -0.0460272797 |
| H | -10.5191413128 | -2.3659842218 | -1.1855029920 |
| C | -8.9411616279  | -0.9840097644 | -0.7878562035 |
| C | -8.2856650205  | -0.2999833667 | -1.7105838509 |
| C | -7.7578341108  | 1.0932983610  | -1.5319376569 |
| H | -6.6645866985  | 1.0600871634  | -1.4265901274 |
| H | -8.1808463114  | 1.5469363223  | -0.6314550300 |
| H | -8.0985298383  | -0.7558845978 | -2.6733470538 |
| H | -9.1472507326  | -0.5521335095 | 0.1822048908  |
| O | 0.3102713646   | 2.7667246543  | -2.6615879523 |
| C | -3.7515481466  | 1.9033198147  | -3.0175118579 |
| C | -3.2033286145  | 3.0875404744  | -3.4990470161 |
| C | -1.8504505845  | 3.3271578115  | -3.3682839240 |
| C | -1.0114675398  | 2.4048804031  | -2.7482020569 |
| C | -1.5573972290  | 1.2217806998  | -2.2624788517 |
| C | -2.9107163122  | 0.9806481206  | -2.3995933630 |
| H | -3.8154873618  | 3.8384259761  | -3.9693058078 |
| H | -1.4308184586  | 4.2490219391  | -3.7357945680 |
| H | -0.9512148156  | 0.4850054580  | -1.7572500983 |
| H | -3.3309232692  | 0.0640442096  | -2.0138227904 |

|    |               |               |               |
|----|---------------|---------------|---------------|
| O  | -5.0682784917 | 1.5562968823  | -3.1077609020 |
| C  | -5.9690240582 | 2.4752739250  | -3.7049831933 |
| H  | -5.6370737633 | 2.7123117031  | -4.7241243422 |
| H  | -6.0186890672 | 3.3994899060  | -3.1153606486 |
| C  | -7.3652724923 | 1.8353325308  | -3.7773041619 |
| H  | -7.2473729058 | 0.7858471282  | -4.0716546779 |
| H  | -7.9481817046 | 2.3606111574  | -4.5374720588 |
| O  | -8.1192882648 | 1.9635414023  | -2.5965718538 |
| N  | 1.0599996789  | -2.8722169573 | -0.8575434861 |
| C  | 0.9782025283  | -4.1669634537 | -0.4545483112 |
| S  | 0.3189693234  | -0.5718791134 | 1.1944437771  |
| O  | 0.7038257111  | -1.4470170681 | 2.3175364774  |
| O  | -0.3129481052 | 0.6558174607  | 1.7170354335  |
| O  | 1.5130634394  | -0.1833562984 | 0.4186060651  |
| O  | -0.6617766776 | -1.2460368432 | 0.3093624150  |
| Cl | -0.5144678267 | 5.3839666232  | 7.5533465315  |
| Cl | 6.3438236386  | 0.6171813127  | 6.7186627279  |
| O  | 5.3343153689  | -1.5737999669 | 2.3879908327  |
| O  | -2.9193826726 | 4.1744188589  | 3.3602298176  |
| N  | -1.3510011325 | 2.5062672561  | 3.3993256567  |
| H  | -0.9918797415 | 1.7341052955  | 2.8328060928  |
| H  | 0.8701977354  | 0.8100735772  | 3.0555369870  |
| N  | 3.2301748736  | -0.8417572532 | 2.9336306709  |
| H  | 2.2399538410  | -0.9621386443 | 2.6599635950  |
| C  | -0.0128832101 | 4.1575135033  | 6.4430955557  |
| C  | 1.2069687526  | 3.5455003847  | 6.6234812641  |
| H  | 1.8581790543  | 3.8158220232  | 7.4372047930  |
| C  | 1.5607287625  | 2.5621375315  | 5.7029597417  |
| C  | -0.5325648548 | 2.8623035170  | 4.4702868450  |
| C  | -0.8747107215 | 3.8381070595  | 5.3957032229  |
| H  | -1.8113003726 | 4.3587452718  | 5.2904409773  |
| C  | -2.4294299578 | 3.1550713659  | 2.9072810586  |
| C  | -3.0315851835 | 2.4369810060  | 1.6868480197  |
| H  | -2.2745715623 | 1.8070494458  | 1.2051444587  |
| H  | -3.8438516956 | 1.7950367841  | 2.0458509434  |
| C  | 2.5071674911  | 0.9253226945  | 4.4272943981  |
| C  | 3.4791117534  | -0.0009119315 | 4.0168207222  |
| C  | 4.6554095271  | -0.0592257103 | 4.7534969312  |
| H  | 5.4266479534  | -0.7504368636 | 4.4585674412  |
| C  | 4.8495491198  | 0.7622305965  | 5.8609657297  |
| C  | 3.9071745740  | 1.6653890945  | 6.2969444920  |
| H  | 4.0776304369  | 2.2861544214  | 7.1598928152  |
| C  | 2.7263860410  | 1.7421638224  | 5.5636275108  |
| C  | 4.1211219284  | -1.5984708682 | 2.2596940275  |
| C  | 3.4127854274  | -2.5352706270 | 1.2749341462  |
| H  | 2.9759717985  | -3.3610481477 | 1.8473005005  |
| H  | 2.5988150486  | -1.9811410749 | 0.8013013555  |
| O  | -3.6368637356 | 3.3243162708  | 0.7803582637  |
| C  | -1.3812215477 | 6.0710845929  | -1.4006166083 |
| C  | -2.7772198520 | 6.0336560560  | -1.4598955647 |
| C  | -3.4885009797 | 5.1181471874  | -0.7213322777 |
| C  | -2.8300809428 | 4.2019993298  | 0.1014474117  |
| C  | -1.4457197686 | 4.2394374526  | 0.1675125940  |
| C  | -0.7282749314 | 5.1694560368  | -0.5722832782 |
| H  | -3.2801651408 | 6.7407029543  | -2.0992696085 |
| H  | -4.5653014108 | 5.0869766493  | -0.7607699533 |
| H  | -0.9001851397 | 3.5410840416  | 0.7848131337  |
| H  | 0.3475098239  | 5.1619298980  | -0.4885588141 |
| O  | -0.7915270650 | 7.0355935343  | -2.1668896681 |

|   |              |               |               |
|---|--------------|---------------|---------------|
| C | 0.6133581816 | 7.1125180239  | -2.2648751875 |
| H | 0.7940084838 | 8.0692431130  | -2.7606162615 |
| H | 1.0788289885 | 7.1212732831  | -1.2710841235 |
| C | 1.2414794514 | 5.9991668878  | -3.1100974059 |
| H | 2.3363107379 | 6.0373659836  | -2.9915631098 |
| H | 0.8929851981 | 5.0158016781  | -2.7693264706 |
| O | 0.8823330175 | 6.1913843127  | -4.4605139359 |
| C | 1.2051844021 | 5.0926512495  | -5.2930230360 |
| H | 0.6939952804 | 5.3073255962  | -6.2381029608 |
| H | 0.8076037556 | 4.1583361128  | -4.8729698508 |
| C | 2.6787823155 | 4.9465030891  | -5.5457428307 |
| C | 3.3360777336 | 3.8014264155  | -5.4633137464 |
| C | 4.7951746254 | 3.6556683265  | -5.7925152083 |
| H | 5.2483232477 | 4.6396625696  | -5.9390704630 |
| H | 4.8943207789 | 3.0717325372  | -6.7230461384 |
| H | 2.8218791486 | 2.8956318032  | -5.1691187031 |
| H | 3.1867712751 | 5.8596028159  | -5.8279581844 |
| O | 4.2737928934 | -3.1304982156 | 0.3353026252  |
| C | 6.0174414594 | -0.8698547718 | -2.7008052759 |
| C | 6.2601227959 | -2.2379799151 | -2.5572609449 |
| C | 5.6671877393 | -2.9535694036 | -1.5434982002 |
| C | 4.8131087723 | -2.3252143315 | -0.6341153952 |
| C | 4.5670024204 | -0.9679694187 | -0.7778485224 |
| C | 5.1622324405 | -0.2486081142 | -1.8034179264 |
| H | 6.9201017046 | -2.7188542292 | -3.2608590877 |
| H | 5.8509290144 | -4.0094206157 | -1.4291221012 |
| H | 3.9010845346 | -0.4506997895 | -0.1061738324 |
| H | 4.9325584754 | 0.8026122685  | -1.8843093368 |
| O | 6.6781355214 | -0.2581621084 | -3.7306169700 |
| C | 6.6373071963 | 1.1451180081  | -3.8596735703 |
| H | 7.5369275727 | 1.4080632878  | -4.4233685240 |
| H | 6.6806962801 | 1.6418427005  | -2.8841024467 |
| C | 5.4175293369 | 1.6554417804  | -4.6413122513 |
| H | 4.4836529161 | 1.3981301137  | -4.1203431646 |
| H | 5.3940478074 | 1.1703480965  | -5.6289902288 |
| O | 5.5748147681 | 3.0489427393  | -4.7752976434 |
| N | 1.2848400614 | 1.2223459896  | 3.8889373220  |
| C | 0.6999473587 | 2.2096502040  | 4.6372380602  |



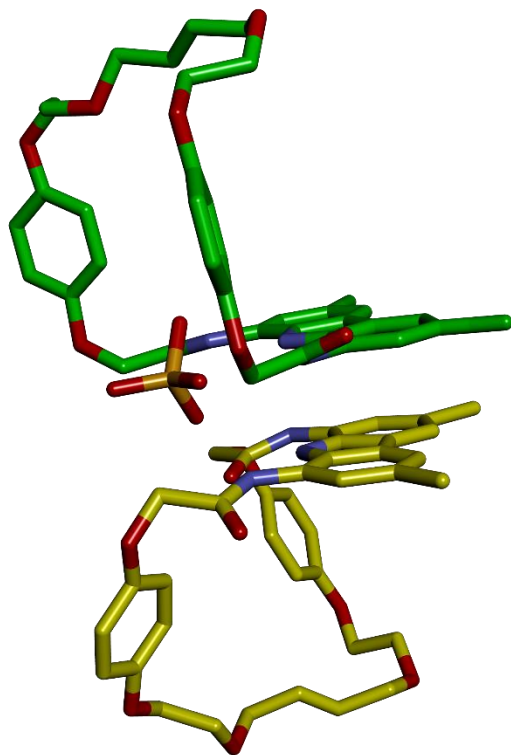

**Figure S80.** Example of an sandwich-like arrangement of  $3 \times \text{SO}_4^{2-} \times 3$  complex. The fifth lowest energy conformer.

**Table S31.** Cartesian coordinates of atoms in the fifth lowest energy arrangement of  $3 \times \text{SO}_4^{2-} \times 3$  complex (sandwich-like arrangement;  $\Delta E = 5.1$  kcal/mol in relation to the lowest energy arrangement).

|     |               |               |               |
|-----|---------------|---------------|---------------|
| 169 |               |               |               |
|     | -309.14822978 |               |               |
| Cl  | -2.9020197330 | 1.4687878888  | 5.5555806716  |
| Cl  | 2.1380084932  | -5.1030652682 | 4.2116278127  |
| O   | -0.9823181190 | -2.6570023612 | -1.5276055842 |
| O   | -4.5532011137 | 2.1284584379  | 0.8675170353  |
| N   | -2.6369177623 | 0.9514025026  | 0.4649740764  |
| H   | -1.9178209140 | 0.8120497091  | -0.2718713765 |
| H   | -0.9680685934 | -1.2258822677 | -0.0909432165 |
| N   | 0.7236248095  | -3.7215015660 | -0.4147909669 |
| H   | 1.4404971631  | -4.4142039488 | -0.6054690163 |
| C   | -2.3191400543 | 0.6466915920  | 4.1519462502  |
| C   | -1.4795165023 | -0.4340230346 | 4.3044716283  |
| H   | -1.1911474317 | -0.7820333815 | 5.2816449117  |
| C   | -1.0286337051 | -1.0469632682 | 3.1398052106  |
| C   | -2.2769124912 | 0.5288840185  | 1.7393876699  |
| C   | -2.7236410765 | 1.1263116421  | 2.9089675289  |
| H   | -3.3890301360 | 1.9713318568  | 2.8501664286  |
| C   | -3.6525900210 | 1.7595827432  | 0.1249691942  |
| C   | -3.6121489303 | 2.1702049204  | -1.3514485269 |
| H   | -3.2792565089 | 3.2126339604  | -1.3853087590 |

|   |               |                |               |
|---|---------------|----------------|---------------|
| H | -2.8706088990 | 1.5838754964   | -1.8993568955 |
| C | -0.1253972380 | -2.3429453982  | 1.4906261770  |
| C | 0.6099595780  | -3.3998143858  | 0.9441248748  |
| C | 1.2921275239  | -4.2327679085  | 1.8234187300  |
| H | 1.8832905535  | -5.0466841144  | 1.4327148073  |
| C | 1.2395246424  | -4.0352534887  | 3.1987612149  |
| C | 0.4967129865  | -3.0223045973  | 3.7658969024  |
| H | 0.4557914050  | -2.8806749546  | 4.8324883159  |
| C | -0.1894834467 | -2.1812781306  | 2.9005391671  |
| C | -0.0393368387 | -3.4309940745  | -1.4892098249 |
| C | 0.4044498149  | -4.2289235803  | -2.7209923577 |
| H | -0.4468896889 | -4.3167956004  | -3.4066266836 |
| H | 1.1947466388  | -3.6535450656  | -3.2171510060 |
| O | -4.8823571869 | 2.1568917800   | -1.9572170105 |
| C | -6.8427701932 | -1.4158234197  | -2.8341937117 |
| C | -7.4080952110 | -0.1665211295  | -3.1046820965 |
| C | -6.7348552527 | 0.9908108079   | -2.7925586733 |
| C | -5.4684764385 | 0.9427546045   | -2.2005810327 |
| C | -4.9096400938 | -0.2960232476  | -1.9220502028 |
| C | -5.5933317531 | -1.4640325172  | -2.2343593639 |
| H | -8.3806471732 | -0.1330886335  | -3.5675334567 |
| H | -7.1633219339 | 1.9577109476   | -3.0004447755 |
| H | -3.9333526391 | -0.3700897750  | -1.4684655641 |
| H | -5.1154542601 | -2.4019887683  | -1.9991688644 |
| O | -7.5945119305 | -2.4895213252  | -3.2192531785 |
| C | -7.1308052476 | -3.8058393480  | -3.0056950836 |
| H | -7.7307533276 | -4.4223154261  | -3.6818851472 |
| H | -6.0736901749 | -3.8968506787  | -3.2821880364 |
| C | -7.3922282005 | -4.2940606032  | -1.5639481962 |
| H | -6.6141777784 | -3.9323736661  | -0.8806600715 |
| H | -8.3528739823 | -3.8833539215  | -1.2412754562 |
| O | -7.5435187512 | -5.6913795855  | -1.4948996161 |
| C | -6.3494008853 | -6.4639527797  | -1.5152578544 |
| H | -5.6531873412 | -6.0776584387  | -2.2714169448 |
| H | -6.6788093760 | -7.4634805014  | -1.8088751175 |
| C | -5.6737563391 | -6.5230522679  | -0.1720827050 |
| C | -5.7372620948 | -7.5748554114  | 0.6298098448  |
| C | -5.1140254106 | -7.6473347959  | 1.9934544786  |
| H | -5.9097478423 | -7.6332325380  | 2.7461407905  |
| H | -4.4567579080 | -6.7803953728  | 2.1589093339  |
| H | -6.2713434997 | -8.4648977575  | 0.3266242000  |
| H | -5.1504095051 | -5.6278794422  | 0.1422427971  |
| O | 0.9688700629  | -5.4782948253  | -2.4163729761 |
| C | -1.3570742134 | -8.5866707024  | -0.8835633453 |
| C | -0.0339457456 | -8.7784503972  | -1.2931547453 |
| C | 0.7020039616  | -7.7350830817  | -1.8052617319 |
| C | 0.1364324520  | -6.4649288079  | -1.9242578164 |
| C | -1.1771164160 | -6.2707049873  | -1.5295958178 |
| C | -1.9190339505 | -7.3233566422  | -1.0119285171 |
| H | 0.3944299403  | -9.7622948836  | -1.1968591734 |
| H | 1.7241000132  | -7.8731590856  | -2.1177373713 |
| H | -1.6400482015 | -5.2986102338  | -1.6043901468 |
| H | -2.9364266058 | -7.1257498469  | -0.7126777860 |
| O | -1.9904153571 | -9.6939217633  | -0.4041492349 |
| C | -3.2641632706 | -9.5698402036  | 0.1944183382  |
| H | -3.6501862636 | -10.5899223351 | 0.2520255732  |
| H | -3.9398457959 | -8.9699497143  | -0.4248037553 |
| C | -3.1663062020 | -8.9807446129  | 1.6152321186  |
| H | -2.6461514149 | -8.0129209046  | 1.5782384250  |

|    |               |               |               |
|----|---------------|---------------|---------------|
| H  | -2.5817438369 | -9.6637880349 | 2.2380420835  |
| O  | -4.4152254042 | -8.8507539802 | 2.2505626713  |
| N  | -0.8717660845 | -1.3635738732 | 0.9042128771  |
| C  | -1.4170526687 | -0.5686954992 | 1.8702301451  |
| S  | -0.3750025711 | 2.0730117164  | -1.5995388797 |
| O  | -0.8793394395 | 2.9054475867  | -0.4816533851 |
| O  | -0.8859655279 | 2.5511113810  | -2.8863319682 |
| O  | 1.1136068687  | 2.1899220826  | -1.5742623995 |
| O  | -0.7709539093 | 0.6513067508  | -1.3833023564 |
| Cl | 1.4522836727  | 1.2395183904  | 6.6210208551  |
| Cl | 4.7784815900  | -3.7439614499 | 0.7183744574  |
| O  | 2.4114638071  | -1.8617274022 | -3.3478947395 |
| O  | -0.5801553927 | 4.6569224645  | 3.7633618554  |
| N  | -0.3168727512 | 3.0303194487  | 2.1746925303  |
| H  | -0.4945830147 | 2.8400601827  | 1.1766839733  |
| H  | 0.8136442533  | 1.3834492668  | 0.0666911869  |
| N  | 1.8895771150  | -0.3065781932 | -1.7607527540 |
| H  | 1.4281805781  | 0.6108907833  | -1.6433446328 |
| C  | 1.3789933306  | 1.1664361270  | 4.8984899231  |
| C  | 2.0850350951  | 0.1899466483  | 4.2344543065  |
| H  | 2.6912330035  | -0.5256031299 | 4.7634302318  |
| C  | 1.9738279074  | 0.1722217367  | 2.8488697446  |
| C  | 0.4696476821  | 2.1051533606  | 2.8612458465  |
| C  | 0.5923202071  | 2.1099600955  | 4.2441451491  |
| H  | 0.0709572899  | 2.8552438364  | 4.8198774228  |
| C  | -0.8095100988 | 4.1905177118  | 2.6592142333  |
| C  | -1.7390655528 | 4.9129717217  | 1.6743704317  |
| H  | -1.5181321869 | 4.6063576507  | 0.6479473992  |
| H  | -2.7672419016 | 4.6144943760  | 1.9090683952  |
| C  | 2.0533681839  | -0.2084479129 | 0.6131436484  |
| C  | 2.4103663842  | -0.8294766518 | -0.5903511714 |
| C  | 3.2614636332  | -1.9232282500 | -0.5231052715 |
| H  | 3.5525360221  | -2.4255341484 | -1.4305343098 |
| C  | 3.7355056076  | -2.3669466616 | 0.7101662614  |
| C  | 3.4071547906  | -1.7698332025 | 1.9069458239  |
| H  | 3.7930047198  | -2.1395927194 | 2.8419427763  |
| C  | 2.5467240001  | -0.6770416341 | 1.8506015707  |
| C  | 1.8627029455  | -0.8238824744 | -2.9915945226 |
| C  | 1.0089613747  | 0.0090776394  | -3.9546208062 |
| H  | 0.0849139828  | -0.5553523645 | -4.1281202409 |
| H  | 0.7337140607  | 0.9638892210  | -3.5005360315 |
| O  | -1.7084989442 | 6.3101830511  | 1.8300572370  |
| C  | 1.7298388767  | 8.4990696212  | 0.9507052564  |
| C  | 0.5672474698  | 9.0999821802  | 1.4401253732  |
| C  | -0.5489134201 | 8.3461880080  | 1.7207729533  |
| C  | -0.5430543666 | 6.9635676144  | 1.5190499756  |
| C  | 0.6057194992  | 6.3658587814  | 1.0205402651  |
| C  | 1.7324239753  | 7.1272869807  | 0.7427367632  |
| H  | 0.5655508546  | 10.1669436762 | 1.5915215811  |
| H  | -1.4470558651 | 8.8024447994  | 2.1037723590  |
| H  | 0.6398252805  | 5.3037649667  | 0.8292551753  |
| H  | 2.6001609536  | 6.6188387606  | 0.3515895904  |
| O  | 2.7678168136  | 9.3504612597  | 0.6878480066  |
| C  | 4.0728898213  | 8.8414731253  | 0.4977032106  |
| H  | 4.0967988893  | 8.0522781481  | -0.2626630143 |
| H  | 4.6505295904  | 9.6972082007  | 0.1391612618  |
| C  | 4.6798403902  | 8.3522838937  | 1.8268543822  |
| H  | 4.4886400943  | 9.1150622621  | 2.5872895557  |
| H  | 4.1900639175  | 7.4172686800  | 2.1376165138  |

|   |              |              |               |
|---|--------------|--------------|---------------|
| O | 6.0755840716 | 8.1989530521 | 1.7964942712  |
| C | 6.5621502348 | 7.0323199484 | 1.1599895126  |
| H | 5.9565732051 | 6.1581645723 | 1.4386696884  |
| H | 7.5707626491 | 6.9042610102 | 1.5708028524  |
| C | 6.6638860906 | 7.1451036220 | -0.3346400399 |
| C | 6.4077203392 | 6.1563114923 | -1.1748000060 |
| C | 6.5958752188 | 6.2282968478 | -2.6588311862 |
| H | 7.5047405146 | 5.6679824999 | -2.9316639154 |
| H | 6.7197974718 | 7.2702331742 | -2.9887809309 |
| H | 6.0442344284 | 5.2021523047 | -0.8174139201 |
| H | 7.0148975227 | 8.1027620125 | -0.6922480802 |
| O | 1.6030817120 | 0.1552141836 | -5.2248872907 |
| C | 4.8081904117 | 2.7536280084 | -5.8125284732 |
| C | 4.2521932140 | 2.6466005613 | -4.5457127221 |
| C | 3.1929964365 | 1.7821932708 | -4.3093999401 |
| C | 2.6660060679 | 1.0162500181 | -5.3392510740 |
| C | 3.2326353806 | 1.1183728879 | -6.6130566050 |
| C | 4.2866795434 | 1.9727667436 | -6.8458424405 |
| H | 4.6054131477 | 3.2433366332 | -3.7204882859 |
| H | 2.7693274230 | 1.7467961379 | -3.3189191467 |
| H | 2.8193784922 | 0.5175952946 | -7.4070830663 |
| H | 4.7226849234 | 2.0572113193 | -7.8278500429 |
| O | 5.8525011547 | 3.5728355057 | -6.1511514409 |
| C | 6.4579041224 | 4.3645634010 | -5.1509221224 |
| H | 7.3804570470 | 4.7169188192 | -5.6177380392 |
| H | 6.7080360094 | 3.7493293558 | -4.2766525216 |
| C | 5.5748152352 | 5.5522617986 | -4.6918542833 |
| H | 4.5559084127 | 5.3923526545 | -5.0550661144 |
| H | 5.9506270206 | 6.4955055238 | -5.1096976543 |
| O | 5.4647657734 | 5.6509756075 | -3.2916752514 |
| N | 1.2337555410 | 0.8601284521 | 0.8205278302  |
| C | 1.1664899737 | 1.1114069743 | 2.1594512172  |

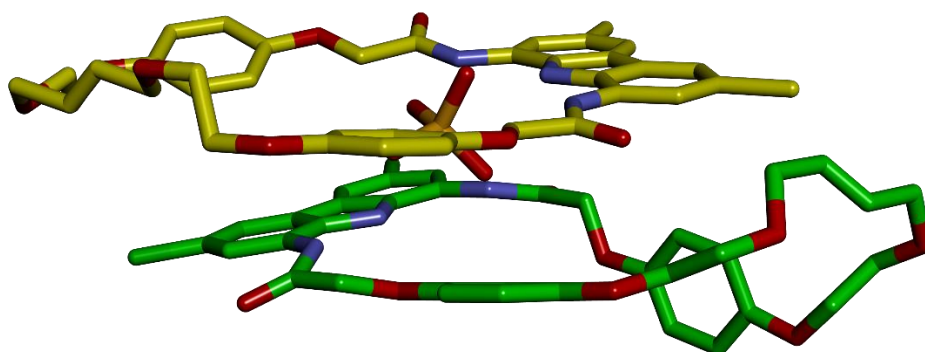

**Figure S81.** Example of an sandwich-like arrangement of  $3 \times \text{SO}_4^{2-} \times 3$  complex. The sixth lowest energy conformer.

**Table S32.** Cartesian coordinates of atoms in the sixth lowest energy arrangement of  $3 \times \text{SO}_4^{2-} \times 3$  complex (sandwich-like arrangement,  $\Delta E = 5.6$  kcal/mol in relation to the lowest energy arrangement).

|     |               |               |               |
|-----|---------------|---------------|---------------|
| 169 |               |               |               |
|     | -309.14751493 |               |               |
| Cl  | 5.0807921707  | -2.6368831172 | 4.9692400007  |
| Cl  | 7.5068707385  | -1.2806728732 | -2.9748135029 |
| O   | 3.0476313357  | -1.1183546678 | -5.1462294081 |
| O   | 0.2008888938  | -2.9575288142 | 4.2418778903  |
| N   | 0.7716879512  | -1.9018874989 | 2.2951663892  |
| H   | 0.3794302999  | -1.3760273064 | 1.4930964011  |
| H   | 1.5520058927  | -1.0674672941 | -0.2792724466 |
| N   | 2.4019816193  | -0.8167330731 | -2.9734420532 |
| H   | 1.6359180977  | -0.4761655016 | -2.3861569224 |
| C   | 4.2677717335  | -2.3114354190 | 3.4803836645  |
| C   | 5.0083215473  | -2.1530092858 | 2.3296166410  |
| H   | 6.0820650423  | -2.2346644153 | 2.3385009418  |
| C   | 4.3038354823  | -1.8652357798 | 1.1640400413  |
| C   | 2.1628653185  | -1.9535987809 | 2.3479330573  |
| C   | 2.8785731031  | -2.2189213378 | 3.5073582372  |
| H   | 2.3503779788  | -2.3604456059 | 4.4347948043  |
| C   | -0.0917669217 | -2.4266477186 | 3.1818787368  |
| C   | -1.5500537566 | -2.3479862445 | 2.7153487832  |
| H   | -2.1568512509 | -1.9859370682 | 3.5567877008  |
| H   | -1.6364318548 | -1.6579272415 | 1.8700034607  |
| C   | 3.5378807129  | -1.3453480064 | -0.9157235640 |
| C   | 3.5930138968  | -1.0534525505 | -2.2843546162 |
| C   | 4.8417080999  | -1.0382041421 | -2.8893490523 |
| H   | 4.9178038380  | -0.8347983622 | -3.9437057995 |
| C   | 5.9902541752  | -1.3067831574 | -2.1477900761 |
| C   | 5.9658388625  | -1.5913780313 | -0.8001784159 |
| H   | 6.8696194921  | -1.7890935848 | -0.2487700030 |
| C   | 4.7187331167  | -1.6095455007 | -0.1841067192 |
| C   | 2.1944178593  | -0.9096667332 | -4.2984359422 |
| C   | 0.7270842849  | -0.7384723109 | -4.6984050266 |
| H   | 0.4965067494  | 0.3368812877  | -4.7322582117 |
| H   | 0.6087685582  | -1.1592455710 | -5.7073650351 |
| O   | -1.9521541713 | -3.6518330375 | 2.3504326274  |

|    |                |               |               |
|----|----------------|---------------|---------------|
| C  | -5.9460464412  | -4.4067081705 | 1.3999607413  |
| C  | -4.9896830318  | -5.4255309302 | 1.4649306199  |
| C  | -3.6804377182  | -5.1464108486 | 1.7828495814  |
| C  | -3.2800113203  | -3.8337772203 | 2.0454268803  |
| C  | -4.2261665446  | -2.8221012334 | 1.9829123262  |
| C  | -5.5475291440  | -3.1049636283 | 1.6668891390  |
| H  | -5.3026127285  | -6.4358354253 | 1.2575189790  |
| H  | -2.9403369483  | -5.9286554615 | 1.8338501376  |
| H  | -3.9495663661  | -1.7975038599 | 2.1698323889  |
| H  | -6.2458566578  | -2.2839148724 | 1.6298511841  |
| O  | -7.2041125732  | -4.8035182200 | 1.0557006854  |
| C  | -8.2388929169  | -3.8488050310 | 0.9180078408  |
| H  | -7.8955028140  | -2.9617599364 | 0.3752085035  |
| H  | -9.0044170691  | -4.3534305239 | 0.3218984626  |
| C  | -8.8662048421  | -3.4617025373 | 2.2723311287  |
| H  | -9.0175389435  | -4.3802317141 | 2.8483634993  |
| H  | -8.1946319397  | -2.7993085657 | 2.8351726736  |
| O  | -10.1397226241 | -2.8797462847 | 2.1353723846  |
| C  | -10.1535020314 | -1.4809135313 | 1.9047017251  |
| H  | -9.5912555906  | -0.9613902832 | 2.6951134259  |
| H  | -11.2122689078 | -1.2129577675 | 1.9851611804  |
| C  | -9.6324041525  | -1.0701702847 | 0.5583005312  |
| C  | -8.7934215609  | -0.0652790434 | 0.3696773020  |
| C  | -8.2470561360  | 0.3644865775  | -0.9571368501 |
| H  | -7.1625318107  | 0.5057887411  | -0.8621890092 |
| H  | -8.6738497662  | 1.3465891977  | -1.2290697919 |
| H  | -8.4412282658  | 0.5266788647  | 1.2048439719  |
| H  | -9.9794607453  | -1.6495301015 | -0.2836563465 |
| O  | -0.0951367205  | -1.3967307851 | -3.7640164332 |
| C  | -4.2476785695  | -1.1002015776 | -3.9721678818 |
| C  | -3.4774185300  | -0.6198391257 | -5.0276665642 |
| C  | -2.0981917222  | -0.6960978361 | -4.9979068872 |
| C  | -1.4546240111  | -1.2665599351 | -3.9043113105 |
| C  | -2.2244812247  | -1.7774316300 | -2.8624188656 |
| C  | -3.6023045247  | -1.6987322939 | -2.8928668361 |
| H  | -3.9763754268  | -0.1623665985 | -5.8660864784 |
| H  | -1.5365228920  | -0.2859682736 | -5.8216836785 |
| H  | -1.7206257294  | -2.2148087011 | -2.0131549748 |
| H  | -4.1588506141  | -2.0966122346 | -2.0599458661 |
| O  | -5.5990164708  | -0.9561104513 | -4.0812125870 |
| C  | -6.3648989981  | -1.1303929957 | -2.9039261694 |
| H  | -5.8621032623  | -0.6414763084 | -2.0619311892 |
| H  | -6.4880723213  | -2.1983847197 | -2.6737569457 |
| C  | -7.7451594890  | -0.4892265510 | -3.1165929614 |
| H  | -8.2800434352  | -1.0260574368 | -3.9036458287 |
| H  | -7.6037429921  | 0.5551932512  | -3.4250673530 |
| O  | -8.5528922936  | -0.5804903571 | -1.9687798803 |
| N  | 2.4472572270   | -1.4939925408 | -0.0992474273 |
| C  | 2.8943685178   | -1.7564419928 | 1.1701194837  |
| S  | 0.4007241024   | 0.7646718991  | 0.1339387750  |
| O  | -0.3957938630  | -0.4727350383 | 0.3436107775  |
| O  | 1.5419435217   | 0.8151197398  | 1.0695213708  |
| O  | 0.8739060346   | 0.7875025822  | -1.2598050594 |
| O  | -0.4250752575  | 1.9726491561  | 0.4060954499  |
| Cl | 0.0908737476   | -0.3327841435 | 8.4209904405  |
| Cl | -6.8437941244  | 0.1815473002  | 3.7067064099  |
| O  | -4.7296452541  | 1.0336681301  | -0.8305974963 |
| O  | 3.4489528836   | 1.2916883306  | 5.1840549934  |
| N  | 1.7211049586   | 0.8888447500  | 3.7326395316  |

|   |               |               |               |
|---|---------------|---------------|---------------|
| H | 1.5201163007  | 0.8479728981  | 2.7184725873  |
| H | -0.6010831189 | 1.0820433520  | 2.0223329857  |
| N | -2.9182215377 | 1.1763183704  | 0.5636806633  |
| H | -1.9012722242 | 1.3724891870  | 0.5302567107  |
| C | -0.2343565477 | 0.0395339798  | 6.7670913195  |
| C | -1.5374567039 | 0.0580484998  | 6.3262513587  |
| H | -2.3590627065 | -0.1504956364 | 6.9906491360  |
| C | -1.7388825863 | 0.3519231902  | 4.9811309983  |
| C | 0.6654496913  | 0.6073263065  | 4.5946394907  |
| C | 0.8505010539  | 0.3073282418  | 5.9373884032  |
| H | 1.8491143288  | 0.2846429186  | 6.3392168785  |
| C | 3.0016132773  | 1.1771676200  | 4.0576587657  |
| C | 3.8452475238  | 1.3597996247  | 2.7982818735  |
| H | 3.8502329787  | 0.3976442271  | 2.2708795100  |
| H | 3.3438459333  | 2.0877247302  | 2.1458243920  |
| C | -2.4932345470 | 0.7598841244  | 2.8761134450  |
| C | -3.4116887259 | 0.8847999398  | 1.8225512268  |
| C | -4.7571040420 | 0.7086727832  | 2.1174481620  |
| H | -5.4870207021 | 0.7891472472  | 1.3298045814  |
| C | -5.1583810544 | 0.4073458405  | 3.4179500832  |
| C | -4.2781426904 | 0.2688084794  | 4.4679903580  |
| H | -4.6192118724 | 0.0241467534  | 5.4601464428  |
| C | -2.9251489800 | 0.4457117126  | 4.1839974420  |
| C | -3.5435267342 | 1.2314036878  | -0.6255239213 |
| C | -2.5194571970 | 1.5722628683  | -1.7042215482 |
| H | -1.8820501855 | 2.3769685786  | -1.3155779183 |
| H | -1.8801144557 | 0.6846477943  | -1.8263608681 |
| O | 5.1437844334  | 1.7742528063  | 3.1290615356  |
| C | 8.0056249112  | 2.3098546061  | 0.1433383329  |
| C | 8.2728769255  | 2.5741122208  | 1.4904929067  |
| C | 7.3072716526  | 2.3806085508  | 2.4502543512  |
| C | 6.0360379852  | 1.9187128301  | 2.0971697828  |
| C | 5.7691094601  | 1.6498315019  | 0.7619152242  |
| C | 6.7478944933  | 1.8410445516  | -0.2050088645 |
| H | 9.2535813722  | 2.9322350102  | 1.7574271573  |
| H | 7.5050290790  | 2.5802048439  | 3.4907977825  |
| H | 4.8001850639  | 1.2918132370  | 0.4492133394  |
| H | 6.4979224139  | 1.6104457726  | -1.2283281088 |
| O | 9.0430784187  | 2.5424817494  | -0.7134481815 |
| C | 8.9102417705  | 2.2663161004  | -2.0905416085 |
| H | 9.9338792246  | 2.2396458771  | -2.4728237770 |
| H | 8.4473941631  | 1.2895440765  | -2.2637613319 |
| C | 8.1561156936  | 3.3590071508  | -2.8599342293 |
| H | 7.0697367714  | 3.2747353701  | -2.7134481550 |
| H | 8.4735995345  | 4.3460398764  | -2.4866899859 |
| O | 8.4909667063  | 3.2203674980  | -4.2217762648 |
| C | 7.7866300653  | 4.0979494178  | -5.0802501559 |
| H | 8.2906976057  | 3.9912894936  | -6.0461423302 |
| H | 7.8844707814  | 5.1366186060  | -4.7340147683 |
| C | 6.3377375252  | 3.7319367074  | -5.2363695152 |
| C | 5.3338525526  | 4.5922326991  | -5.2091214411 |
| C | 3.8932213234  | 4.2124161267  | -5.3667160339 |
| H | 3.3834884801  | 4.3001535305  | -4.3891584321 |
| H | 3.8106239032  | 3.1659816439  | -5.6943890202 |
| H | 5.5053081468  | 5.6513736252  | -5.0819038543 |
| H | 6.1552007893  | 2.6735187308  | -5.3682934273 |
| O | -3.1260418569 | 1.9493354261  | -2.9129796401 |
| C | -0.7164067227 | 3.2955109188  | -6.0417942435 |
| C | -0.1239280903 | 2.8367540075  | -4.8744726161 |

|   |               |              |               |
|---|---------------|--------------|---------------|
| C | -0.8952749627 | 2.3774260906 | -3.8148197941 |
| C | -2.2809211399 | 2.3681018183 | -3.9058275594 |
| C | -2.8789178389 | 2.8283912013 | -5.0826799324 |
| C | -2.1111974305 | 3.2818206728 | -6.1311047422 |
| H | 0.9485232520  | 2.8220283885 | -4.7520061982 |
| H | -0.3867305437 | 2.0213572876 | -2.9318224922 |
| H | -3.9544574347 | 2.8140853227 | -5.1474329405 |
| H | -2.5695188784 | 3.6344127775 | -7.0404138226 |
| O | -0.0513655118 | 3.7543387580 | -7.1471078609 |
| C | 1.3589743590  | 3.8114319339 | -7.1388309303 |
| H | 1.6481070430  | 3.9016330050 | -8.1886922255 |
| H | 1.7864661556  | 2.8841472179 | -6.7386327682 |
| C | 1.8861351126  | 5.0336085379 | -6.3585322626 |
| H | 1.4501958834  | 5.0375816639 | -5.3477825720 |
| H | 1.5747466040  | 5.9447145497 | -6.8755286891 |
| O | 3.2893878901  | 5.0955496274 | -6.2943155534 |
| N | -1.1319223916 | 0.8756514522 | 2.8582012297  |
| C | -0.6523618592 | 0.6186058002 | 4.1127752935  |



#### 6.4. DFT Analysis of Sulfate Binding by Precursor **1** and Macrocycle **3**.

To rationalize weaker anion binding by macrocycle **3** compared to precursor **1** we performed additional calculations (DFT level of theory, wb97x-d/6-31G\*\* optimization and frequency calculations) of the precursor **1** and macrocycle **3** and estimated change in Gibbs free energy of the following hypothetical complexation reactions:

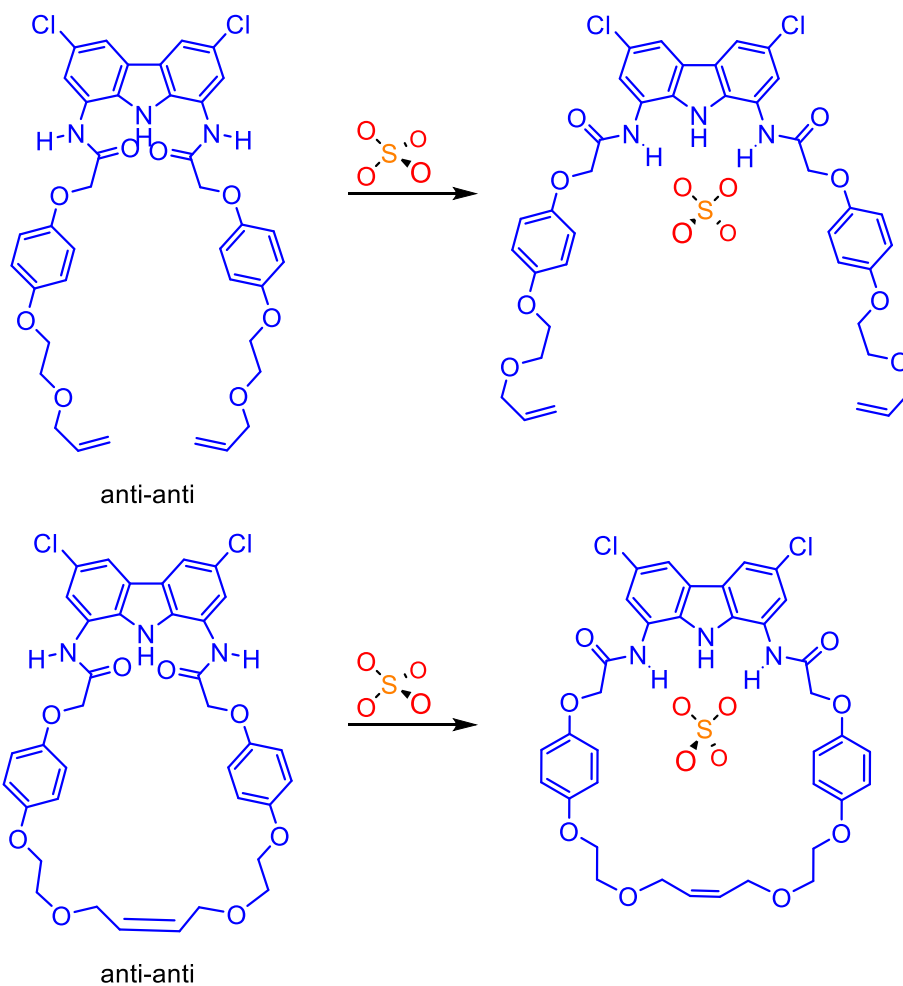

For both receptors the *anti-anti* conformation has the lowest energy. Anion binding switches the conformation of diamidocarbazoles to *syn-syn*, where three NH hydrogen bond donors point in the same direction. DFT results suggest that sulfate binding to the acyclic precursor is favoured by > 3 kcal/mol ( $\Delta G = -21.8$  kcal/mol for **1** versus  $-18.6$  for **3**) over sulfate binding to the macrocycle. This difference likely stems from the fact that in order to bind sulfate both **1** and **3** have to change its conformation from *anti-anti* to *syn-syn* and due to structural differences between them this process requires more energy for **3** in comparison to **1**. The difference in Gibbs free energies between the *anti-anti* and *syn-syn* conformations is estimated at 20.2 kcal/mol for **1** and 23.2 kcal/mol for **3** (by single point estimation).

## 7. References

- 1 L. M. Hancock, L. C. Gilday, S. Carvalho, P. J. Costa, V. Félix, C. J. Serpell, N. L. Kilah and P. D. Beer, *Chem. Eur. J.*, 2010, **16**, 13082–13094.
- 2 M. D. Lankshear, N. H. Evans, S. R. Bayly and P. D. Beer, *Chem. Eur. J.*, 2007, **13**, 3861–3870.
- 3 K. M. Bąk and M. J. Chmielewski, *Chem. Commun.*, 2014, **50**, 1305–1308.
- 4 K. Vanommeslaeghe, E. Hatcher, C. Caharya, S. Kundu, S. Zhong, J. Shim, E. Darian, O. Guvench, P. Lopes, I. Vorobyov and A. D. MacKerell Jr., *J. Comput. Chem.*, 2010, **31**, 671–690.
- 5 L. Martinez, R. Andrade, E. G. Birgin, J. M. Martinez, *J. Comput. Chem.*, 2009, **30**, 2157–2164.
- 6 J. C. Phillips, D. J. Hardy, J. D. C. Maia, J. E. Stone, J. V. Ribeiro, R. C. Bernardi, R. Buch, G. Fiorin, J. Henin, W. Jiang, R. McGreevy, M. C. R. Melo, B. K. Radak, R. D. Skeel, A. Singharoy, Y. Wang, B. Roux, A. Aksimentiev, Z. Luthey-Schulten, L. V. Kale, K. Schulten, C. Chipot, and E. Tajkhorshid, *J. Chem. Phys.*, 2020, **153**, 044130.
- 7 S. Grimme, C. Bannwarth and P. Shushkov, *J. Chem. Theory Comput.*, 2009, **13**, 1989–2009.
- 8 C. Bannwarth, E. Caldeweyher, S. Ehlert, A. Hansen, P. Pracht, J. Seibert, S. Spicher and S. Grimme, *Wiley Interdiscip. Rev. Comput. Mol. Sci.*, 2021, **11**, e1493.
